# Supplementary material for: Metabolomic profiling and biological properties of six Limonium species: novel perspectives for nutraceutical purposes
Source: Royal Society of Chemistry journal article supplement (doi:10.1039/d0fo02968h), 2021-01-01
Supplement: d0fo02968h1.xlsx [file d0fo02968h1.xlsx]

## Sheet: supplementary table 1
Compound	class	subclass	limonium-1-r001	limonium-1-r002	limonium-1-r003	limonium-2-r001	limonium-2-r002	limonium-2-r003	limonium-3-r001	limonium-3-r002	limonium-3-r003	limonium-4-r001	limonium-4-r002	limonium-4-r003	limonium-5-r001	limonium-5-r002	limonium-5-r003	limonium-6-r001	limonium-6-r002	limonium-6-r003	limonium-7-r001	limonium-7-r002	limonium-7-r003	limonium-8-r001	limonium-8-r002	limonium-8-r003	limonium-9-r001	limonium-9-r002	limonium-9-r003	limonium-10-r001	limonium-10-r002	limonium-10-r003	limonium-11-r001	limonium-11-r002	limonium-11-r003	limonium-12-r001	limonium-12-r002	limonium-12-r003	CompositeSpectrum	Retention Time
Pelargonidin	Flavonoids	Anthocyanins	18000000	17500000	17000000	1	1	1	31500000	31500000	32200000	381492	351386	337056	7352353	7538133	7884463	1	1	1	23900000	25000000	25600000	1	1	1	1	1	1	15000000	15100000	15500000	86200000	1	83400000	2930024	2940270	2962935	(271.06155, 686069.6)(272.0647, 108872.27)(273.0674, 15461.068)(274.06973, 2483.1333)	11.717
Cyanidin	Flavonoids	Anthocyanins	2917384	2828066	2726854	1041302	963039	924561	7291592	1060390	7278064	932208	898699	885652	830960	879491	895010	3439112	384633	3234047	1	2921331	3087655	734352	684800	652564	1088970	1191534	1263007	3121465	3146032	3146651	17600000	17200000	17200000	250083	260211	219044	(287.0562, 132998.58)(288.05945, 21944.713)(289.0661, 4480.8677)(289.0737, 36915.57)(290.0769, 4551.88)(291.0788, 116.74)(271.0613, 10092.82)(272.06454, 2970.1)(293.0427, 393.31665)	8.76303
Peonidin	Flavonoids	Anthocyanins	872142	818864	804804	1	1	1	1	1	1	1	1	1	1	1	1	1	1	1	297546	320383	334734	1	1	1	486171	567322	572871	1	1	1	636368	642443	625158	126342	136049	142591	(301.07477, 25306.9)(302.07803, 2684.1335)(284.0613, 10785.275)(285.73306, 118789.39)(286.74237, 13046.949)(305.9976, 878325.2)(306.59024, 210682.3)(307.093, 79230.62)(287.07492, 14200.477)(288.0758, 1420.79)(325.4388, 6855.225)(309.0614, 199.50667)	3.3509
Pelargonidin 3-O-arabinoside	Flavonoids	Anthocyanins	1	111013	122248	543061	450285	428945	1	1	1	70776	1	1	1	1	1	1	1	1	889375	959892	965094	698269	639518	623255	1	1	1	255919	254983	273255	439425	427455	1	1	1	1	(403.10364, 13941.2295)(404.1069, 1838.6333)(385.5362, 27584.236)(386.5426, 4022.851)(408.61267, 2493.91)(388.7832, 3845.1536)(426.1035, 24128.764)(427.10876, 3659.2937)(410.08954, 468.956)	6.64782
Pelargonidin 3-O-glucoside	Flavonoids	Anthocyanins	764437	663185	647494	220811	200225	184211	1726837	1749726	1765304	183534	186885	169080	190596	196915	183330	1	360479	332452	2292870	2517795	2538423	1	1	99983	225908	257684	260682	735463	762965	777558	1644139	1601917	1573767	826879	896015	942262	(433.1139, 41928.496)(434.1176, 8422.627)(435.12106, 2331.7556)(415.1061, 3297.63)(456.108, 6573.16)(457.1148, 370.3)(438.09448, 24809.361)(439.0976, 3740.886)	8.05468
Delphinidin 3-O-arabinoside	Flavonoids	Anthocyanins	1838887	1747546	1732377	1	1	1	3628499	3773286	3690176	1	1	1	1837432	1918178	2014249	1629271	1571578	1509611	2317191	2493252	2554079	1	1	1	1	1	1	2829271	2875935	2852969	321057	303512	300116	173826	192874	215128	(435.0933, 80845.664)(436.0964, 16617.266)(437.0991, 2871.7056)(438.10043, 35345.418)(439.10364, 5915.2134)(422.43134, 10558.668)(423.1127, 6208.2085)(463.0889, 6268.569)(440.07925, 8187.237)	6.15742
Pelargonidin 3-O-galactoside	Flavonoids	Anthocyanins	1	1	1	1	1	1	1	1	1	1	1	1	1	1	1	1	1	1	1	1	1	1	1	1	1	1	1	1	1	1	1	1	1	826879	896015	942262	(438.10043, 30236.225)(439.10364, 4820.3535)	4.03
Cyanidin 3-O-xyloside	Flavonoids	Anthocyanins	1	1	1	1	1	1	1	1	1	1	1	1	1	1	478538	1	1	1	1	1	1	1	1	1	1	1	1	1	1	1	1	1	1	1	1	1	(443.0991, 696.11)(424.0691, 204.6)	1.522
Petunidin 3-O-rhamnoside	Flavonoids	Anthocyanins	410182	1	368647	141371	125421	129106	1284278	1319722	1318494	178926	173063	172054	400762	410478	433991	1	1	1	1346537	1472052	1520739	558517	492685	443068	1	1	1	1	1	1	148346	144000	136581	1	146589	148936	(447.35855, 10809.689)(448.12442, 3196.5186)(449.1341, 190.46)(431.11514, 4578.7446)(430.11096, 2238.2766)(431.10864, 1173.62)(449.33774, 8160.404)(449.13907, 3434.8167)(432.88843, 3979.8787)(474.21597, 1035.9708)(455.72037, 2454.05)	8.631
Cyanidin 3-O-galactoside	Flavonoids	Anthocyanins	1	1	1	1	1	1	1	1	1	1	1	1	1	1	1	1	1	1	1	1	1	1	1	1	1	1	1	1	1	1	54400000	53300000	52200000	2110614	2236607	2307716	(449.10855, 1014203.75)(450.11185, 227853.62)(451.114, 43494.223)(452.1165, 10911.35)(431.09763, 44850.355)(432.10098, 17859.822)(433.1038, 2430.6433)(459.09286, 64550.746)(460.09592, 13540.132)	6.162
Cyanidin 3-O-glucoside	Flavonoids	Anthocyanins	1171408	1078528	1061548	2059032	1833261	1769620	766444	11200000	785641	2426300	2355239	2249558	1212999	1267249	1343418	2292939	2145724	2035885	3794377	4100094	4238664	1936721	1705733	1723894	2483187	2816576	2940454	9293067	9470008	10100000	54400000	53300000	52200000	2110614	2236607	2307716	(449.10873, 271713.12)(450.11194, 59890.047)(451.114, 10968.801)(452.1173, 8373.9375)(432.99982, 29181.037)(433.35077, 14080.705)(433.1038, 2430.6433)(472.09525, 2825.3027)(459.09286, 64550.746)(460.09592, 13540.132)	7.647
Malvidin 3-O-arabinoside	Flavonoids	Anthocyanins	124511	120465	118226	470684	96001	415707	225194	234857	242047	1058735	1009201	1026266	196337	206599	217910	1010545	961155	910598	599679	628084	644336	293797	261835	250704	772159	837497	890880	649015	645601	660392	8138665	8105873	7868349	1835873	1915254	2045600	(463.12943, 46222.89)(464.1313, 11862.235)(465.12955, 1251.2915)(445.20886, 11718.642)(446.2239, 3995.1099)(447.30762, 2382.808)(467.1502, 238.97)(447.13107, 5052.3535)(448.1363, 228.21)(486.83017, 3760.2168)(488.48038, 1236.0818)(468.1135, 4560.197)	15.1922
Delphinidin 3-O-galactoside	Flavonoids	Anthocyanins	1	1	1	1	1	1	1	1	1	1	1	1	1	1	1	1	1	1	1	1	1	1	1	1	1	1	1	1	1	1	33300000	33500000	32900000	714446	788254	799573	(465.10342, 511291.75)(466.1067, 113782.85)(467.1091, 44194.496)(468.1116, 5357.016)(447.09268, 37442.984)(448.09598, 7595.85)	5.362
Delphinidin 3-O-glucoside	Flavonoids	Anthocyanins	25000000	23600000	23200000	6639674	6178042	5910553	23400000	20900000	23400000	17100000	17000000	16300000	7635519	7990188	8317272	33400000	32500000	32000000	28700000	19400000	19900000	6505703	5909722	5691921	14100000	15300000	16300000	24600000	24800000	11800000	33300000	33500000	32900000	714446	788254	799573	(465.10385, 547597.3)(466.10715, 121362.195)(467.1091, 27161.447)(468.1119, 3692.3906)(448.98547, 243796.06)(448.86713, 74878.28)(449.0993, 23970.113)(450.102, 2118.585)(449.1134, 1302.63)(488.0888, 5664.756)	7.09178
Cyanidin 3-O-(6''-acetyl-galactoside)	Flavonoids	Anthocyanins	1	1	1	130749	116418	105503	1091180	1150231	1138277	1	1	1	1	1	1	1	1	1	1	1	1	1	1	1	1	1	1	413731	395708	400493	190529	196568	182706	1	1	1	(473.10876, 20501.74)(474.11276, 7582.723)(475.116, 971.2933)(477.12106, 4167.112)(480.1268, 332.28)(497.11258, 2893.5535)	6.796
Petunidin 3-O-glucoside	Flavonoids	Anthocyanins	117793	106075	210313	291270	309936	307850	1955860	2024668	2010808	373424	371805	345677	185786	193599	228934	583854	551589	530941	750173	798597	829461	432124	383244	385977	446783	516289	533095	768162	772852	772118	1200904	1184999	1150487	1803049	1936106	2054920	(479.11887, 32729.762)(480.1223, 6642.2944)(481.12122, 2630.5715)(461.64142, 98881.13)(462.4756, 29676.648)(463.91376, 11590.646)(505.9742, 1165.6843)	8.38661
Petunidin 3-O-galactoside	Flavonoids	Anthocyanins	1	1	210313	1	1	1	1	1	1	1	1	1	1	1	1	1	1	1	1	1	1	1	1	1	1	1	1	1	1	1	1	1	1	1803049	1936106	2054920	(479.1191, 87663.85)(480.12204, 19375.447)(481.11743, 4564.5366)(462.10675, 257652.25)(466.1085, 229089.14)(467.1104, 46540.6)	6.315
Peonidin 3-O-(6''-acetyl-galactoside)	Flavonoids	Anthocyanins	245276	232154	230860	376402	349180	351775	1	1	1	1	1	1	1	1	1	1256200	1243842	1141120	1	1	1	905061	807327	812490	1	1	1	1	1	1	3621459	3573772	3466479	189038	200841	221400	(487.12494, 43833.797)(488.12842, 9907.774)(489.12958, 3166.365)(510.11044, 956.9533)	7.635
Cyanidin 3-O-(6''-acetyl-glucoside)	Flavonoids	Anthocyanins	1	1	1	130749	116418	105503	1091180	1150231	1138277	1	1	1	143743	1	1	1	1	1	1	1	1	1	1	1	1	1	1	413731	395708	400493	190529	196568	182706	1	1	1	(491.119, 9131.31)(492.1228, 371.53)(473.10876, 20501.74)(474.11276, 7582.723)(475.116, 971.2933)(477.12106, 4167.112)(480.1268, 332.28)(497.11258, 2893.5535)	6.8859
Malvidin 3-O-glucoside	Flavonoids	Anthocyanins	1	1	1	1599820	1464223	1407981	1404898	1444547	1448461	1036625	1008870	968959	495986	510329	1	1	1	1	533281	620833	637771	1	181976	1	634954	738988	791684	1	1	1	1	1	1	1	202145	235393	(498.21234, 79612.29)(497.97275, 41428.438)(499.136, 16459.838)(476.13824, 796.58203)(497.64224, 5090.8804)(495.641, 2118.605)(496.1356, 1056.85)(516.1312, 6524.0796)(517.11774, 1615.6234)(518.12915, 399.555)(500.7913, 896.2883)(503.13513, 466.20667)	3.5357
Pelargonidin 3-O-(6''-malonyl-glucoside)	Flavonoids	Anthocyanins	110607	99069	107381	1	170954	166545	459133	479353	475457	235752	233607	226182	333941	368078	418825	471285	461880	246159	1	134495	147604	1	871062	861053	1275351	1416977	110756	562923	113699	129510	192374	150652	182615	299251	304644	257860	(503.38464, 5506.428)(503.87292, 2464.2422)(505.10526, 1563.6804)(506.1064, 306.56)(521.1289, 13770.72)(522.1194, 12460.805)(523.1173, 8435.284)(524.1186, 2078.9873)(504.31146, 1578.1311)(543.1012, 2472.005)(544.1012, 1107.7625)(545.0991, 723.425)	20.4005
Delphinidin 3-O-(6''-acetyl-galactoside)	Flavonoids	Anthocyanins	1	1	1	1	1	1	1	1	1	1	1	1	1	1	1	1	1	1	1	1	1	1	1	1	1	1	1	1	1	1	1	1	1	92186	105531	104780	(507.10068, 5735.9336)(508.10184, 1366.4701)	22.01
Delphinidin 3-O-(6''-acetyl-glucoside)	Flavonoids	Anthocyanins	175089	161489	162483	1	1	1	1	1	1	1	1	1	221800	180932	261271	1	1	1	917597	984764	1031479	1	1	1	1	1	1	1	1	1	1169705	1195119	1126467	92186	105531	104780	(507.11145, 14185.028)(508.11258, 3086.5)(509.1194, 515.1867)(491.12186, 3492.0)(492.1245, 539.86)(510.1255, 2365.3967)(511.131, 277.09668)(491.1252, 1039.9)(517.117, 1687.3667)	14.8481
Peonidin 3-O-(6''-acetyl-glucoside)	Flavonoids	Anthocyanins	245276	232154	230860	376402	349180	351775	1	1	1	1	1	1	1	1	1	1256200	1243842	1141120	134172	145622	143683	905061	807327	812490	146307	185827	189374	1	1	1	3621459	3573772	3466479	189038	200841	221400	(507.1511, 9280.0)(508.15402, 1054.18)(487.12494, 43833.797)(488.12842, 9907.774)(489.12958, 3166.365)(512.16187, 1279.4701)(494.1357, 5638.1733)(530.1139, 526.345)(510.11227, 701.83)	7.28455
Petunidin 3-O-(6''-acetyl-galactoside)	Flavonoids	Anthocyanins	163384	138377	133272	3822883	1857717	1727480	3199860	3268445	3145979	3362810	3352082	3227936	566471	1	564504	5169177	5059646	4902509	934617	1730400	986085	3194764	3120690	2943963	1703255	1	1996214	1964512	1967260	1991048	1379748	2816294	2823781	8837076	9956763	10500000	(521.6235, 10318.813)(524.29193, 3598.222)(526.14716, 1351.4899)(503.10828, 45434.734)(504.10892, 20920.709)(505.10724, 376.01)(522.1476, 17699.145)(523.14923, 7096.455)(524.1487, 640.23)(544.1205, 1081.6678)(545.1189, 524.0)	24.741
Malvidin 3-O-(6''-acetyl-glucoside)	Flavonoids	Anthocyanins	3343676	3063095	2968478	309670	292520	273404	346824	366177	365347	783224	769734	748388	278022	172827	293203	647020	609873	616475	194279	330921	226283	318289	297822	289863	19300000	461010	485258	391391	406111	417117	505633	515465	498453	935200	1005660	1047320	(537.1516, 14190.014)(538.1523, 4897.1836)(539.29926, 2499.0237)(540.1516, 421.28998)(519.1394, 6350.0938)(520.14014, 2474.7869)(521.1379, 1446.5404)(536.1673, 164310.92)(537.1679, 81774.6)(519.6428, 14169.71)(520.645, 3866.64)(521.1373, 2174.24)(522.1466, 4358.26)(523.1501, 695.07)(559.13257, 12965.733)(560.13306, 5512.4077)(561.1308, 3519.6084)(562.13104, 820.82794)(542.73096, 8942.81)(543.9331…	19.4617
Pelargonidin 3-O-(6''-succinyl-glucoside)	Flavonoids	Anthocyanins	1	1	1	258807	181238	182564	1	1	96619	1	1	1	266183	304058	320455	1	1	1	1	1	125632	234275	197841	178626	537063	609664	635279	169650	158338	164072	1	113533	115602	190354	233676	239060	(537.24347, 2648.503)(538.00037, 610.68567)(539.1552, 654.31)(516.2738, 1153.9557)(517.1181, 4246.947)(538.6603, 236548.84)(540.164, 117011.81)(517.39966, 29762.062)(518.62897, 23881.805)(519.9347, 18901.996)(522.1463, 26738.047)(557.3869, 5571.776)(558.1232, 1984.4701)(559.12164, 958.17)(540.9925, 11897.656)(542.12695, 25096.414)(543.12085, 17216.229)(544.1204, 5008.3364)	12.7169
Cyanidin 3-O-(6''-malonyl-glucoside)	Flavonoids	Anthocyanins	1	1	1	112259	310979	308806	1	1	1	113814	103990	102489	1	1	1	88223	97203	97281	1	1	1	274115	239461	218176	1	1	1	1	1	1	267177	290248	274726	127349	160571	167207	(538.1227, 2130.06)(519.11176, 7877.3516)(520.1155, 3276.23)(539.92834, 21344.746)(542.13446, 15627.149)(520.61523, 24794.092)(523.1202, 21060.664)(523.1174, 29234.875)(524.11804, 9150.921)(558.606, 5066.528)(543.101, 11046.477)(544.10126, 4221.5166)(545.0991, 2511.0767)	15.908
Cyanidin 3-O-(6''-succinyl-glucoside)	Flavonoids	Anthocyanins	1	1	1	1	1	1	1	1	1	1	1	1	1	1	1	1	1	1	104549	1	120473	1	1	1	1	1	1	1	1	1	2557501	2530049	2416762	1	1	1	(549.1137, 3023.5867)(534.3341, 3676.8562)(534.1327, 339.18)(553.1385, 16396.088)(554.1414, 2263.0334)(533.1296, 6873.31)	2.61336
Malvidin 3-O-galactoside	Flavonoids	Anthocyanins	1	1	1	1	1	1	1	1	1	1	1	1	1	1	1	1	1	1	1	1	1	1	1	1	1	1	1	136489	139344	153599	1	1	1	1	100705	101663	(559.1218, 652.71)(513.11786, 5292.813)(512.11914, 1075.625)(532.10486, 1515.905)(536.07544, 710.3566)	2.139
Malvidin 3-O-(6''-acetyl-galactoside)	Flavonoids	Anthocyanins	1	1	1	309670	292520	273404	346824	366177	365347	783224	769734	748388	1	172827	1	647020	609873	616475	1	330921	1	318289	297822	289863	1	461010	485258	391391	406111	417117	505633	515465	498453	935200	1005660	1047320	(559.13257, 12965.733)(560.13306, 5512.4077)(561.1308, 3519.6084)(562.13104, 820.82794)(519.1392, 5824.23)(520.14, 1974.84)(521.1374, 427.33)(537.15, 8307.12)(538.1507, 3147.6406)(539.1489, 1877.7439)(540.1516, 421.28998)	20.424
Vitisin A	Flavonoids	Anthocyanins	516010	480199	462632	135682	112364	104586	278896	267973	277828	1065615	1011953	997409	1949255	2067674	2156628	138824	127668	112137	703505	748827	809904	82098	81171	87360	159795	140257	194099	1054700	1074580	1126729	1	103653	96570	441512	494144	496773	(564.1345, 719.375)(543.10864, 8734.408)(544.1087, 2229.437)(545.111, 865.312)(565.15625, 3432.2112)(584.9433, 43338.367)(586.02747, 13334.567)(587.1268, 4512.0713)(588.10834, 2276.9434)	13.6606
Pelargonidin 3-O-sambubioside	Flavonoids	Anthocyanins	155378	847300	831151	375675	333237	326712	381855	388178	382394	86619	2587535	81394	2320712	2487310	1	1129851	2054540	1055930	865234	940405	972530	1154149	1032340	970253	3359175	3694092	3923940	1	1	1	326868	333026	322455	1231563	3529778	3715201	(565.156, 9373.65)(566.1606, 5057.737)(547.7913, 66931.01)(548.72894, 13310.068)(550.0862, 7555.3003)(551.16534, 2467.5432)(548.56274, 86502.28)(549.5657, 16955.082)(550.4153, 7548.8047)(551.1645, 1024.12)(588.1424, 1719.7148)(570.9434, 4699.238)(571.1374, 587.50995)	6.03625
Pelargonidin 3-O-rutinoside	Flavonoids	Anthocyanins	668464	614853	603619	115318	106864	325590	1713097	1736153	1762158	119476	113329	108158	330821	336483	362736	149233	153782	144225	433991	470982	497248	145951	134488	123705	148307	167114	173484	239835	239963	237060	4428297	4361265	4291442	127529	293971	306711	(581.1874, 11387.686)(582.19086, 2811.396)(563.4239, 6889.511)(564.6748, 2470.1973)(581.0079, 47837.547)(581.9427, 17526.44)(582.9445, 3286.3953)(563.17706, 31525.834)(564.1811, 12229.445)(565.18256, 4141.517)(602.8318, 981.18445)(584.152, 5472.1104)(585.15173, 1205.4275)	10.1507
Cyanidin 3-O-rutinoside	Flavonoids	Anthocyanins	740831	694402	668292	401693	633967	634844	3074612	3139308	1	376777	362686	349411	181353	178833	184253	840307	789362	812381	1	472286	497455	188801	167911	163264	217899	249950	272916	1900925	1960194	1861379	2459970	2493873	2369520	466109	719038	852259	(595.5251, 32505.254)(596.52734, 14404.394)(598.1685, 22405.812)(599.1681, 7825.3438)(600.1666, 2533.018)(600.1474, 10441.752)(601.1473, 2787.3823)(602.14545, 462.472)	18.9463
Cyanidin 3-O-(6''-p-coumaroyl-glucoside)	Flavonoids	Anthocyanins	2020291	1942494	1866179	613742	368687	345080	3128997	452631	429013	1317874	1541054	1565872	1026216	1044131	1044120	15400000	15100000	1	1511581	1684863	1744939	3092848	3049365	2954026	1872287	2078592	2213349	957487	988719	961683	1	192293	307757	101259	122532	126022	(596.9745, 15810.47)(598.1577, 6826.1504)(599.73285, 3570.6245)(601.14777, 4515.73)(577.1269, 7487.4)(578.1273, 3887.7305)(579.1256, 218.6)(596.97107, 68996.85)(597.1701, 46910.25)(578.1457, 8213.31)(618.1274, 6045.011)(619.1298, 1943.4425)(601.12024, 68123.24)(602.1233, 18895.447)(603.1252, 3742.48)	15.1784
Delphinidin 3-O-sambubioside	Flavonoids	Anthocyanins	711049	658065	646751	1549898	1399121	1325130	334881	359858	340653	1338038	3470885	1231345	1	1	1	1091518	1089766	1088562	465349	524219	552627	205634	186416	177325	1182898	1315106	1011217	223221	484270	509581	2749973	557362	562870	5606058	1904178	1980054	(597.5863, 10010.905)(599.14923, 10503.175)(600.1475, 7756.3027)(601.1472, 3021.1575)(602.1454, 240.51001)(582.46405, 550.4683)(580.1249, 257.59)(598.1551, 32039.43)(599.15546, 14132.499)(600.16614, 4826.89)(601.1636, 1174.485)(582.1524, 1019.06)(621.1242, 13046.87)(622.1276, 3559.5)(603.02515, 18577.582)(603.1256, 5421.4766)	18.8314
Pigment A	Flavonoids	Anthocyanins	579034	538804	535500	73300000	528589	489351	31400000	30700000	31200000	1109722	1104468	1101793	234020	224319	246803	912065	864562	881198	287904	277746	313225	456209	437006	402234	393359	422424	460158	320362	320370	313905	354303	359017	358512	810407	887966	930202	(611.2342, 23222.314)(612.2351, 8990.505)(613.3621, 4498.6104)(614.31165, 4147.28)(615.17645, 1312.3264)(593.1582, 3944.041)(594.1589, 1555.3589)(595.15704, 989.13104)(610.687, 650193.3)(611.6866, 424468.75)(613.1858, 176394.3)(614.184, 71349.69)(615.1798, 21780.2)(616.17017, 5548.415)(593.1588, 2433.995)(594.1596, 856.375)(595.91626, 8465.797)(596.92004, 9825.392)(597.9188, 4958.395)(598.1689, 9…	21.0215
Cyanidin 3-O-(6''-caffeoyl-glucoside)	Flavonoids	Anthocyanins	11200000	10400000	10000000	14400000	12900000	12100000	493383	510434	505617	20300000	19100000	19000000	5971372	6091731	6185487	3339920	3168204	3128443	9216127	9941498	10500000	29000000	25600000	23800000	5615266	3087450	3185707	1131225	1126231	633898	3266571	3101011	3026127	1794563	2118573	2216886	(611.4769, 104146.65)(612.47955, 32378.0)(613.52325, 8092.459)(614.1489, 1256.3542)(594.13416, 3395.004)(612.1651, 69260.03)(613.1665, 42889.24)(614.1704, 698.77)(595.14124, 4329.7715)(596.1434, 1444.8966)(597.1362, 1687.7367)(598.1463, 3947.0935)(599.14935, 568.12994)(600.147, 208.92)(634.13684, 1403.268)(617.11707, 124848.71)(618.3687, 36451.63)(619.12115, 10879.026)(620.1239, 1977.3116)(621.14…	5.70883
Delphinidin 3-O-rutinoside	Flavonoids	Anthocyanins	11200000	10400000	10000000	1	51100000	49000000	1566351	1635810	1626716	39000000	37400000	36400000	817073	857816	10800000	107000000	105000000	103000000	9216127	9941498	10500000	16000000	442023	15400000	374357	414885	14600000	498467	490033	486619	36200000	35400000	34900000	48900000	957085	1021171	(612.05853, 78341.78)(613.0591, 23278.45)(614.6679, 9852.201)(614.17145, 1143.0751)(594.0536, 4029.98)(594.60724, 2651.858)(595.1578, 339.61)(612.18494, 536567.06)(613.1847, 208859.0)(595.7389, 5616.0283)(597.1692, 3739.6775)(598.16736, 1983.4926)(599.16724, 413.46503)(634.148, 7039.323)(617.8511, 3574.76)(618.26605, 1104.9962)(619.1384, 831.83496)	17.6214
Peonidin 3-O-rutinoside	Flavonoids	Anthocyanins	655015	589650	589571	3666820	3354463	3229041	888391	920842	917012	3061194	2953966	2888682	2008580	2043237	2065350	5793193	5659053	5549605	961394	1003326	1053737	1586589	1499799	1427289	1991405	2184273	2324899	1060018	1060668	1080657	1755520	1676337	1657875	3313706	3702109	3861852	(614.1638, 59267.043)(615.1633, 22155.68)(616.16205, 2759.8333)	23.361
Cyanidin 3-O-sambubioside	Flavonoids	Anthocyanins	2191123	2095756	2014691	416585	349464	321339	484034	454489	510957	382111	189442	373567	195910	213634	228882	1962232	606858	1770524	1701453	1838655	1921638	151378	133149	137692	227060	251122	267897	883101	919136	887600	142381	135052	130531	422845	490557	508519	(617.1201, 12702.964)(618.1224, 4843.517)(619.11914, 2340.487)(617.1141, 10158.05)(618.1178, 1517.75)(601.1203, 60767.754)(602.1233, 16708.168)(603.12085, 4120.4043)(643.7957, 7357.763)(644.1331, 2706.52)(623.1017, 4332.297)(624.1064, 1470.8467)	15.5448
Petunidin 3,5-O-diglucoside	Flavonoids	Anthocyanins	214806	207011	196839	1	1	1	3143365	3277207	3271302	1	1	1	210822	222581	249992	1	1	1	1479749	1570655	1675380	1	1	1	1	1	1	1996584	2013138	2027633	1086950	1046503	1037743	1	1	1	(625.1772, 9846.81)(626.181, 2858.6433)(641.1626, 25318.38)(642.1657, 7045.654)(643.17755, 1377.87)(642.1839, 1528.5133)	5.94125
Delphinidin 3,5-O-diglucoside	Flavonoids	Anthocyanins	17400000	16600000	16100000	11300000	10100000	489071	1691093	1741327	1772311	1200172	14100000	14000000	1142277	1188546	1266116	3460510	2111886	3859089	14700000	16000000	16800000	21700000	19200000	17900000	4205250	4755147	4983259	1375100	1411951	1385879	1918244	1859793	1818525	1494648	1736828	1816806	(627.15784, 81859.49)(628.1608, 22680.922)(629.16235, 5547.2817)(630.16547, 243.34999)(615.17773, 5524.2266)(611.58984, 120567.555)(612.14404, 41822.973)(613.1463, 9093.398)(614.1489, 1293.5829)(616.1684, 1509.3201)(650.76953, 7811.134)(652.14685, 6657.646)(653.14496, 5098.4077)(654.14514, 1743.0941)(655.5552, 1723.652)(656.173, 7654.603)(633.13074, 24329.629)(633.42865, 8646.93)(634.6849, 1719.2…	7.96325
Pinotin A	Flavonoids	Anthocyanins	1779466	1659896	1608839	609562	511646	511673	4682963	4743155	4778085	2132042	2029583	1982050	3137842	3316967	3466633	224131	222043	217832	1674207	1787605	1918523	152581	130221	125095	1513047	1650612	1767781	3799260	3924688	3862775	9952817	9898690	9549292	1116759	1311029	1348274	(628.1792, 11907.151)(629.17883, 5507.7964)(630.1774, 1550.7933)(611.3269, 59883.684)(612.144, 21992.215)(613.14624, 6807.6216)(626.18024, 27341.193)(627.1805, 13567.595)(611.66376, 226015.83)(612.66547, 117201.18)(613.6655, 82570.984)(614.17053, 315.38998)(648.12775, 864.64667)(630.9916, 162511.33)(632.137, 55598.11)(633.13776, 14024.061)(634.14105, 2354.7393)	10.5743
Pelargonidin 3,5-O-diglucoside	Flavonoids	Anthocyanins	2530917	2357782	2274254	1	1	1	895758	13800000	13800000	5296771	5188006	4911953	17100000	17700000	18300000	9047455	8599797	8096114	13900000	14900000	15800000	138054	128330	119919	287856	342212	357241	917825	930246	923503	194736	14100000	13600000	599610	671715	695429	(632.9895, 72559.08)(633.64386, 23385.998)(633.8942, 11689.247)(635.34924, 2888.898)(637.14856, 306.29)(617.11615, 1364.2968)(631.1298, 9547.573)(632.13336, 1955.8434)(615.13556, 40332.438)(616.1387, 11549.8545)(617.1204, 10403.678)(618.1204, 1238.92)(655.88, 3884.36)(655.62787, 948.72833)(636.6419, 27228.393)(636.1176, 5815.6494)	8.19769
Malvidin 3-O-(6''-p-coumaroyl-glucoside)	Flavonoids	Anthocyanins	244045	238072	228791	147674	133209	123610	202800	204045	201848	301786	283623	272387	261602	272381	288685	1	1	1	1	1	1	1027644	919587	893965	1	1	1	94869	1	84916	830865	801551	795945	1	91664	100870	(640.17194, 37062.02)(641.17505, 11060.196)(642.1773, 1498.1549)(621.7783, 7035.2603)(622.7805, 2557.388)(624.1871, 459.31)(622.1783, 3545.0698)(664.4374, 7391.717)(664.4087, 1658.4812)(644.89886, 7448.6084)(646.1507, 1836.0597)	7.72836
Delphinidin 3-O-feruloyl-glucoside	Flavonoids	Anthocyanins	215105	207011	196839	1	1	1	298074	284678	276811	1	1	1	400243	412367	439335	1	1	1	858478	988959	982905	1	1	1	1	1	1	1996584	82806	2027633	1821494	1813863	1750074	1	1	1	(642.07367, 72944.44)(643.0768, 22506.55)(645.15436, 9999.81)(664.12, 569.68)(647.12604, 43308.707)(648.1289, 12430.726)(649.13135, 2316.504)	9.17336
Malvidin 3-O-(6''-caffeoyl-glucoside)	Flavonoids	Anthocyanins	1014620	931882	926449	454864	398059	390837	889655	892847	1	855014	803810	1	408403	418401	443235	760695	722025	707186	187460	204991	209942	1149766	1	1012399	1	1	1	256026	260053	258733	2243021	2181362	164934	336550	393636	401859	(656.1727, 17502.105)(657.1732, 10415.281)(658.1714, 8002.6494)(659.1712, 2887.9114)(660.1696, 708.6267)(637.1554, 8848.45)(638.1588, 2132.41)(661.14154, 40393.85)(662.14465, 11979.746)(663.14703, 2891.5051)(664.149, 279.42)	11.1432
Malvidin 3,5-O-diglucoside	Flavonoids	Anthocyanins	1	1	1	426746	404548	380310	1	1	80747	79142	352656	342607	1	1	1	764140	723576	708259	1	1	1	803417	721811	694808	1	1	1	197718	195309	204523	1	1	1	336550	1	401859	(656.1731, 16262.604)(657.17377, 9635.963)(639.1716, 35665.37)(640.1746, 11329.16)(641.17694, 1613.0133)(660.8678, 4709.151)(662.1809, 1675.1599)(663.192, 290.695)	22.636
Cyanidin 3-O-(6''-malonyl-3''-glucosyl-glucoside)	Flavonoids	Anthocyanins	1	1	1	1	1	1	1	1	1	1	1	1	1	1	119140	1	1	1	122611	130099	143029	117479	108084	105917	1	1	1	1	1	1	1	1	1	1	1	1	(702.1685, 6527.02)(699.6156, 8072.089)(700.1933, 1983.0333)	5.727
Cyanidin 3-O-xylosyl-rutinoside	Flavonoids	Anthocyanins	1	1	1	250439	223933	205059	1	1	1	161844	151427	152032	816288	867516	877003	415264	420921	401152	1	1	1	184767	162731	151092	161363	225113	239456	1	1	1	1	1	1	130625	162694	168346	(729.1954, 6506.36)(730.53546, 1033.8867)(731.2129, 996.79)(709.2114, 5650.647)(710.2133, 1664.4567)(750.3923, 9837.654)(752.1868, 23002.443)(753.19684, 30830.299)(754.201, 12047.376)(755.20416, 2225.5935)(732.1867, 6697.347)(733.1867, 2466.2612)(734.18134, 738.506)	22.4094
Cyanidin 3-O-sambubioside 5-O-glucoside	Flavonoids	Anthocyanins	162964	139675	139645	6376730	5874061	5586864	351898	372056	360366	1828422	1848482	1787326	735567	1038334	738687	2085029	1992270	1957682	435865	471501	498101	703235	659736	626600	799219	784856	829815	460754	471622	451518	664352	647732	625859	172096	195036	207489	(743.95514, 13067.096)(745.2087, 12031.496)(746.207, 9528.417)(747.2063, 6726.033)(748.20465, 2566.24)(744.2095, 140000.98)(745.2102, 99879.055)(730.1928, 2508.8867)(731.1932, 1300.3767)(766.3068, 3950.4177)(767.613, 2154.3013)(769.189, 9791.122)(770.1916, 2449.3499)(748.2642, 19943.465)(749.2637, 8246.588)(750.1841, 1713.5422)	23.7119
Cyanidin 3-O-glucosyl-rutinoside	Flavonoids	Anthocyanins	2277391	2073849	2031546	56300000	50400000	48600000	715545	460587	11900000	368941	150253	360031	4114920	4102887	4195649	90000000	305956	318776	2084085	2157437	2255821	2884054	2689175	2597788	3145564	3397764	3652461	1956963	910886	917757	3498375	3385600	3362188	4600424	20200000	21100000	(762.2169, 5555.055)(763.2179, 3679.8552)(742.0179, 5296.541)(743.019, 3337.3728)(744.0055, 14662.318)(745.2085, 12474.343)(758.225, 498676.8)(759.22577, 363940.16)(780.7154, 7295.685)(781.7083, 2870.109)(762.5648, 66661.35)(763.56445, 30357.564)(766.19556, 744.2125)	25.1573
Pelargonidin 3-O-glucosyl-rutinoside	Flavonoids	Anthocyanins	642711	579973	565984	3554236	537547	516138	120819	130475	131675	772918	800895	759683	150532	98595	520404	6318115	6050446	5872623	120606	129306	137299	314046	268905	253507	331983	227883	250415	219884	159561	228993	184336	1443517	1448394	525939	590622	612197	(764.2129, 8396.745)(765.21075, 2591.847)(766.209, 838.66)(746.2021, 42052.906)(747.20197, 19087.758)	24.3642
Cinnamtannin A2	Flavonoids	Flavanols	1	1	1	360883	311433	820208	1	1	1	1	374204	365771	1	1	1	262928	243599	241826	1	1	1	189682	192515	188916	183959	181125	206328	1	1	1	1	1	1	368495	260718	424970	(1136.3464, 10554.407)(1137.3339, 4347.0713)(1138.2635, 1574.9102)(1139.2554, 1034.34)(1177.2906, 1974.1361)(1178.2876, 500.62332)	28.4811
(+)-Catechin	Flavonoids	Flavanols	2670894	2630654	2534134	326014	1170041	1115344	483226	521491	524152	829584	481771	1	2135793	2095207	2069971	567661	594695	566621	200014	4798613	5001660	1078156	976359	207662	875984	902557	996432	784891	807139	820995	13400000	13000000	13000000	416806	500792	556165	(290.25317, 12924.272)(291.0759, 2569.7715)(273.70303, 79965.27)(275.07562, 17193.357)(274.06937, 3333.0535)(292.87735, 3479.3508)(292.08972, 1408.7767)(273.079, 27883.523)(274.08304, 5909.0293)(314.64337, 7183.524)(315.32495, 2051.0535)(297.06088, 3152.0947)(298.0614, 1039.2675)	6.40537
(-)-Epigallocatechin	Flavonoids	Flavanols	437865	425139	406365	22800000	21200000	6591085	734604	2996547	3002846	12900000	12400000	11800000	1312033	1344593	1380455	11400000	10700000	10500000	1400462	1497310	1540555	7233237	6460585	6015652	5402947	5900306	6140196	923783	1296913	903358	4883902	4717090	4582178	7294316	7893200	8217436	(306.53967, 2997.7842)(288.05966, 6864.296)(289.06583, 3756.6035)(307.38165, 184353.38)(308.0855, 41382.62)(309.0895, 5712.165)(289.07172, 59161.254)(290.0757, 8070.6997)(291.07776, 1970.2034)(329.06488, 16790.875)(330.0695, 8262.054)(331.0735, 566.3333)(315.06976, 12304.747)	5.5265
(+)-Catechin 3-O-gallate	Flavonoids	Flavanols	535662	468341	452123	381016	328372	323222	615443	647532	486964	1	481339	482244	639684	653911	686903	1	1	1	379614	415000	415031	1121322	983645	904810	122723	143047	155855	181655	188967	1	289155	268108	319339	1	1	1	(443.74323, 9893.14)(444.10065, 1253.904)(424.69452, 6400.6724)(425.0953, 649.2767)(426.1045, 200.76)(443.09778, 9974.81)(444.10095, 567.0)(425.0886, 673.62665)(469.0934, 2680.615)(448.57162, 9374.155)(449.5745, 959.68994)	4.19923
(+)-Catechin 3-O-glucose	Flavonoids	Flavanols	137756	121238	124927	140346	132116	118003	305559	311064	308667	101817	96993	93368	178372	184146	194375	257506	233101	221464	561788	579867	610340	132837	118786	123618	171741	1	102965	126529	129575	123851	1071297	1313670	558309	247280	285414	308377	(455.42197, 9419.506)(454.14526, 1601.5234)(457.13577, 8276.137)(458.1398, 1133.57)(435.16125, 8956.021)(435.12128, 4807.8115)(458.1561, 3231.5916)(437.43768, 5116.7217)(436.88922, 664.90625)(479.11942, 92696.09)(480.1231, 46908.508)(457.8791, 56738.84)(459.18896, 19364.26)(463.12125, 257.78668)	7.00603
(+)-Gallocatechin 3-O-gallate	Flavonoids	Flavanols	3037883	2869725	2905697	16200000	14700000	13900000	5839412	5965416	6071661	9318571	8973361	8650100	2632383	2767546	2832693	14100000	13400000	12600000	2742077	2965281	3038959	13400000	12400000	12400000	10400000	11600000	12100000	1798427	1775512	1865935	6807252	6683530	6465970	4892692	5254046	5593134	(458.71368, 177279.23)(460.09677, 63738.918)(461.0997, 12028.664)(462.10065, 255.405)(459.0939, 243465.38)(460.09695, 54608.883)(461.09796, 10468.544)(462.10156, 1251.7417)(481.07684, 6874.027)(482.0768, 161.37)(467.083, 2557.8394)(468.0863, 998.4625)	5.941
Procyanidin dimer B2	Flavonoids	Flavanols	1	1	1	1	1	1	93288	112473	111323	258831	254374	242958	1	1	1	222466	210550	207212	1	1	1	93796	89511	1	1	1	1	117911	113887	123151	188170	194783	175529	360376	377676	407027	(560.13293, 7421.9243)(561.13074, 4779.4185)(562.13104, 1181.16)(605.1427, 1057.55)	20.424
Theaflavin	Flavonoids	Flavanols	571113	535060	518997	1	1	1	884217	885753	876498	1	1	1	216825	229148	231267	1	1	1	848554	936022	961956	1	1	1	1	1	1	325109	323060	335830	373769	377105	359927	1	1	1	(567.124, 8622.751)(566.12256, 2931.1003)(567.1273, 582.29004)(569.12994, 21057.254)(570.13336, 6694.5317)(571.13727, 1446.3016)(553.13544, 1938.59)(591.1119, 1869.8325)	10.7386
Procyanidin dimer B7	Flavonoids	Flavanols	2604870	387189	380763	1	1	1	93288	112473	111323	258831	254374	242958	1427108	1514986	1573704	222466	210550	207212	1834909	2099811	2164466	93796	89511	1	241090	275390	292075	117911	113887	123151	188170	194783	175529	360376	377676	407027	(578.1422, 21020.375)(579.15125, 3427.35)(560.65515, 6498.9673)(561.13074, 4779.4185)(562.13104, 1181.16)(603.1314, 36911.07)(602.12317, 20608.59)(603.12524, 4879.95)(584.1263, 7751.0835)(585.12885, 558.9567)(586.1245, 4107.967)	15.3514
Prodelphinidin dimer B3	Flavonoids	Flavanols	5873413	5332495	5176730	14400000	12900000	12100000	15900000	16500000	16600000	19200000	18100000	18000000	3718195	3772024	3855295	3274428	3113827	3056531	4479301	4910720	5134696	28300000	24900000	23200000	8219072	9199248	9596045	10200000	10200000	10300000	4057828	3917361	3799057	1790213	2081405	2182868	(610.6343, 17794.068)(612.1439, 10069.985)(613.14667, 1916.3833)(593.13043, 3038.6667)(611.5729, 126166.09)(612.5754, 39579.688)(613.577, 8917.795)(614.1489, 1243.0011)(594.1336, 5785.78)(596.13824, 2570.5432)(597.1362, 1664.2767)(598.1463, 3894.2932)(599.14935, 561.6667)(633.12274, 102713.78)(634.1279, 50200.316)(635.1158, 35739.184)(636.118, 5525.5566)(617.1178, 178887.38)(618.4524, 52402.19)(6…	5.91525
(-)-Epicatechin-(2a-7)(4a-8)-epicatechin 3-O-galactoside	Flavonoids	Flavanols	905820	827467	813417	5049670	4600410	4318763	1073101	1108753	1042350	2529675	2531150	2350449	2511558	2504074	2579926	199115	193961	5727536	1084400	1157589	1233655	1482010	1379428	1281355	1859624	2095275	2232658	1332046	1386502	1423657	1670070	1556596	1564410	3969278	4581060	4716830	(688.18286, 46458.016)(689.18243, 19063.5)(732.171, 1822.4202)(733.1719, 1350.8988)	24.2898
Theaflavin 3-O-gallate	Flavonoids	Flavanols	168983	154882	157715	159204	134377	130737	1	1	1	469065	468325	445998	142344	154382	159646	257968	249298	236841	1	1	1	244925	216092	207545	141701	174966	188004	1	1	1	74430	75343	80107	1	1	1	(718.12354, 12305.524)(719.12665, 5726.928)	18.1211
Procyanidin trimer C1	Flavonoids	Flavanols	1	1	1	1	1	1	1	1	1	1474858	1460149	1385040	1	1	1	1	1	1	1	1	1	1	1	1	1	1	1	1	1	1	1	1	1	1	1	1	(852.23566, 4850.9336)(853.2302, 1573.6998)(894.2238, 614.14667)(895.2246, 429.21335)	27.123
Procyanidin trimer T2	Flavonoids	Flavanols	1	1	1	117569	98380	90594	82549	80741	89659	1474858	1460149	1385040	1	1	1	466182	467711	435104	1	1	1	1	1	1	1	1	1	1	1	1	1	1	1	1	1	1	(867.2371, 5104.1235)(868.24005, 1142.7067)(852.23566, 4850.9336)(853.2302, 1573.6998)(892.2202, 3585.2966)(893.2222, 1205.4049)(873.20294, 1996.1066)(874.2037, 1370.8002)(875.20197, 855.20337)	20.6998
Prodelphinidin trimer C-GC-C	Flavonoids	Flavanols	1	1	1	254627	220207	205824	1	1	1	200805	187947	179425	1	1	1	166130	171500	166634	1	1	1	1	1	1	1	92884	105266	1	1	1	1	1	1	216485	266792	288130	(882.2084, 7478.111)(883.2082, 2723.8962)(884.2063, 470.16)	26.044
Prodelphinidin trimer GC-GC-C	Flavonoids	Flavanols	1	1	1	1029134	918932	889757	1	1	1	290179	121665	118908	184437	187309	200506	700250	691599	682879	165756	172162	110707	389549	369736	189342	408474	485881	546199	1	1	1	259765	251063	241817	918775	1093057	1115845	(898.6431, 5371.7456)(899.81116, 1607.9099)(880.20886, 4696.287)(881.20935, 3617.3325)(899.2173, 2417.3591)(900.20703, 335.83398)(922.2061, 11287.909)(923.20966, 4763.1367)	22.6225
Pinocembrin	Flavonoids	Flavanones	194994	192683	195221	725855	647078	622879	161493	166015	176060	181189	182787	171355	197548	252117	250367	1	1	1	166691	180682	367306	562799	511124	477278	173709	232166	258282	251799	256863	265644	375543	367478	339202	313100	357729	363593	(257.15912, 3578.4824)(257.06738, 854.70996)(243.08, 235.15)(259.1787, 9215.817)(260.71384, 2890.6624)(243.20111, 1673.6759)(243.08502, 7184.3633)(281.07318, 2779.623)(284.07407, 546.62604)(261.53452, 9478.624)(264.55945, 955.9375)	3.40025
Naringenin	Flavonoids	Flavanones	2685131	2630654	2533874	267719	1	1	4753985	4833125	4958175	2621418	2539231	1	1122212	1142591	1194132	567661	1094469	1171222	1	3797168	3937517	1	1	1	774030	879419	913651	2271597	2287396	2324842	13400000	13000000	1637317	387466	389387	167135	(272.79968, 96779.34)(273.95612, 12453.781)(274.07022, 1566.346)(258.0665, 1162.4266)(257.0676, 266.24)(273.08173, 13260.256)(274.0895, 3473.157)(255.5703, 4191.15)(257.06836, 570.99)(296.3949, 994.73114)(298.06104, 206.07332)(281.0522, 189.29)	9.3926
Sakuranetin	Flavonoids	Flavanones	425995	386439	379517	316850	587786	554549	1	1	1	955350	630046	628043	430749	1559186	1620628	175200	427637	419211	1	1	1	437540	420165	418798	242035	148086	135173	1	1	1	1	1	1056595	1	1	1	(287.90915, 19329.008)(287.96878, 3334.6726)(270.95547, 3573.67)(290.1015, 72304.625)(291.772, 476766.62)(291.1072, 449713.47)(292.1094, 60004.51)(272.08832, 5002.849)(273.84537, 3822.2124)(313.0915, 9038.573)(291.5591, 3718.313)	8.89682
Eriodictyol	Flavonoids	Flavanones	440603	432622	411565	7414758	6842286	6473947	1785579	1842890	2996736	4609393	4411789	4264291	758261	750212	786805	6773409	6474479	6030796	20700000	21700000	22200000	5988436	5501642	5290746	5328158	5801660	6213745	917917	883417	905341	74500000	60400000	72000000	1157649	1202463	1245852	(288.28967, 27379.72)(290.4453, 11648.637)(291.07642, 3143.9268)(273.7355, 2464.098)(289.07178, 117173.11)(290.07544, 22078.463)(291.0792, 4090.3726)(271.85303, 463194.0)(272.2653, 93262.25)(273.067, 28472.729)(274.06927, 3382.29)(315.06863, 6822.1997)(294.0456, 4839.934)	7.72928
Hesperetin	Flavonoids	Flavanones	303163	270792	279427	1	1	1	709329	716547	736456	1	1	1	128278	139971	163046	1	1	1	360026	384601	394599	1	1	1	1	1	1	778085	776987	775925	308930	306081	303331	446418	136049	143188	(305.442, 31013.867)(307.08377, 47044.25)(287.57562, 4476.009)(306.69012, 12934.006)(307.6018, 11401.913)(307.0964, 3112.14)(288.15378, 81094.625)(289.6894, 11230.667)(326.57095, 2425.394)(309.06186, 24202.662)(310.06213, 10961.327)	3.81836
6-Prenylnaringenin	Flavonoids	Flavanones	1	1	1	791565	671849	628991	1	1	1	1	1	1	1	1	1	1	1	1	1	1	1	235886	212097	206114	1	363484	1	1	1	1	1	1	1	194456	255771	278547	(323.12354, 7956.7734)(324.127, 531.84503)(341.13638, 1307.4767)	14.014
8-Prenylnaringenin	Flavonoids	Flavanones	2521947	2894371	2880116	791565	671849	628991	1400221	200412	313201	545910	530393	530938	564125	626502	612334	313478	291666	309878	3305487	3419380	3471095	235886	212097	206114	329153	363484	393372	736010	746419	723667	383465	483162	454039	194456	255771	278547	(341.6116, 33189.438)(342.69495, 21255.938)(344.2713, 10343.84)(344.3975, 10620.349)(345.1442, 3432.83)(322.87094, 2778.1545)(324.1335, 803.15)(342.14075, 32507.137)(342.32272, 10641.929)(345.14624, 1448.03)(323.21268, 11550.917)(324.26633, 3597.8064)(325.56427, 822.68567)(363.78934, 4134.5083)(346.1221, 4999.41)(347.12106, 1710.8926)	8.41097
Isoxanthohumol	Flavonoids	Flavanones	838686	719729	748841	240274	224499	222191	409920	125971	115001	593918	584106	571193	311385	327882	331104	188986	179225	183646	1202264	1294392	1368729	651098	610966	602001	725262	803840	831340	600715	578513	605996	802726	774938	757970	1	1	1	(356.92517, 6970.632)(356.1477, 1419.38)(356.81067, 287.82)(338.9743, 4658.247)(338.81833, 759.44995)(340.4786, 1058.59)(341.1413, 1171.19)(357.3281, 994.05)(340.3509, 1884.486)(339.48105, 5888.6304)(377.93457, 8496.209)(378.39935, 2374.3113)(380.152, 1232.685)(382.1575, 322.2)(360.05402, 11674.527)(360.82037, 3118.798)(364.1415, 394.8)	7.17906
6-Geranylnaringenin	Flavonoids	Flavanones	4554644	4261828	3454446	454260	430330	410941	210587	571580	558740	522198	504647	483915	435079	567266	619277	376023	349485	329447	1242086	910000	943713	547064	519380	514184	452880	494833	501785	1	372550	2713170	802426	780058	735978	1	1	1	(409.23526, 15928.037)(410.50278, 4355.171)(411.70004, 8686.529)(412.2151, 10074.61)(413.2152, 6289.03)(391.27774, 10541.834)(392.4737, 3281.2986)(392.98764, 2415.916)(410.58078, 33966.6)(412.2105, 18303.803)(415.22714, 1149.7965)(392.85657, 1646.0117)(395.20428, 2994.145)(432.77927, 7882.9365)(434.95444, 16024.761)(435.60638, 5092.98)(436.20618, 1047.9133)(414.5128, 1356.6566)(417.1738, 1528.02)	11.4821
Naringenin 7-O-glucoside	Flavonoids	Flavanones	136405	1	123626	140004	129568	127479	200206	351221	239122	101817	96993	93368	177486	183748	194785	254001	232106	220406	561441	578869	609626	132837	119132	123618	1	99964	102965	126269	128924	123851	1219341	1542095	558628	241420	263047	284965	(434.2244, 13523.497)(435.12195, 4166.662)(418.12003, 1183.235)(436.718, 5499.496)(437.25302, 666.22107)(419.5957, 6331.058)(422.13803, 3342.2966)(457.7524, 31950.125)(459.28848, 13277.937)(463.12213, 794.80505)(443.098, 3474.79)(444.1011, 114.82)	7.35533
Naringin 4'-O-glucoside	Flavonoids	Flavanones	1	1	1	140004	129568	127479	200206	351221	239122	101817	96993	93368	177486	183748	194785	254001	232106	220406	561441	578869	609626	132837	119132	123618	1	99964	102965	126269	128924	123851	1219341	1542095	558628	241420	263047	284965	(434.23688, 14052.498)(435.12183, 4631.4697)(418.12003, 1183.235)(436.718, 5499.496)(437.25302, 666.22107)(419.5957, 6331.058)(422.13803, 3342.2966)(457.7151, 9896.377)(459.3204, 2838.9668)(463.12213, 794.80505)(443.098, 3474.79)(444.1011, 114.82)	7.3725
Naringin	Flavonoids	Flavanones	155239	838883	827268	487006	433562	407652	186389	181548	190806	152849	144371	138468	707511	739397	760315	343795	300784	306711	181176	195521	206806	162473	145804	128966	390247	428715	445519	279519	279517	271701	5600823	5528483	5431161	126035	151891	155277	(581.9557, 6496.4263)(582.2894, 1500.284)(563.1756, 3267.04)(581.5223, 56988.363)(582.1918, 17306.05)(583.19507, 5112.132)(563.17706, 35274.59)(564.1808, 14261.164)(565.1871, 2829.26)(604.2997, 6365.254)(607.1861, 3080.2734)(608.1945, 3114.2168)(586.5959, 13677.508)(587.1604, 4078.1208)(588.1672, 2438.66)(590.1877, 2534.2568)	7.289
Poncirin	Flavonoids	Flavanones	320554	335264	367578	384496	349094	335559	313816	425326	332954	251013	244432	244880	989979	1023826	1061651	1	158292	1	1306924	1430174	1502384	675706	627033	609954	160920	201296	207208	702725	701955	727358	12700000	12700000	12500000	835729	923805	967396	(594.5807, 17231.215)(595.7006, 4286.879)(578.1907, 2310.21)(579.93835, 3716.9548)(598.53314, 121519.945)(599.53644, 34557.68)(601.20386, 8705.248)(580.2061, 9249.61)(580.9977, 34431.582)(581.6895, 17698.549)(582.5252, 4984.299)(621.1142, 3184.1174)(621.5809, 8710.271)(622.18304, 3394.2832)(602.62396, 5743.118)(600.50287, 3721.5369)(601.1645, 322.45)	9.20144
Eriocitrin	Flavonoids	Flavanones	1	252349	238010	8383878	7743640	7455821	3512670	3570192	3564726	6354156	6036785	5943278	1151892	1168065	1172891	16300000	16100000	15900000	1	98064	103369	3632115	3587797	3467521	2195447	2408444	2564140	2245951	2301218	2197188	1	4778927	4773444	101259	121824	125277	(596.2992, 110978.016)(597.1705, 72876.7)(580.1579, 6208.973)(600.17725, 4749.7734)(582.1842, 3888.4578)(625.17847, 871.75)(601.16394, 2858.1143)(602.1556, 1005.9367)	20.1512
Neohesperidin	Flavonoids	Flavanones	4773843	173278	1	1243099	1139761	1091054	40300000	39500000	40100000	852070	843330	818513	133480	18400000	151020	283897	266445	175000000	14700000	340294	367306	2188131	2010392	1968526	22400000	162447	170675	361939	18300000	365308	62000000	598439	583003	134049	95900000	101000000	(610.58716, 690633.06)(611.58795, 400006.5)(614.1921, 6006.303)(615.1972, 1371.76)(593.00665, 47148.258)(594.19617, 20323.633)(595.20044, 3789.159)(593.6876, 6621.5073)(594.1953, 2146.525)(637.1885, 4127.0703)(638.1915, 334.57)(615.36505, 15157.224)(616.1659, 5355.4595)(617.15906, 988.9171)	19.351
Naringin 6'-malonate	Flavonoids	Flavanones	570345	527951	505586	2337048	2060610	1995683	698424	719131	699481	1363164	5480030	5402464	573569	567326	990090	12600000	2400660	2293436	1743010	1888243	1962348	535044	647749	626092	724995	800718	842677	439890	453608	1	575805	1087883	1098204	1159086	1295680	1344555	(667.1778, 5715.6626)(668.1785, 3356.5066)(669.1768, 2482.9534)(670.189, 86601.35)(671.18976, 55043.062)(672.188, 42401.72)(667.18976, 11440.013)(668.1938, 3335.577)(689.49664, 14977.101)(690.57477, 8398.221)(691.82996, 2535.2275)(693.1603, 544.97)(672.45197, 31187.463)(673.2728, 19102.83)(674.13, 14643.804)(675.16656, 6978.1934)(676.16486, 3136.3145)	21.854
Narirutin 4'-O-glucoside	Flavonoids	Flavanones	1	1	1	4754743	4400230	4144331	1111302	1114605	1110510	4144774	4039491	3967974	747293	764256	768836	7883032	7570126	7429775	1142975	1189309	1221732	868110	844251	797290	527078	577747	616372	818765	840214	799143	1	1943760	1945125	2299630	2642312	2751847	(747.2065, 21206.92)(748.2049, 9155.946)(749.20276, 1669.4529)(750.1982, 551.32)	26.778
7,4'-Dihydroxyflavone	Flavonoids	Flavones	636655	577552	553398	342955	280325	251391	724156	725008	715270	2722375	1	1	464698	280961	285981	1	1	1	327431	357560	384272	243116	214675	198982	1	1	1	536210	538498	548157	1010144	976960	949386	3768116	4183138	4324451	(257.18066, 2808.1553)(259.07556, 1981.71)(237.04494, 649.26)(239.0519, 166.47)(256.46283, 4487.251)(256.73563, 312.38)(240.95564, 2253.4878)(280.04993, 136.26666)(259.04266, 11425.239)	2.56771
Apigenin	Flavonoids	Flavones	15600000	15100000	14700000	1	1	1	27300000	27200000	27800000	1	1	1	6364963	6535187	6837487	1	1	1	20600000	1	1	112925	103119	84418	1	1	1	12900000	13000000	13400000	74500000	1	1	1159955	1203831	1246826	(270.87177, 558806.0)(272.0649, 108689.63)(273.0675, 13551.441)(274.07074, 384.16666)(271.06088, 359157.53)(272.06442, 99560.86)(273.0669, 48675.16)(274.0695, 3433.76)(293.04263, 3447.3918)	11.8404
Hispidulin	Flavonoids	Flavones	1	1	1	95028	84528	367015	284043	302478	269553	397724	428917	401864	402750	429227	115230	248865	230685	257287	145512	143137	1	298748	102673	103517	128244	642201	640361	1059148	1114129	1104483	100114	158922	169222	1	1	216818	(282.22766, 6790.1157)(283.0499, 3097.2742)(303.48056, 15458.086)(304.4819, 1763.3141)(285.35532, 892.76715)(325.05658, 2734.1475)(307.05283, 300.36002)	17.4853
Geraldone	Flavonoids	Flavones	947692	1039025	868530	1	1	1	82401	84038	90968	1	1	1	280820	301665	315777	198342	208496	178414	402785	448032	438053	1	1	1	1	1	1	342061	114098	117476	903114	901534	876676	137725	163573	172630	(286.07312, 12460.72)(285.06882, 383.80664)(266.0554, 2866.7986)(286.6784, 75341.68)(288.17514, 11617.024)(271.0734, 27273.252)(270.0682, 7548.754)(309.89096, 13118.355)(310.44193, 2861.4902)(312.07095, 953.83496)(290.38547, 3359.0256)(292.05365, 2327.8767)	3.42397
Nepetin	Flavonoids	Flavones	603706	509121	558477	1476220	1314912	1264374	1410462	1458739	1482677	1153323	1082781	1016917	653662	664793	1153217	2854628	2817809	2695203	4113698	4255933	4453331	1	526831	478927	969823	1126037	1170986	1598242	1629865	1586088	203502	192401	186712	1	1	1	(299.0476, 73305.41)(300.0486, 25301.506)(301.05243, 23706.465)(302.05658, 5909.246)(303.05984, 4379.916)(344.05396, 223.38)(300.7764, 5408.687)(317.0664, 14217.723)(318.07037, 3458.1921)(324.04868, 4073.3782)	3.94547
Cirsimaritin	Flavonoids	Flavones	1449800	1486145	1857855	7323988	7178466	7051976	22900000	23500000	23600000	7141272	6858154	6767531	22300000	23100000	22600000	34500000	33100000	31900000	7579821	8155631	8468591	1	11100000	10300000	842682	929115	966619	33800000	1	1734395	2271692	2224821	2198780	2066779	2278906	2316660	(315.15134, 34621.777)(316.99313, 9570.598)(317.54852, 3552.9846)(318.76102, 4883.853)(297.91785, 11290.667)(300.08078, 2537.2683)(318.59805, 11502.314)(320.10556, 1033.0463)(300.91068, 732.5581)(301.09, 9269.72)(339.36124, 2349.7656)(339.4144, 191.07332)(321.24146, 428.46094)(323.06674, 518.92334)(323.07626, 2181.57)	4.63083
Tetramethylscutellarein	Flavonoids	Flavones	1161731	1113429	1095603	1	17000000	1	104025	107546	101864	12700000	12200000	12300000	244224	243170	271268	25200000	23500000	21000000	8626463	441830	5988059	86557	12500000	12000000	24500000	26500000	27700000	201880	193919	201938	7560527	7401286	7341765	23800000	25100000	26900000	(343.11154, 738.06)(347.13016, 558.77997)(325.0363, 12171.4375)(325.1148, 4994.6104)(347.62927, 930.4917)(348.13046, 9622.097)(326.98416, 3258.573)(366.03943, 677164.7)(366.23947, 111338.445)(367.11102, 31535.959)(368.11325, 2990.0737)(348.56314, 16924.188)(349.73917, 3105.435)(351.10733, 10013.565)(352.1129, 959.59)	3.08394
Cirsilineol	Flavonoids	Flavones	264460	253478	254128	2086199	1924260	1853487	1	1	1	1504625	322538	312567	4394142	4756151	4883815	1911414	1	1843426	1	226513	203850	2411959	880857	2014722	1026126	1153363	1191841	1	122670	122113	1	10900000	1	172596	216728	246244	(344.61948, 19687.014)(345.34915, 5500.2725)(346.10608, 762.725)(328.81818, 18288.574)(328.8852, 6510.4297)(329.58295, 819.33746)(348.60687, 4270.842)(350.114, 6187.34)(329.4294, 5840.562)(332.102, 191.85)(369.08023, 4737.4434)(352.79688, 3263.464)	3.88953
Gardenin B	Flavonoids	Flavones	328984	307363	304116	3188624	2856806	1	1	1	1	6176192	1	1	303916	314528	318182	5746709	1	1	430322	2406584	834383	264736	240854	231003	1	12200000	12800000	692149	696078	694182	2374276	2333021	2242741	1	1	1	(360.36426, 1111.3463)(363.12473, 3977.9133)(343.4076, 7709.9795)(344.29865, 1447.65)(364.12088, 6240.4277)(343.85574, 3277.1184)(384.67694, 3465.4856)(384.9031, 1178.8109)(385.11557, 2469.7266)(364.5186, 4092.637)	2.94004
Sinensetin	Flavonoids	Flavones	1	1	1	2188201	2026701	1956457	2585613	2553845	2556637	2765608	2701108	2611548	1528768	1599654	1	1676369	1585389	1553284	2105239	1	2321650	1	1	1	1	1	1	3508065	3512521	3552540	2075265	2060503	1959601	712142	793075	830444	(374.17126, 7919.4375)(376.20197, 7295.801)(376.4757, 18438.36)(355.22443, 45105.195)(356.27588, 7592.149)(357.11377, 1995.26)(374.88034, 6537.4746)(376.47568, 23158.82)(377.1432, 8530.743)(378.1503, 1116.23)(359.9093, 4772.003)(360.13147, 2010.26)(399.13153, 3029.1614)(380.26855, 2248.3926)(381.34073, 2527.4355)(382.11865, 3988.202)	4.547
5,6-Dihydroxy-7,8,3',4'-tetramethoxyflavone	Flavonoids	Flavones	353476	335482	328736	1	1	2077278	1	1	1	638327	547345	651044	1	1	1	530316	201520	349058	1	1	1	1	1	1	1	1	1	1	1	1	127201	120365	108381	435099	552087	577180	(374.35257, 11464.593)(375.35165, 1817.9603)(357.09534, 7807.6733)(380.1213, 669.75)(357.1032, 4648.97)(399.09256, 42104.215)(400.0962, 6851.237)(381.0811, 1235.85)(383.0961, 345.71)	15.3654
Apigenin 6-C-glucoside	Flavonoids	Flavones	678418	667209	651015	191645	175509	167216	1477249	1505744	1514916	255051	248834	238649	166408	171068	158415	83299	1	1	2028369	2224244	2241886	1	1	1	217223	250875	253617	682523	706330	721142	2181584	2188414	2161640	1	1	1	(417.1001, 1788.75)(455.0955, 4078.6492)(415.10287, 5103.3135)(433.11395, 66108.31)(434.11743, 14136.813)(435.1214, 3749.4602)(438.08755, 8152.0864)(438.0935, 2215.7703)	8.0504
Apigenin 7-O-glucoside	Flavonoids	Flavones	811434	1	529825	2549991	2062728	2274266	638426	646130	620631	128085	119837	114160	397393	811701	837224	705338	691402	692425	335456	370999	393409	145021	126651	127950	1	1	1	156473	156513	150522	210550	215321	214259	1	1	1	(421.29034, 21567.598)(421.4816, 6781.4434)(404.64224, 9886.089)(405.3448, 2057.2942)(406.14954, 692.05005)(425.1498, 3550.43)(404.39417, 7305.7266)(404.14563, 3662.2)(405.13794, 1230.3066)(443.51175, 2533.8508)(426.02792, 1535.6555)	6.3403
Apigenin 7-O-glucuronide	Flavonoids	Flavones	4680275	4517416	4357893	342097	316902	192526	19200000	19400000	19200000	327138	299890	285904	6278956	6561991	6844229	324813	1	229662	15000000	15900000	16400000	191582	179819	173526	173554	187975	200381	9354852	9441866	9684301	1154087	1169544	1115441	193605	235689	99663	(447.0931, 294071.1)(448.0964, 65045.355)(449.09933, 24920.768)(450.1019, 2221.1067)(429.0877, 8761.647)(430.0898, 2158.01)(431.08762, 1048.5715)(447.0943, 392317.12)(448.0968, 95895.26)(449.10046, 20439.93)(450.1023, 2282.7234)(429.0893, 6197.93)(430.0901, 1089.81)(469.07455, 645.00336)(455.062, 1539.9584)	14.04
Chrysoeriol 7-O-glucoside	Flavonoids	Flavones	178213	159284	1	444424	1	404157	412983	433006	421311	951813	900682	933500	460528	490199	356571	1615528	1598543	1540704	132382	140537	595465	222979	202752	191136	740929	793003	837252	619008	608122	637848	7035245	7034989	6877867	298197	1688151	1801224	(462.9502, 63783.55)(463.9517, 14410.933)(465.1297, 1040.062)(445.51923, 10007.527)(446.11963, 2654.9387)(447.7818, 3653.836)(450.11093, 371.80667)(463.1311, 17526.514)(464.13174, 6447.388)(465.12958, 1477.6001)(446.07022, 10501.795)(446.17996, 3820.2566)(447.19086, 1856.5599)(485.11212, 6449.783)(486.11316, 1436.356)(487.11127, 378.636)(467.0992, 12251.306)(468.11142, 2052.6965)	15.6263
Luteolin 7-O-glucuronide	Flavonoids	Flavones	1	1	1	1	1	1	484660	485658	489729	1	1	1	107760	113176	121995	1	1	1	160175	171160	177768	1	1	1	1	1	1	262148	246426	254087	1	1	1	1	1	1	(463.08878, 16147.4375)(464.09186, 2560.7642)(463.08768, 12944.704)(464.09097, 1761.57)(449.75943, 142894.33)(448.09653, 93672.94)(449.09872, 17909.07)(450.10156, 508.29996)(487.08533, 1337.3633)(471.05673, 34752.855)(472.0598, 6971.1313)(473.0619, 858.6133)	7.6175
Chrysoeriol 7-O-(6''-malonyl-glucoside)	Flavonoids	Flavones	1	1	1	1	1	1	1	1	1	1	1	1	1	1	1	1	1	1	1	1	1	1	1	1	1	1	1	1	1	1	1	1	1	267964	289719	311920	(532.1055, 10451.33)	1.862
Apigenin 6,8-C-galactoside-C-arabinoside	Flavonoids	Flavones	571113	535060	518997	375675	333237	326712	884217	885753	876498	2285821	2185595	2179910	216825	229148	230994	961350	895869	898175	518717	569889	584792	989805	884675	830348	2834085	3106761	3310929	325109	323060	335830	373769	377105	359927	1061150	3003417	3157504	(564.1363, 1039.35)(547.14374, 19453.275)(548.14703, 4340.6836)(565.1556, 2551.5933)(548.1585, 62889.926)(549.08124, 12745.225)(550.1632, 7590.446)(551.16534, 2467.5432)(569.12994, 21057.254)(570.13336, 6694.5317)(571.13727, 1446.3016)	6.75117
Apigenin 6,8-C-arabinoside-C-glucoside	Flavonoids	Flavones	1	1	1	1	1	1	1	1	1	2285821	2185595	2179910	1	1	1	961350	895869	898175	1	1	1	989805	884675	830348	2834085	3106761	3310929	1	1	1	1	1	1	1061150	3003417	3157504	(564.1363, 1039.35)(548.1628, 104113.48)(549.1654, 19415.697)(550.1632, 7590.446)(551.16534, 2467.5432)	1.925
Rhoifolin	Flavonoids	Flavones	454265	428208	419879	208867	200587	182775	168640	181276	176489	164825	155273	156091	184065	206186	225947	406968	410505	388462	1	1	1	1	1	1	1	1	1	1	1	1	1	1	1	319828	1	1	(578.65173, 1624.0233)(579.6766, 1235.3899)(601.1642, 2652.416)(602.1556, 695.89667)(584.15515, 5649.2847)(585.6541, 1255.9983)(588.1721, 6537.97)	20.5695
Luteolin 7-O-(2-apiosyl-glucoside)	Flavonoids	Flavones	650123	599813	582101	194431	189702	176328	2188894	2230693	2265766	1366765	1301548	1281186	2501030	2647891	2766025	300917	296552	291150	893245	947886	1029137	105320	106589	104579	1	72333	74131	1351710	1374511	1443228	86382	1	1	294817	341956	350041	(582.15344, 12434.743)(583.1541, 6130.183)(584.1522, 4123.902)(585.1519, 1449.0933)(565.0106, 4943.4956)(565.15875, 2247.5999)(585.1257, 59876.793)(586.12836, 18916.713)(587.13104, 3677.4287)	15.9548
Chrysoeriol 7-O-apiosyl-glucoside	Flavonoids	Flavones	141405	121877	114077	5254862	1001916	938945	2119154	2173273	2185344	3903389	3750707	3689821	693856	705751	96766	10800000	10600000	10500000	1115054	474278	499088	2103286	2078760	2054342	1288825	1419083	1526731	1302860	1339500	1283218	3152450	3094029	609852	265567	317841	7210735	(595.0127, 17848.014)(596.7239, 14218.088)(598.168, 16360.561)(599.16766, 5625.6743)(600.1661, 1671.4482)(581.90515, 1004.16425)(595.45483, 20928.377)(597.1704, 35481.86)(598.16846, 24884.215)(599.1681, 8683.435)(600.16656, 3085.4102)(601.1645, 184.26)(581.1527, 1049.7949)(581.66113, 1623.42)(617.4252, 3559.4604)(618.59955, 1469.019)(619.1386, 651.69)(602.1556, 620.0433)	20.4582
Neodiosmin	Flavonoids	Flavones	317261	279598	278284	49300000	45700000	43700000	21200000	20600000	21000000	35000000	33700000	32800000	9601353	9709927	10000000	95400000	93500000	91700000	8087727	8291420	8531655	14700000	14700000	14400000	11900000	12800000	13500000	9723849	9669279	9763056	32600000	32000000	31700000	44300000	50400000	52700000	(611.17, 214897.69)(612.17236, 80719.47)(613.1741, 38519.457)(613.843, 16260.96)(614.182, 16990.04)(593.1575, 2147.435)(595.16315, 4082.8901)(596.1678, 13094.81)(610.1859, 935266.0)(611.1868, 542515.8)(612.185, 401387.06)(613.1847, 156455.03)(614.18286, 63181.918)(615.1795, 20802.906)(595.97455, 14715.03)(597.0982, 8732.565)(597.17053, 9074.74)(616.1377, 5562.756)(617.064, 2878.4043)	23.9872
Apigenin 7-O-diglucuronide	Flavonoids	Flavones	408696	172471	163190	1	1	1	1	1	1	1	1	1	456542	474989	501825	1	1	1	1	1	1	424151	388634	379442	1	1	1	1	1	1	1	1	1	1	1	1	(622.1276, 1927.8301)(604.10284, 15528.289)(605.10516, 2333.05)(605.6254, 9966.64)(606.6286, 1648.1616)(608.1202, 3381.077)(609.1252, 665.45)(649.10144, 748.50745)(630.11945, 1052.4767)(632.11957, 500.52002)(633.1296, 700.77)	7.56042
Luteolin 7-O-diglucuronide	Flavonoids	Flavones	302152	277792	276506	1	1	1	1	1	1	1	1	1	144794	148885	150727	1	1	1	178695	201729	218024	264231	235247	225402	1	1	1	1	1	1	1	1	1	1	1	1	(639.09674, 9866.223)(640.1024, 2514.8152)(624.1299, 12595.13)(622.1276, 3651.2266)(649.11774, 856.89667)	8.24867
Luteolin 7-O-(2-apiosyl-6-malonyl)-glucoside	Flavonoids	Flavones	202607	189980	184613	168097	150617	145469	655332	697521	687109	179681	207403	205058	111138	120787	133044	119690	107376	109733	1	1	272851	1	1	1	1	1	1	578230	601838	592599	108755	86521	92417	108070	116622	135887	(648.43774, 19821.973)(649.3839, 4518.5215)(669.1757, 1831.1844)(651.1459, 6977.2056)(652.14655, 3590.7854)(653.1447, 3930.2344)(654.14545, 701.1275)(692.406, 1627.7999)(693.1579, 1185.21)	17.4575
Apigenin 7-O-(6''-malonyl-apiosyl-glucoside)	Flavonoids	Flavones	714647	661827	647970	315676	284294	265579	1709330	1760053	1773101	740875	709921	671602	1165408	1212689	1290113	790475	746722	763061	865478	941648	992484	656246	512567	453386	425135	451844	504757	1406154	1454880	1415147	3709752	3661680	3511485	1	89475	97393	(651.1463, 8789.084)(652.147, 4798.4023)(653.1451, 3853.9727)(654.1455, 467.61667)(632.4384, 40521.4)(633.439, 11117.795)(634.4773, 4029.177)(636.1496, 1957.8716)(657.1648, 2436.5466)(673.14154, 10455.243)(674.14374, 5103.08)(661.1412, 1928.4135)	12.3888
Chrysoeriol 7-O-(6''-malonyl-apiosyl-glucoside)	Flavonoids	Flavones	371013	340911	329659	148019	133209	123610	316931	313350	318033	301786	283623	272387	128283	131878	145192	1	1	1	1	1	1	300451	277179	265154	1	1	1	1	1	1	838033	805491	776954	1	1	1	(662.14465, 17722.35)(663.147, 3493.0051)(664.149, 295.86)	7.598
Butein	Flavonoids	Chalcones	2685131	2630654	2533874	267719	1	1	4753985	4833125	4958175	2621418	2539231	1	1122212	1142591	1194132	567661	1094469	1171222	1	3797168	3937517	1	1	1	774030	879419	886543	2271597	2287396	2324842	13400000	13000000	1637317	387466	389387	167135	(272.79968, 96775.62)(273.95612, 12470.601)(274.07022, 1566.346)(258.0665, 1162.4266)(257.0676, 266.24)(273.08173, 13694.201)(274.08914, 4216.8877)(255.5703, 4238.7417)(257.06845, 572.87994)(296.3949, 1017.18555)(298.06104, 219.02998)(281.0522, 189.29)	9.3926
Xanthohumol	Flavonoids	Chalcones	838686	719729	748841	240274	224499	222191	409920	125971	115001	593918	584106	571193	311385	327882	331104	188986	179225	183646	1202264	1294392	1368729	651098	610966	602001	190242	803840	831340	600715	578513	605996	802726	774938	757970	1	1	1	(356.92517, 6970.632)(356.1477, 1419.38)(356.81067, 287.82)(338.9743, 4658.247)(338.81833, 759.44995)(340.4786, 1058.59)(341.1413, 1171.19)(357.3281, 994.05)(340.3509, 1913.65)(339.48105, 5888.6304)(377.93448, 8036.361)(378.43512, 2515.4985)(380.152, 1232.685)(382.1575, 322.2)(360.05402, 11711.537)(360.82037, 3118.798)(364.1415, 394.8)	7.17875
Phloretin	Flavonoids	Dihydrochalcones	780051	660031	666189	509937	492233	474087	409057	404757	395542	107580	107123	106226	274321	326289	312961	617896	464232	458954	736225	940181	1034619	447101	421173	388504	383635	866213	924008	189892	185792	193998	830057	776024	758684	842406	945914	969226	(275.32544, 13673.134)(278.0899, 22492.94)(279.1044, 626.3)(257.8423, 2003.3842)(259.078, 13263.563)(277.2331, 2381.8428)(279.1038, 869.22)(259.2713, 8246.827)(260.08917, 664.2943)(261.0933, 18437.32)(262.09756, 649.92664)(299.25812, 2838.9143)(300.00818, 3966.3894)(282.4096, 4180.852)(284.07407, 622.7867)	6.56708
Phloridzin	Flavonoids	Dihydrochalcones	979803	922692	895485	2542034	2162757	2053289	427019	442513	437882	396028	398144	372089	265419	278542	293768	1	1	1	3436653	3718182	3867390	1610460	1507843	1453695	1	1	1	218543	228673	210732	1494852	1479714	1413205	1	1	1	(419.7968, 26802.613)(419.70612, 13769.307)(420.13904, 1986.9701)(459.6084, 26349.979)(460.59238, 13550.466)(419.8862, 14182.243)(420.13773, 3211.7834)(438.1455, 36109.113)(438.14807, 13002.263)(442.62256, 3395.9375)(442.12766, 1486.895)	7.01357
Phloretin 2'-O-xylosyl-glucoside	Flavonoids	Dihydrochalcones	222171	213249	205997	504309	468692	452268	163346	165529	100073	168097	159094	153005	232671	233747	262742	275482	1	238457	2638439	2777534	2870059	274259	261416	253217	245673	288103	293908	191836	197833	196599	2020453	2787565	1898480	1	1	1	(568.4797, 10861.664)(569.3617, 3118.4968)(570.19135, 517.05994)(550.28754, 29585.219)(551.33246, 7330.867)(552.1697, 3053.3467)(554.99084, 3481.052)(555.19666, 1231.5167)(592.167, 3701.6433)(594.183, 4191.1196)(573.1609, 3468.4224)(574.15686, 4858.295)(575.1587, 451.495)	7.91073
3-Hydroxyphloretin 2'-O-xylosyl-glucoside	Flavonoids	Dihydrochalcones	228274	232451	204229	1	1	1	1	1	1	130250	123753	1	834279	186358	233855	1	1	1	1	1	1	1	355766	1	330833	420099	439840	1	1	1	1	1	1	1	1	1	(586.3805, 3799.6782)(587.5736, 5349.5938)(587.1652, 297.82)(570.17206, 1460.108)(588.1723, 8192.81)(589.1764, 1270.19)(570.009, 1774.6616)(570.1917, 395.72)(608.1618, 1311.4451)(592.16785, 2179.795)(593.1707, 230.9)	6.23146
Dihydroquercetin	Flavonoids	Dihydroflavonols	5257681	5095874	5041117	1235686	855159	821116	6146383	1922694	6139126	2601804	2922917	2922532	862249	892100	906041	9573164	9243583	9506154	8726769	8662055	9158251	1804231	1676825	1642261	694900	855586	1622109	2758433	2783108	2771794	15700000	15400000	15400000	1	452943	516886	(329.05273, 2322.4934)(287.0562, 163733.83)(288.0594, 27910.54)(289.0643, 7603.2993)(304.1262, 35423.816)(305.0573, 13121.88)(306.06015, 2341.34)(305.06546, 71832.06)(306.0701, 28429.49)(307.0721, 6947.0366)	7.72797
Dihydroquercetin 3-O-rhamnoside	Flavonoids	Dihydroflavonols	678286	668262	652948	401914	357918	353220	1509364	1536113	1545486	484666	469930	448456	159445	163593	163450	317730	314933	296771	2026653	2221898	2243603	390897	337458	347379	217223	250875	253617	682381	705826	2405960	1409335	1353801	1337039	396205	426183	434813	(450.27005, 16178.428)(451.11395, 3737.1755)(453.38297, 6816.7324)(452.1259, 2046.7267)(433.19446, 42426.605)(434.11737, 10268.893)(435.12106, 2314.3364)(479.11908, 16100.448)(455.9974, 12613.268)(460.09586, 13639.581)(461.1019, 3076.95)	8.03758
Dihydromyricetin 3-O-rhamnoside	Flavonoids	Dihydroflavonols	1065691	979920	963993	1837650	1634191	1566457	9133376	9363242	9173584	2096124	2032288	1941425	290119	298029	294470	7158184	7023835	6880829	3378840	3646392	3767855	1613323	1418806	1421790	2289378	2596358	2691438	7972364	8140108	8253448	42800000	41500000	40700000	1724020	1810554	1884605	(466.46066, 32250.93)(467.1088, 35426.12)(468.11142, 4041.25)(469.113, 1545.59)(449.27667, 280182.6)(450.27982, 61775.758)(451.11423, 13715.329)(452.11758, 5748.9766)(495.11307, 341.99332)(471.08963, 6634.1455)(472.09525, 2776.4058)	7.49925
Daidzein	Flavonoids	Isoflavonoids	636655	577552	549435	342955	280325	251391	724156	725008	715270	2722375	1	1	464698	280961	285981	1	1	1	327431	357560	384272	243116	214675	198982	1	1	1	242972	538498	548157	1010144	976960	949386	3768116	4183138	4324451	(257.51385, 2607.552)(259.07556, 1981.71)(237.54875, 2145.6548)(239.0519, 166.47)(256.46283, 4487.251)(256.73563, 312.38)(241.19252, 2072.0212)(280.04993, 136.26666)(259.04245, 11500.326)	2.60886
Formononetin	Flavonoids	Isoflavonoids	5599717	5208778	5175800	399021	366465	346345	118431	133532	153689	1	1	1	361597	375782	387029	489016	450917	450243	1	1	1	1	1	1	219276	246691	254232	329349	328433	183780	3952615	3890129	3819925	449783	490667	504639	(272.41394, 1504.1545)(253.56978, 6851.332)(274.09323, 9456.601)(252.68456, 24702.568)(252.07657, 10911.215)(253.06964, 7174.9634)(292.26633, 2522.0159)(296.08105, 615.0767)(273.55328, 28869.701)(274.30817, 8023.3574)	2.9235
Daidzin	Flavonoids	Isoflavonoids	114758	110440	111438	1	1	1	383180	384176	405151	1	1	1	1	1	1	1	1	1	2268330	2432901	2497263	1	1	1	1	315248	290240	586094	573943	586166	1	1	1	94737	1	1	(418.4836, 4496.6826)(418.6077, 1386.6068)(398.0908, 5838.89)(420.49603, 2786.6096)(401.54745, 3509.8672)(442.4426, 330.02)(424.09262, 243.13335)	4.24938
Glycitin	Flavonoids	Isoflavonoids	1492273	1378173	1368583	1	137330	132928	6390587	99977	88947	187943	173202	1518878	8594542	9187482	9180626	8393737	8103812	8016249	1194330	1305239	1345870	105891	93617	1	122013	78338	1	5877805	5840809	5866495	206275	203041	203740	170228	181377	192182	(446.40958, 4560.546)(447.32257, 1471.0039)(432.1834, 6023.569)(433.7897, 5819.615)(448.12698, 20678.21)(450.1394, 7267.2964)(452.14624, 771.0)(434.37836, 987.28503)(471.85074, 6630.736)(473.1189, 2052.966)(475.1154, 877.29)(452.1516, 212000.53)(452.09164, 52916.375)(453.09433, 9828.904)(454.09567, 1570.4966)	10.1476
6''-O-Acetylgenistin	Flavonoids	Isoflavonoids	329139	298300	295275	886704	102255	267532	307420	321334	315895	182719	1	137466	1	1	1	189900	230095	414259	1	1	251070	123491	1	105616	271394	99964	102965	1	318230	338289	321090	1639628	535400	241420	252097	1	(477.6813, 19828.078)(479.04935, 4240.7593)(456.73428, 15057.068)(457.6135, 3047.6816)(459.1042, 1827.27)(459.01318, 7736.4565)(459.79764, 3375.3733)(463.1239, 364.39)(497.68625, 6217.1455)(498.11685, 460.00333)(481.2525, 49274.66)(482.1026, 14577.309)(483.11102, 6789.0283)(484.8609, 1084.5675)	7.40966
6''-O-Acetyldaidzin	Flavonoids	Isoflavonoids	16400000	15400000	15200000	207511	198522	184931	469459	480209	469965	396373	398068	372155	14100000	15100000	15500000	1639239	1619085	1541212	22100000	23600000	24300000	246664	229538	224174	1520799	1660981	1744533	428555	426511	429702	323717	298552	885976	331682	363208	390768	(481.48444, 379503.3)(482.10254, 150171.92)(483.10434, 30636.135)(484.1073, 3612.4111)(442.1144, 1346.75)(459.37442, 23815.22)(459.1273, 7883.6016)(459.12943, 24435.424)(460.13284, 5241.1562)(464.59976, 112804.31)(465.60342, 149876.45)(467.1101, 42725.86)(468.1129, 5303.9497)	8.20575
6''-O-Acetylglycitin	Flavonoids	Isoflavonoids	217669	1	1	167383	164752	143423	1	1	1	1	1	1	248429	256122	260340	257803	260456	233750	1	1	1	150618	134656	118290	1	1	1	178285	185586	193922	356069	336724	338706	1	1	1	(488.8808, 7505.259)(489.13394, 1878.5948)(473.1304, 2973.57)(474.14096, 3215.93)(472.1323, 5904.6313)(472.13242, 2345.14)(512.6999, 6750.3013)(513.1313, 1505.5518)(495.11307, 643.75336)	7.11535
6''-O-Malonyldaidzin	Flavonoids	Isoflavonoids	145924	220115	1	217601	203945	193718	2278460	2308964	2267850	185875	189178	356416	426856	746122	747448	327435	317952	309914	772969	821918	860947	759940	676478	618668	140080	166702	179078	91747	1398185	1392250	1	189404	190143	274722	300112	338261	(503.69324, 15262.633)(504.6316, 5164.299)(505.10657, 4324.497)(506.10684, 3517.2402)(487.5175, 5893.486)(486.11356, 1336.355)(487.1114, 603.39)(505.44986, 18926.11)(504.1092, 23556.574)(487.11502, 8729.318)(486.11252, 1571.75)(529.0966, 464.5)(507.105, 945.72504)	17.997
6''-O-Malonylgenistin	Flavonoids	Isoflavonoids	1	1	1	399240	367951	364793	773927	583436	777881	114331	133216	184610	245384	266992	262914	88810	181849	182844	753415	263224	283015	1309859	1299788	1340071	541587	480503	93557	81612	86454	578022	1217522	115713	142876	2742401	2402451	2180690	(519.1121, 19082.79)(520.1155, 3621.3699)(503.10815, 24924.88)(504.10873, 20934.33)(505.1066, 14456.353)(506.10654, 4580.02)(521.13293, 415.125)(503.50824, 22578.377)(503.44058, 33177.918)(505.10687, 34555.35)(506.1066, 10474.952)(507.10474, 2961.9824)(544.869, 425.4175)	21.0252
6''-O-Malonylglycitin	Flavonoids	Isoflavonoids	1	1	1	1	1	1	1	1	1	1	1	1	1	1	1	1	1	1	1	1	125632	1	1	1	261122	333820	367853	1	1	1	2499309	2499065	2395724	416683	465581	505966	(557.1205, 3246.1433)(558.12305, 603.79)(559.1205, 158.71)(516.13135, 6677.8)(517.52167, 2319.34)(518.1297, 416.03503)(533.1178, 4482.879)(534.1327, 339.18)(536.9775, 798.5883)(539.148, 1342.04)(543.13214, 6433.745)	2.32885
Galangin	Flavonoids	Flavonols	15600000	15100000	14700000	1	1	1	27300000	27200000	27800000	104195	326516	99895	6364963	6535187	6837487	1	1	1	20600000	348596	22100000	112925	103119	84418	1	1	1	12900000	13000000	13400000	74500000	61900000	72000000	1159955	1203831	1246826	(270.89285, 547950.0)(272.06488, 103942.63)(273.06744, 13903.686)(274.07074, 384.16666)(252.03986, 6338.505)(271.0611, 597941.94)(272.06467, 135888.53)(273.06686, 39447.484)(274.06927, 3382.29)(294.2478, 4172.139)	10.6884
Kaempferol	Flavonoids	Flavonols	2528948	1843682	1836446	3557883	3297514	3171911	6333810	6289217	6343552	819319	787624	783368	745016	776684	790103	3031317	2905052	3407691	8326696	8620812	9105623	647620	602249	343114	957574	1038898	1	2715624	2742855	2736383	1806100	1759659	1743161	1	1	1	(287.05634, 119942.11)(288.0596, 18018.576)(289.06223, 9680.474)(271.04504, 438.6)(293.03012, 21158.273)(294.03336, 2371.633)	7.77591
Kaempferide	Flavonoids	Flavonols	728340	694500	677903	1	952060	333308	1880036	1943194	1956718	749485	739224	720731	1561786	1682578	1692163	860943	841399	856185	278549	278896	693568	500077	468785	363765	557296	610133	337664	2242212	2337041	2391396	1871081	1742825	1713385	624560	788886	1	(299.05127, 54340.914)(300.04877, 25284.43)(281.04938, 12232.192)(282.05283, 3722.5273)(283.04987, 1213.5029)(305.08444, 7038.793)(284.0637, 1119.8066)(327.0596, 1276.27)	11.8884
Morin/Quercetin	Flavonoids	Flavonols	6041902	5533503	5481516	5705978	685141	681358	389048	410710	417829	8155334	7821171	7818462	2223474	2369474	2378204	9993639	523941	9194424	5418906	5759479	5994354	1979461	274590	239147	7564390	8281652	8507773	29700000	30400000	30700000	1918556	1879049	1853204	725413	822314	870766	(302.8921, 407565.06)(304.05432, 75117.414)(305.0573, 11342.0625)(306.0591, 1820.8833)(284.0352, 22817.752)(285.03845, 4866.7666)(303.05078, 141067.94)(304.0548, 27720.654)(305.05746, 7223.317)(286.5447, 6970.5034)(328.03543, 2028.9982)(309.7753, 355.34998)	6.23858
3,7-Dimethylquercetin	Flavonoids	Flavonols	449007	409854	402109	1	1	1	241390	706957	713827	134322	127323	121962	301794	309548	707809	1	1	1	170018	181499	181686	389838	368533	351785	1	1	1	106964	107907	102129	658576	646641	621576	766851	420926	444290	(330.5756, 18564.615)(331.57925, 1839.7484)(314.93942, 12516.965)(316.16458, 2699.497)(331.08185, 3990.955)(314.77325, 16469.426)(315.5778, 3263.6848)(354.2092, 12050.767)(354.57068, 1805.5625)	6.69941
6,8-Dihydroxykaempferol	Flavonoids	Flavonols	4942981	4716829	4400823	17700000	16500000	16100000	46500000	25600000	47800000	52100000	52200000	50400000	21500000	22500000	23600000	62100000	25800000	25700000	9445843	10000000	42500000	3351908	3085334	13600000	40100000	44000000	45100000	46800000	46800000	47900000	1382310	1355835	1372768	252923	283540	306124	(342.02994, 3837.4065)(342.019, 656.5833)(302.04303, 280.85)(319.0463, 691384.4)(320.04944, 111363.734)(321.0515, 17173.375)(322.05365, 1920.72)(328.03552, 394.8867)	8.78016
3-Methoxysinensetin	Flavonoids	Flavonols	1	191900	184793	1	1	1	546626	546016	540158	1	1	1	382879	699528	746320	1	1	1	144109	370123	166882	145021	126651	127950	1	1	1	304846	324460	318824	129921	123253	298080	1	1	1	(403.42462, 6775.387)(404.8108, 489.00333)(406.14954, 692.05005)(384.41766, 9444.373)(385.69186, 2646.0671)(388.1345, 532.8)(404.39316, 12467.11)(404.14563, 3624.1367)(405.13794, 1216.5034)(387.14447, 10745.969)(427.123, 9179.799)(428.12576, 3104.99)(429.12766, 332.85)(408.54153, 4860.642)(410.71356, 37195.57)(412.115, 11529.333)	5.3835
Kaempferol 3-O-rhamnoside	Flavonoids	Flavonols	1	1	282874	1	1	1	1	1	1	164430	171493	158751	1	1	1	349249	345394	330199	1	1	1	1	1	1	1	1	1	1	1	1	2785088	2701588	2656353	1	1	1	(431.5917, 34593.664)(432.59286, 6788.686)(433.1038, 2430.6433)(413.08713, 20594.154)(414.0903, 3677.6133)(459.0929, 67669.12)(460.09595, 14198.44)(438.08548, 1337.9066)	9.82483
3-Methoxynobiletin	Flavonoids	Flavonols	482580	450892	433002	597472	550395	529917	409430	405975	409009	214740	197805	190752	1	84198	1	1	1	1	136431	139985	143416	724261	684068	649946	1	1	1	1	1	1	260586	256578	255699	1	1	1	(432.7738, 17479.963)(433.1454, 5243.3584)(415.126, 651.38)(435.165, 5616.0)(417.29556, 91135.52)(417.95694, 33863.418)(419.16064, 6365.8145)(458.93335, 25666.062)(460.43582, 17207.264)(460.13956, 44001.156)(461.14474, 13053.856)(437.13013, 9528.866)	5.74411
Quercetin 3-O-xyloside	Flavonoids	Flavonols	1570159	1499358	1474586	340952	287549	266431	3037832	3154013	3090975	112854	105161	93920	1559340	1624494	1711708	1358260	1309090	1252837	2021347	2170863	2228683	358720	313430	304937	270094	336293	343026	2459547	2498015	2475245	423662	434782	422061	171228	192681	212633	(435.0861, 19480.607)(436.09586, 14031.91)(437.09802, 1708.7599)(435.09338, 94667.89)(436.0965, 19592.148)(437.0993, 3050.2036)(422.0909, 5435.962)(457.27737, 5320.26)(458.75238, 549.7978)(461.08997, 202.86668)(439.0696, 3296.28)	6.7225
Quercetin 3-O-arabinoside	Flavonoids	Flavonols	1570159	1499358	1474586	340952	287549	266431	3037832	3154013	3090975	176246	165754	147816	1559340	1624494	1711708	1358260	1309090	1252837	2021347	2170863	2228683	358720	313430	304937	1	1	1	2459547	2498015	2475245	423662	434782	422061	171228	192681	212633	(435.08832, 31683.379)(436.09586, 14031.91)(437.09802, 1708.7599)(435.09335, 84147.28)(436.0965, 19592.148)(437.0993, 3050.2036)(422.0909, 4263.871)(457.29977, 5186.6147)(458.75238, 549.7978)(461.08997, 202.86668)(439.0696, 1930.4535)	6.845
Kaempferol 7-O-glucoside	Flavonoids	Flavonols	5644558	5446279	5249334	372875	348282	227624	23400000	23700000	23400000	387721	352127	342596	7634786	7989288	8317018	409587	345326	343149	18300000	19400000	19900000	440664	233956	401919	218796	237553	255403	11400000	11500000	11800000	1345669	1366077	1306385	233884	284779	431894	(447.0933, 355116.84)(448.0966, 78338.06)(449.09998, 22232.268)(450.10208, 2251.9148)(429.08795, 9398.676)(430.08978, 2353.0366)(431.08752, 869.76733)(457.07913, 11929.216)	14.3979
Kaempferol 3-O-glucoside	Flavonoids	Flavonols	1060011	1036766	1003617	1837650	1634191	1566457	9133376	9361910	9171627	2069462	2013644	1923142	1607145	1687953	1746304	1905170	1786442	1685445	3378840	3640610	3762152	1613323	1418806	1421790	2260406	2558406	2651944	7967082	8140108	8253448	44700000	43600000	42700000	1778484	1870308	1949782	(448.67477, 83401.2)(449.67746, 16901.543)(450.6797, 1934.4971)(435.09293, 14760.426)(449.10886, 344140.66)(450.11206, 76011.62)(451.11435, 14131.899)(452.11758, 5748.9766)(432.55682, 25802.592)(432.9078, 10966.229)(433.1038, 2430.6433)(471.09064, 7207.466)(472.0963, 3191.97)	7.64867
Myricetin 3-O-arabinoside	Flavonoids	Flavonols	1425664	1313747	1293657	291902	1	1	6407832	6534670	6481656	1623677	1593994	1519144	8809399	9431654	9422181	8465522	8154277	8048184	2033169	2206014	2262129	153373	142290	136087	189940	211236	210106	6036046	5992617	6025439	1	1	1	1	1	1	(451.0103, 119757.14)(452.0914, 26745.068)(453.09348, 9433.068)(454.09567, 1570.4966)(437.0906, 4509.715)(451.08847, 222170.53)(452.09167, 45747.953)(453.0944, 8581.09)(454.0963, 282.48)(438.08554, 958.35004)(473.38614, 4744.7563)(457.0765, 810.97003)	5.93627
Isorhamnetin 3-O-galactoside	Flavonoids	Flavonols	778798	718868	744744	4232676	3849340	3658176	1443804	1505217	1505299	2414155	2292356	2215791	1	1	1	1	1	1	2066253	2216412	2323486	3617239	3292025	3266071	1	1	1	1	1	1	30500000	29900000	29600000	1539352	1682668	1764920	(460.8871, 47863.992)(462.1009, 11404.186)(462.10165, 692.58997)(479.1193, 337176.8)(480.12256, 78798.77)(481.1167, 39536.43)(482.11606, 12863.747)(461.1078, 25081.531)(462.11148, 10584.097)(463.1152, 459.98)(501.10052, 2319.13)(502.10382, 173.91)(485.23233, 5150.604)(485.77524, 1652.4033)	6.13
Isorhamnetin 7-O-rhamnoside	Flavonoids	Flavonols	778798	718868	744744	4232676	3849340	3658176	1443804	1505217	1505299	2414155	2292356	2215791	160617	162652	194491	488384	460892	442789	2066253	2216412	2323486	3617239	3292025	3266071	415133	479716	502113	669148	674830	678926	30500000	30000000	29600000	1539352	1682668	1764920	(462.06534, 33087.234)(462.1022, 10288.076)(462.10165, 692.58997)(502.1027, 2007.2778)(502.10382, 173.91)(461.1078, 25081.531)(462.11148, 10584.097)(463.1152, 459.98)(479.11914, 204368.83)(480.12234, 47358.633)(481.1167, 39536.43)(482.11606, 12863.747)(485.23233, 5150.604)(485.77524, 1652.4033)	6.88167
Quercetin 3-O-galactoside	Flavonoids	Flavonols	21500000	20300000	20000000	5733428	5334320	5104715	17400000	17900000	17800000	14300000	14200000	13600000	10100000	6547543	6823859	27700000	27200000	26500000	24200000	25700000	26900000	5462458	4959924	4788795	12100000	13100000	13900000	9360061	21100000	9684301	5548863	5558371	5464650	600187	661742	666093	(464.5973, 16553.873)(466.10608, 6474.7437)(451.08792, 67928.305)(452.09152, 14907.73)(465.10406, 533469.6)(466.10724, 117943.766)(467.1092, 23826.475)(468.1119, 3416.3599)(449.10535, 128693.94)(448.09644, 83335.14)(449.09952, 17437.348)(450.10217, 968.66504)(487.0853, 20245.732)(488.08868, 4705.7124)(469.0744, 729.84)	7.08678
Quercetin 3-O-glucuronide	Flavonoids	Flavonols	1	1	1	175516	161900	152999	1	1	1	1	1	1	1	147426	1	79420	75880	70785	1	1	1	1	1	1	211344	217504	246109	1	1	1	116850	138507	144802	1	1	121534	(478.3552, 6296.1494)(480.07333, 2072.7332)(481.0707, 1930.4067)(461.0733, 244.0)(481.07568, 9853.277)(484.50238, 953.704)(485.1093, 1746.46)(505.0788, 11390.07)	5.48709
Myricetin 3-O-glucoside	Flavonoids	Flavonols	17200000	16200000	16000000	814838	744654	665243	14400000	14800000	14900000	5830402	5626732	5382036	14700000	15700000	16200000	6755072	6467503	6111692	22900000	24400000	25300000	2138165	1895397	1847976	3498812	3904060	3979447	21800000	22000000	22100000	947086	893608	894370	220501	254401	264103	(481.07996, 9391.656)(467.08316, 602.05664)(481.10007, 387021.4)(482.1028, 85617.02)(483.10416, 18134.318)(484.10712, 3592.6016)(465.10358, 3845.8103)(466.10635, 1164.1833)(503.24664, 15558.066)(504.08353, 4436.4043)	6.429
Kaempferol 3-O-acetyl-glucoside	Flavonoids	Flavonols	1	1	1	1	1	1	916534	960704	948097	1	1	1	459711	463204	503423	1	1	1	1	1	1	238451	222745	212216	1	1	1	340968	330891	329170	640058	629923	607439	1	1	1	(492.61465, 7695.6265)(496.11658, 2266.9001)(473.1017, 9564.931)(475.10718, 5494.1)(477.10355, 628.17)(491.12888, 14011.664)(492.1316, 2106.7068)(476.11472, 25452.37)(474.1123, 11118.097)(475.116, 971.2933)(519.13055, 1982.16)(495.10007, 1519.7035)	4.75622
Isorhamnetin 3-O-glucuronide	Flavonoids	Flavonols	1	1	1	1	1	1	1	1	1	1	1	1	1	1	1	1	1	1	1	1	1	1	1	1	1	1	1	1	1	1	256091	251722	238795	1	1	1	(498.08585, 7476.4297)(499.0836, 6654.9297)(500.085, 1469.0934)	1.456
5,3',4'-Trihydroxy-3-methoxy-6:7-methylenedioxyflavone 4'-O-glucuronide	Flavonoids	Flavonols	838000	780639	778929	1	1	1	455737	451352	458367	167290	1	1	629366	643504	670237	188564	184108	1	800952	847764	905513	1	1	1	252323	273841	279684	994908	991920	999884	1	1	1	586848	418587	556225	(503.08032, 22827.611)(504.08353, 4158.392)(525.1177, 728.1433)(505.10062, 1362.4166)	11.2332
5,4'-Dihydroxy-3,3'-dimethoxy-6:7-methylenedioxyflavone 4'-O-glucuronide	Flavonoids	Flavonols	1	1	1	112259	1	1	1	1	1	1	1	1	1	1	1	88223	97203	97281	1	1	324320	176828	158359	146996	1	1	1	1	1	1	116097	113533	115602	276035	321821	333981	(538.12134, 1089.528)(519.1017, 2993.28)(539.24664, 20108.021)(520.6685, 32244.701)(522.3694, 32977.28)(523.1174, 29234.875)(557.09503, 11081.716)(558.0959, 4294.7734)(543.101, 11046.477)(544.10126, 4221.5166)(545.0991, 2511.0767)	19.5424
Jaceidin 4'-O-glucuronide	Flavonoids	Flavonols	231582	211605	208790	1179171	1093865	1041172	475315	490991	486405	1266967	1220538	1204451	602995	599769	604421	1972620	1941593	1901020	446520	483922	512482	886761	817796	788211	1102142	1209383	1266814	562768	533965	553271	674398	647786	656836	1789433	1951993	2076129	(540.0886, 9329.232)(541.0833, 2608.1694)(542.0176, 861.51434)(521.11896, 26818.205)(522.11945, 12055.234)(523.11743, 8134.654)(524.1186, 2429.3174)(525.1169, 761.26855)(543.10114, 2729.8135)(544.10144, 1370.8688)(545.0993, 880.7226)	22.312
Kaempferol 3-O-xylosyl-glucoside	Flavonoids	Flavonols	650123	599813	582101	194431	189702	176328	2188894	2230693	2265766	1366765	1301548	1281186	2501030	2647891	2766025	300917	296552	291150	893245	947886	1029137	105320	106589	104579	1	181355	196551	1351710	1374511	1443228	86382	1	1	294817	341956	350041	(582.15344, 12434.743)(583.1541, 6130.183)(584.1522, 4123.902)(585.1519, 1449.0933)(565.0106, 4849.3623)(565.15875, 2247.5999)(585.1257, 59779.477)(586.12836, 18916.713)(587.13104, 3677.4287)	15.9548
Kaempferol 3-O-sophoroside	Flavonoids	Flavonols	5864410	5332059	5175071	6958777	6384365	6194290	1810482	1860040	1140213	5861381	5675307	5540167	3938726	3994167	4091805	10900000	10700000	10500000	4469021	4886640	5112152	3340771	3143232	3053821	3908353	4225510	4493357	1093103	1092291	1093233	3705071	3439312	3379809	6576536	7220810	7492679	(595.14154, 6453.9155)(596.3498, 3390.3242)(598.1464, 6374.329)(611.97723, 180863.72)(612.9784, 88775.96)(613.9772, 60049.566)(614.97736, 21902.234)(616.1617, 9981.884)(597.7171, 6272.4946)(599.00574, 2857.5398)(599.1493, 4034.29)(633.1374, 13514.894)(634.14417, 2562.4033)(617.25085, 10374.6045)(617.84015, 3988.627)	18.9588
Quercetin 3-O-glucosyl-xyloside	Flavonoids	Flavonols	2603134	2483225	2402472	449451	396721	364338	518003	540795	609931	299733	281173	272335	1432329	1515045	1584270	661931	666392	694413	1834909	2099811	2164466	1794696	1774437	113864	667109	728566	1266408	1074230	1108158	1076053	119852	126077	2606917	915643	464145	1035860	(596.56903, 12710.22)(599.149, 21655.645)(600.1472, 16530.31)(601.1469, 5444.3433)(602.14545, 767.39996)(579.62646, 1303.6552)(581.6291, 410.365)(597.67804, 5345.716)(600.1661, 3641.2776)(601.1622, 615.41)(579.12524, 1259.1534)(580.1248, 183.58)(619.11914, 3139.9277)(620.1184, 1198.585)(601.1201, 50962.344)(602.12317, 14009.754)(603.1252, 3976.8433)	15.848
Quercetin 3,4'-O-diglucoside	Flavonoids	Flavonols	3083429	2912971	2876601	333494	292535	279594	2065116	2090107	2063662	2699972	2574420	2504095	4062252	4276123	4488973	122589	120729	3072220	1863234	2000822	2110590	264511	235708	222119	162226	196238	199473	1303701	1287812	1273524	194736	183113	186900	664496	781487	788800	(609.1464, 695.78326)(627.9664, 82001.016)(628.9674, 22782.62)(629.44885, 7536.118)(630.16547, 376.70667)(612.1637, 1712.09)(649.135, 7249.7153)(650.1418, 2537.83)(631.7652, 49369.273)(632.1337, 16507.266)(633.135, 7606.6274)(634.1384, 1389.2201)	9.46894
Quercetin 3-O-xylosyl-glucuronide	Flavonoids	Flavonols	18700000	17800000	17200000	1465464	1315715	1234256	15900000	16500000	16600000	6525295	6372442	6042365	20500000	21300000	21900000	11100000	10700000	9906168	16700000	18200000	19100000	1946237	1716151	1645799	523625	600072	609632	10200000	10200000	10300000	349355	340091	333099	1705273	2064131	2157619	(611.1412, 45660.72)(612.14386, 13368.401)(613.1451, 2246.0)(633.11127, 322338.47)(634.1136, 105963.35)(635.11566, 30724.246)(636.118, 5917.599)	5.8845
Isorhamnetin 3-O-glucoside 7-O-rhamnoside	Flavonoids	Flavonols	249528	169470	227891	1190952	1086646	1040100	3790612	1449491	4030612	2227752	2262239	2239191	1164823	1134709	1167295	3696295	151904	146614	1615075	1699556	1814358	757192	718145	683633	1138880	1252376	1308707	611361	915518	1548392	1390862	1390394	1366821	843514	947988	965986	(626.006, 39257.387)(627.007, 20357.457)(628.08417, 15111.261)(629.1787, 5468.9907)(630.1772, 1606.195)(611.83044, 403.30997)(625.77924, 73194.66)(626.7809, 32686.621)(627.7798, 19547.135)(629.1791, 15611.092)(630.1775, 5678.8193)(611.66376, 126981.16)(612.41583, 78955.625)(613.1684, 8715.187)(647.14526, 5224.4976)(630.6477, 1965.0526)(633.6451, 2937.54)	19.258
Quercetin 3-O-(6''-acetyl-galactoside) 7-O-rhamnoside	Flavonoids	Flavonols	1344401	1254777	1207557	190172	1	152426	1242424	1283025	1305618	732156	734765	737294	343634	366767	376305	515090	545796	554428	2202390	2411226	2524380	296382	281919	268123	259081	273779	327807	657803	639342	657617	181618	192925	198301	578985	655225	695906	(634.1529, 12473.163)(635.1499, 8911.306)(636.14966, 2335.9243)(637.1484, 630.73)(675.16693, 11517.135)(676.16534, 4858.015)(657.25244, 41235.023)(658.25543, 12922.675)(659.2951, 3507.8235)(660.1577, 705.78)	15.7762
Kaempferol 3-O-(6''-acetyl-galactoside) 7-O-rhamnoside	Flavonoids	Flavonols	215105	207011	196839	1	1	1	298370	284678	276811	1	1	1	1	1	89066	143217	124854	85041	828363	892414	944599	263133	233249	237133	1	1	1	86186	82806	1	1055248	1020469	1011644	1	1	1	(638.8818, 22257.291)(640.16705, 6664.685)(619.48663, 5657.92)(620.48486, 2384.89)(624.1871, 734.89)(660.50995, 2088.9065)(660.1694, 723.95)(641.1516, 17869.234)(642.1549, 5174.28)(643.15704, 2034.3232)	13.5833
Kaempferol 3-O-xylosyl-rutinoside	Flavonoids	Flavonols	580831	503943	526181	5474542	5139480	4908805	1167944	1217162	1205010	5763215	5704918	5596078	2131573	2662140	2136956	7349586	7236821	6937307	1480959	1548455	1185973	2084355	1953012	1870973	2326380	2536625	2739132	1435485	1446836	1455754	2340904	2263349	2231731	3552503	4040656	4166853	(742.2458, 263.88998)(763.2021, 38213.934)(764.2006, 17235.781)(765.1935, 2059.708)(766.1799, 168.21667)(746.1873, 29264.334)(747.18774, 19701.29)(748.1861, 16242.167)(749.1857, 7094.9307)	24.993
Kaempferol 3-O-glucosyl-rhamnosyl-galactoside	Flavonoids	Flavonols	1701608	1534575	1500662	41800000	37400000	36000000	8954743	9132457	8830306	42300000	41100000	40300000	7933206	8170565	8373360	66600000	63900000	62500000	8404289	8671306	8984227	5372491	5057095	4908601	4350000	4810306	4941750	5030021	5017729	5023759	20400000	20200000	20200000	12900000	15000000	15600000	(743.20306, 4441.322)(742.1971, 3370.5261)(743.1953, 2468.0264)(744.20654, 17453.795)(742.8694, 4715.6943)(743.87036, 2837.2778)(744.20776, 15385.702)(745.2085, 10554.61)(758.2245, 439526.5)(759.22504, 320728.25)(760.2236, 261603.47)(761.22327, 125042.06)(762.22144, 56982.57)(763.2187, 20607.748)(764.21356, 7763.8164)(765.19244, 4524.73)(766.18396, 2056.688)	27.015
Quercetin 3-O-xylosyl-rutinoside	Flavonoids	Flavonols	186814	184572	175518	4941814	4552636	2680670	1117983	1120236	1110510	4514398	4371589	4288412	746987	769296	768545	3443379	3319322	8129023	1155086	1216616	1248532	1167734	848125	1037622	1332153	1465618	1617636	818765	840214	804507	2089533	2013726	2036888	2217452	2503869	2575982	(744.32275, 30582.516)(745.9182, 26709.738)(746.2066, 22431.36)(747.20624, 9841.6045)(748.2046, 4000.4226)(730.192, 1666.6614)(743.44885, 16770.758)(745.2079, 41698.215)(746.2061, 33322.85)(747.2057, 14934.08)(748.20416, 6088.0303)(749.20233, 1305.085)(729.5985, 1697.4199)(731.2193, 3916.4167)(765.1894, 7346.259)(766.17957, 2757.206)(767.1784, 654.89166)(749.9491, 1102.05)	24.0735
Kaempferol 3-O-(2''-rhamnosyl-6''-acetyl-galactoside) 7-O-rhamnoside	Flavonoids	Flavonols	1136668	1060448	1048681	1	1	1	1	1	1	1	1	1	170632	175559	192014	691909	1	1	1	1	1	1	1	1	146071	159335	175476	293626	298219	294000	1	1	1	300379	344851	374395	(767.12115, 10108.77)(768.2024, 3249.1667)(769.1856, 6690.663)(770.1916, 2449.3499)(789.2107, 1431.4166)(767.20087, 32153.322)(768.20306, 11851.097)(807.1899, 3622.49)	6.45448
Kaempferol 3-O-sophoroside 7-O-glucoside	Flavonoids	Flavonols	90933	1	1	828105	212476	284006	823311	862677	827399	1701579	1663450	1631545	745308	758877	781153	1658270	1617796	1570983	217503	227216	242383	431620	424967	401221	512403	573502	626052	427233	441290	447039	853462	819783	808476	889506	972367	482347	(774.21893, 22103.02)(775.2196, 15697.405)(776.21796, 12629.398)(777.2175, 5300.16)(778.2159, 1945.7938)(760.2026, 555.3164)(776.49945, 29651.654)(775.22015, 38458.918)(776.21857, 31331.81)(777.2181, 14247.796)(778.2164, 5846.1367)(779.2078, 1538.6017)(760.2113, 3841.2725)(761.2102, 2003.4899)	26.358
3-Hydroxybenzoic acid	Phenolic acids	Hydroxybenzoic acids	1	1	1	1	1	1	1	1	1	1	1	1	1	1	1	1	1	1	1	1	1	1	1	1	1	1	1	1	1	1	1	1	1	2276023	2516778	2716493	(139.03984, 52004.207)(140.0452, 3599.2366)(121.0292, 17235.979)(122.0327, 2601.55)(147.02412, 12109.789)	4.49456
2-Hydroxybenzoic acid	Phenolic acids	Hydroxybenzoic acids	1	6178191	5347974	7518090	1	1	1	1	1	1	1	8660855	1	1	1	1	2019618	1962441	1	1	1	1	1	1	3673430	4078227	4348057	1	1	1418096	4762551	4628260	4435131	2276023	2516778	2716493	(139.04, 102721.56)(140.04437, 8559.069)(141.05571, 346.33145)(121.029366, 6870.497)(122.03043, 1187.3168)(146.86958, 4794.567)(147.0247, 7040.92)	4.65289
2,4-Dihydroxybenzoic acid	Phenolic acids	Hydroxybenzoic acids	1	1	1	292467	261945	244881	1	1	1	556280	322458	330572	978663	1028531	1106581	151530	144091	130136	1	1	1	211834	1	1	1	1	1	897578	926173	1	1	1	1	997420	1108336	1197636	(154.0228, 10944.563)(155.03476, 8898.901)(138.13786, 2623.3987)(142.03346, 2298.22)	3.676
Protocatechuic acid	Phenolic acids	Hydroxybenzoic acids	1	1	1	292467	261945	244881	574227	563253	572171	556280	322458	330572	978663	1028531	1106581	151530	144091	130136	1	1	1	211834	1	1	1	1	1	897578	926173	1	2872900	2771118	2750264	997420	1108336	1197636	(154.0228, 10944.563)(155.03477, 9901.404)(137.85947, 11589.915)(139.36295, 2186.6865)	4.06945
Vanillic acid	Phenolic acids	Hydroxybenzoic acids	10900000	1624665	2115809	7435178	6645836	6346645	9501699	9891894	9764528	6755271	6409960	6384524	1056176	1086381	1132092	1254674	1194555	1119966	1656773	1790430	1872966	1479530	1290743	1230398	1647382	1753651	1851948	12400000	12600000	13100000	6566132	5295218	5375907	1413259	1527583	1625440	(168.54092, 1197.6426)(169.41513, 86004.19)(170.05516, 10210.458)(171.05577, 1712.0634)(151.03986, 25402.121)(152.04309, 1985.1047)(195.04166, 7410.375)(195.0419, 2101.58)	5.13475
Gallic acid	Phenolic acids	Hydroxybenzoic acids	1033929	1022623	1010211	780841	7902740	7228692	1437721	1185057	1953632	3903301	3806030	3726817	2619668	2742518	2670594	1818557	1728422	1632726	1227609	6646674	1431336	7211592	6011739	5468906	1	918731	926090	1895653	1879396	801545	5473555	5339597	5214323	1538030	1	1	(172.62956, 3273.2)(174.28345, 540.4525)(171.0299, 15482.4795)(172.02307, 2128.4036)(153.01927, 44640.72)(154.02267, 2646.3977)(155.0352, 182.595)(198.02776, 779.9533)	4.88191
Syringic acid	Phenolic acids	Hydroxybenzoic acids	1738176	1011859	2343249	587817	543553	528972	811208	836748	341179	2271986	2189229	2159669	480597	370377	358154	836572	803836	747383	553745	348416	616218	3832767	3491493	3219476	1169886	373455	417680	2750953	2779338	2838257	680053	629231	601621	1318805	1463900	1576368	(199.24025, 3768.3936)(180.03862, 9390.143)(181.04114, 2224.3132)(199.06136, 12840.051)(200.06348, 2123.5571)(201.0731, 55.16)(181.56596, 15419.75)(183.94106, 17219.346)(222.20168, 2995.2642)(224.0481, 874.59)(207.27155, 12470.601)	4.4915
4-Hydroxybenzoic acid 4-O-glucoside	Phenolic acids	Hydroxybenzoic acids	327100	314921	297345	2689082	2496608	1	1	2546634	2543050	7782204	7479387	4853721	4432376	4646633	4768213	2860550	2695004	2600717	1549237	1724721	1773540	2799073	5052795	4735404	2146108	2442515	2579016	844102	846371	1	30300000	29800000	29800000	10200000	11300000	11800000	(300.69846, 147010.05)(302.00894, 32516.092)(302.80838, 9638.322)(282.92316, 1948.9192)(284.07886, 3376.34)(301.09225, 52888.12)(302.09116, 14064.437)(303.10028, 6158.01)(283.54602, 7232.7754)(284.08463, 1127.9)(323.35403, 34886.438)(324.07666, 15738.295)(325.07214, 17272.307)(326.07532, 1494.2467)(305.602, 26178.104)(306.06897, 4631.877)(307.0724, 1478.2032)	5.39833
Protocatechuic acid 4-O-glucoside	Phenolic acids	Hydroxybenzoic acids	376839	926205	337245	1019593	999962	983374	1112404	243863	254439	1074604	1024528	963790	3098313	3146600	3283352	875312	850228	787765	900839	994723	1046557	1830127	1702254	1554637	970605	1064789	1108619	1162956	391717	805728	328043	286613	256605	1091233	1208326	1266552	(316.67902, 13480.952)(317.48038, 2596.8005)(300.57428, 3417.625)(318.5389, 8642.83)(318.0997, 1070.475)(301.81015, 11083.395)(301.08356, 6987.45)(301.08353, 870.7933)(341.07684, 17370.842)(342.086, 3775.075)(344.0747, 114.46)(321.16254, 13141.891)(322.0569, 1980.609)(323.0565, 226.56)	4.71028
Gallic acid 3-O-gallate	Phenolic acids	Hydroxybenzoic acids	1	1	1	1	1	1	1	1	1	1	1	1	1	1	1	1	1	1	167386	170207	187669	1	1	1	1	1	1	1	1	1	1	1	1	1	1	1	(323.04065, 9457.06)(305.0298, 1336.5533)	13.0186
5-O-Galloylquinic acid	Phenolic acids	Hydroxybenzoic acids	324230	292307	282111	1	1	1	1	1	1	1	1	141434	4394142	4756151	4883815	1911414	1780731	1843426	189200	224469	225643	155079	1	1	144654	136748	134998	1	1	1	68400000	69000000	67400000	2273537	2504466	2581017	(346.08432, 2514.899)(345.88672, 5794.7686)(327.07047, 226652.39)(328.07404, 36318.54)(329.0765, 15852.938)(330.07642, 2129.5764)(370.35605, 3826.8757)(372.0806, 140.83)(349.35532, 8486.861)(350.05734, 992.88995)	2.62084
Galloyl glucose	Phenolic acids	Hydroxybenzoic acids	2074511	1922123	1908415	17200000	16000000	15600000	1	858001	941043	7766476	8069428	7948241	1	1	1	614210	1204419	1452558	7867672	8365634	8652813	19300000	17900000	16400000	1300748	1440213	1510863	494119	485397	496817	893739	877728	864694	1	478616	503514	(355.06537, 61717.504)(356.0685, 8753.5625)(357.07043, 1279.7125)(315.0727, 90991.51)(316.07666, 14695.771)(317.078, 2911.54)(333.84293, 2142.452)(335.08136, 2155.4026)(337.09262, 5931.3066)(337.69806, 8698.377)	4.00061
Ellagic acid arabinoside	Phenolic acids	Hydroxybenzoic acids	396107	363051	360553	189020	174658	167995	150789	165994	147836	185165	189939	171508	87708	193066	195228	312477	295428	291901	158983	166000	175213	160380	153177	147212	1	89127	97472	87606	80444	86186	141387	140522	140235	528786	577273	611661	(416.32474, 7034.314)(417.0351, 1836.07)(417.841, 3946.2563)(418.03552, 1265.5468)(439.0379, 16129.913)(440.04196, 1782.6733)	18.7755
Ellagic acid glucoside	Phenolic acids	Hydroxybenzoic acids	196323	175467	170065	1	1	1	1	1	1	1	1	1	1	1	1	1	1	1	202073	212871	222192	72477	1	1	1	1	1	76072	82604	82771	1	1	1	1	1	1	(447.06094, 11855.25)(448.31284, 1647.84)(449.05942, 6055.5063)(447.06168, 10049.755)(448.0644, 815.37)(491.55493, 998.915)	1.588
Cinnamic acid	Phenolic acids	Hydroxycinnamic acids	2281411	2961767	1174726	1	98863	98517	2968753	1581103	1	334514	354044	288279	4946283	5013832	5027484	1	1	1	1608358	2516082	1668573	1	230204	199893	325283	361433	370345	3924611	3845955	3901829	2943010	249245	2827121	744274	860324	927064	(150.58408, 6756.598)(152.06146, 8667.05)(153.0675, 415.88)(132.04729, 3482.3574)(132.046, 814.45)(149.06071, 27322.537)(150.06013, 4880.4136)(131.84598, 27019.898)(132.85626, 17592.52)(173.96431, 4075.0417)(174.71819, 1795.0)(175.05676, 3854.935)(155.10863, 10232.03)(157.04092, 887.7217)	2.91537
p-Coumaric acid	Phenolic acids	Hydroxycinnamic acids	2121385	1997529	1711518	3701235	3591814	3531291	2152787	2235244	4365721	540315	429572	392100	4841190	4026552	5244979	520145	507526	495458	3836191	4734394	4532073	8024801	7297438	6861907	1	1	998563	4851627	4256710	4908662	5941469	5777985	5659528	1	435098	482040	(164.0489, 651.76)(165.05574, 38378.168)(166.05887, 4079.3508)(147.04485, 81489.53)(148.0486, 9163.847)(149.05748, 510.71002)(188.03845, 749.34393)(171.02997, 8636.243)	6.30165
Caffeic acid	Phenolic acids	Hydroxycinnamic acids	2654383	2959732	2641984	1421463	1102444	1048762	414807	398217	421082	1	496786	506276	628560	665456	708095	885866	841591	783521	1558910	1544694	1880401	1086486	1046397	1000304	528884	250627	270492	1603931	2123621	2160656	2455027	2501555	2388335	602763	684052	1544924	(181.04568, 10208.622)(181.84506, 1467.898)(165.0345, 4485.625)(181.05093, 5863.09)(182.0564, 1465.2051)(163.04022, 20840.719)(164.04453, 2169.8765)(165.05724, 365.74332)(206.0353, 13806.171)(187.02568, 1366.29)	6.30146
p-Coumaric acid ethyl ester	Phenolic acids	Hydroxycinnamic acids	1856602	1787062	1762492	240579	110883	161530	7120871	371371	374842	1474747	1449307	1434115	625089	630789	643659	234977	224338	211896	2263965	2363698	1740710	127744	276383	261420	224541	1	152227	1240636	937426	930796	801516	450295	431712	1	1	1	(193.18643, 7323.974)(194.08342, 3114.9617)(174.31783, 914.5675)(193.13248, 23712.041)(194.0874, 3441.5542)(175.0765, 29117.436)(176.07968, 4875.0127)(218.01022, 5593.9326)(198.97076, 2839.1345)(200.56705, 8988.875)(200.0649, 297.59)	6.26262
Isoferulic acid/Ferulic acid	Phenolic acids	Hydroxycinnamic acids	1602400	1667923	1546036	983150	936178	872565	2520281	2055795	1940639	1145499	1073744	1046387	1	1	1053590	1417690	1368864	1304851	1631651	1	1747384	1537982	2381764	1482689	1425949	1544175	1631601	445469	1	1388991	2133797	2029741	2020837	1631206	1752369	1787841	(196.60777, 4651.143)(197.06183, 1516.328)(178.05191, 10152.755)(195.06729, 4899.7314)(196.0627, 1600.73)(177.05583, 48479.777)(178.05911, 3974.7957)(179.0712, 134.4)(219.0518, 492.82)	9.9758
Hydroxycaffeic acid	Phenolic acids	Hydroxycinnamic acids	3058759	2919231	2862666	450684	1	1	1096853	1141072	1120313	1017880	989163	880493	1007193	1125114	621672	8871113	8542279	8120683	753330	784774	835003	991017	855872	777038	235790	267982	285352	982334	1005640	1013184	4115947	3938913	3956218	1835823	1999381	2076215	(198.29134, 3518.54)(179.03317, 2567.5798)(198.29799, 27999.658)(200.05202, 8498.035)(179.87036, 68376.016)(180.03857, 8640.101)(181.04114, 2111.02)(219.66136, 35789.56)(220.03171, 2297.3545)(201.0214, 387.56)	3.71888
p-Coumaroyl glycolic acid	Phenolic acids	Hydroxycinnamic acids	150860	140685	141897	1254625	336713	249075	456456	300974	713660	713720	705391	653845	388160	583287	421856	599246	549809	551798	242621	580255	473399	961320	241047	879135	595018	551554	577455	373657	488864	400988	634880	630317	420099	682476	1560200	1611988	(222.04884, 8932.622)(206.04643, 53088.46)(223.33835, 16313.9375)(224.0656, 2092.7258)(225.06004, 644.08)(205.05168, 7671.59)(206.05244, 1880.825)	17.5908
Sinapic acid	Phenolic acids	Hydroxycinnamic acids	1601530	1493774	1498664	801692	734084	701038	4374033	4388395	4475897	690442	255803	231716	2269780	2432436	2592287	164070	1	159662	515609	510839	570012	367088	335748	324486	476159	513762	538526	4685361	4733125	1	2758937	2699590	2661240	1	158963	165530	(224.57146, 10240.819)(225.0599, 5513.63)(206.0529, 23190.467)(207.0649, 569.32666)(225.64993, 19437.68)(227.17438, 3263.0781)(229.08684, 337.5)(207.06642, 44907.832)(208.07051, 5230.817)(247.81032, 6875.537)(249.06091, 1348.0149)	10.5787
p-Coumaroyl malic acid	Phenolic acids	Hydroxycinnamic acids	3195898	2907044	2873357	5705978	5310712	5099378	42600000	42700000	7240564	8141242	7811432	7814419	1644274	1692657	1700200	1062936	1044605	958185	7672217	6571510	4199157	1842820	1862385	1780308	7563656	8280035	8505595	2851566	4006744	2964417	2094674	2047829	2018191	1	804499	864758	(284.35138, 12214.108)(285.06882, 252.91667)(263.0558, 4482.7666)(281.06653, 51657.598)(282.06982, 6559.58)(283.0759, 257.03)(264.56213, 5274.2563)(303.05075, 246437.52)(304.05435, 49113.996)(305.05734, 8518.25)(306.0594, 2032.9199)(286.84613, 6240.464)	7.44245
Caffeoyl aspartic acid	Phenolic acids	Hydroxycinnamic acids	241670	230866	215714	1	1	1	116839	526635	519181	162865	1	1	1	1	1	323721	324457	291773	467258	492331	501516	1	1	1	1	1	1	617563	626495	633462	217190	221548	218696	1	1	1	(296.06793, 503.19)(281.06616, 3617.3066)(299.08386, 1646.124)(322.07114, 1464.9166)(302.10352, 67436.58)(303.49176, 11369.835)(305.05856, 3108.5076)	5.6831
p-Coumaroyl tartaric acid	Phenolic acids	Hydroxycinnamic acids	4976518	4738838	4697669	17700000	16500000	15900000	46500000	25600000	2348841	52100000	8656375	3489565	22300000	22200000	1194228	1	27200000	25700000	5228579	5001083	5677562	355079	3085334	2944991	2344802	2606813	1	6254109	6255452	1537791	1382981	1355835	1373385	1	1	1	(297.062, 4768.955)(298.06485, 908.60004)(281.7236, 5190.3184)(301.0748, 1184.3)(319.04602, 396778.06)(320.04916, 63266.633)(321.05185, 10017.3125)(322.0538, 1518.9257)(302.0438, 291.54)	7.41667
Avenanthramide 2p	Phenolic acids	Hydroxycinnamic acids	4513722	4363988	4309791	838362	795935	780713	449777	476578	470541	1231668	1178276	1153269	4364496	4499452	4571837	2602923	2509075	2343574	5620953	5928850	6153139	258724	1	1	1128210	1257663	1292771	4684738	5340822	5344429	1179111	1160085	1134653	1	1	1	(299.0775, 66898.336)(300.08093, 8383.524)(301.08353, 1460.52)(281.43307, 30185.256)(282.06982, 6327.2886)(283.0759, 244.79)(283.0834, 1615.4434)(284.0798, 264.35)(323.07755, 2107.5935)(304.27133, 100522.25)(305.1789, 16889.973)(306.31268, 1796.8131)	8.42316
Cinnamoyl glucose	Phenolic acids	Hydroxycinnamic acids	3545054	3236480	416137	417087	364550	6305021	728178	631224	1	1582921	2329876	295740	2415755	2495434	2581322	1202274	1149838	745317	5200264	5985420	1	11000000	10200000	9314490	978375	1082738	1131606	1060850	1058125	1069860	245233	202617	211057	297445	627635	632889	(311.65466, 2308.749)(314.3683, 1100.2401)(315.12302, 2484.47)(294.25443, 3860.1716)(295.10315, 2711.1633)(312.24567, 5448.424)(316.1193, 3251.8)(294.8448, 6905.89)(295.1083, 1021.81995)(296.6062, 2786.9548)(334.41992, 6345.303)(334.10275, 4518.578)(318.09103, 9724.15)(317.58597, 1814.0317)(318.09167, 3060.68)	4.00603
Sinapine	Phenolic acids	Hydroxycinnamic acids	25900000	25200000	24800000	9744328	8673525	8466592	9572410	9617370	9473147	6116110	5933185	5917167	4650665	4847836	5030472	3175935	3096826	2964638	11000000	11500000	11900000	13800000	13100000	12500000	2148723	2366312	2487104	4787282	1573388	4985345	4352034	4157876	4118267	4862695	5295438	5470062	(314.42975, 796.4513)(294.1646, 2896.5007)(314.17892, 1086.1267)(296.07892, 4668.48)(298.17346, 1716.4867)(335.16055, 2112.385)(315.14337, 368699.56)(316.35867, 36434.004)(317.14853, 4304.657)	9.471
Caffeoyl tartaric acid	Phenolic acids	Hydroxycinnamic acids	1	1	1	74637	70557	1	242584	252826	258944	71245	70668	71220	1	124597	1	1	1	1	72381	1	76173	1	1	1	79535	90816	94737	622436	588070	630089	289763	282592	280742	1	1	1	(315.0578, 823.385)(317.074, 955.5833)(297.60468, 22751.312)(299.13992, 76376.766)(299.79852, 50871.906)(335.0376, 10894.89)(336.03842, 950.715)(317.02197, 9633.603)(318.02264, 2041.5973)	2.2778
Avenanthramide 2c	Phenolic acids	Hydroxycinnamic acids	7128021	1520106	1519041	7558069	7393888	7254618	4965150	5056452	5159167	7121203	6860780	6747837	5469520	5579450	5770961	4576699	5513196	5281592	6075783	7248681	7577785	12700000	11900000	10900000	6422535	7096848	7272575	7825712	6006602	7906441	474509	468382	458257	336765	998212	1038462	(315.18414, 71749.664)(316.19614, 10787.22)(317.0772, 2782.051)(297.68533, 9378.686)(298.31424, 2231.1624)(316.0801, 26359.36)(317.08975, 3673.0732)(302.28595, 851.154)(341.07834, 19510.771)(320.6599, 91072.87)(321.05215, 22746.635)(322.05444, 1490.695)(323.0565, 226.56)	4.46683
Feruloyl tartaric acid	Phenolic acids	Hydroxycinnamic acids	151182	1	1	1	1	1	1	1	1	1	1	1	5840455	6229622	6436119	2243430	2117265	2159492	299856	368904	359788	1	1	1	100465	112084	112672	1	1	1	5239039	5119572	5239207	2210367	2395313	2470741	(327.06952, 101305.664)(328.0726, 13310.529)(329.07373, 6836.0835)(309.0632, 753.89)(327.07208, 38055.6)(328.0757, 6896.028)(329.07843, 870.7834)(309.06152, 15279.1045)(310.06506, 1486.204)(349.05508, 8942.434)(350.05734, 939.2266)	2.72685
p-Coumaroyl tyrosine	Phenolic acids	Hydroxycinnamic acids	452796	417526	300571	378045	345928	311663	240226	314260	308428	398095	400123	375372	1	1	1	628710	579081	561464	1	744622	545357	598466	563585	560400	1	409657	429715	365459	340297	366532	698146	650042	638968	1808041	2290394	2421675	(328.28003, 1596.2734)(330.61404, 1973.565)(309.6657, 12763.182)(310.09903, 1292.68)(328.7864, 6595.0005)(329.52072, 1059.448)(312.86563, 1553.8363)(315.1235, 2633.9202)(351.34106, 8842.01)(352.11026, 3042.6934)(334.69495, 982.20105)(335.30048, 3385.83)	6.57674
p-Coumaric acid 4-O-glucoside	Phenolic acids	Hydroxycinnamic acids	2275494	2167637	2177220	3840756	3532103	3379275	2038322	2034556	2051928	5779778	5532780	5395230	1079775	1103952	1126193	1810063	1703913	1654022	2892764	3106777	3204399	389007	368280	351450	2815221	3162044	3279021	818664	802223	1243395	2118432	2079056	2029524	1277450	1442882	1503488	(330.2465, 26207.33)(331.10397, 21040.13)(308.57184, 36887.195)(309.0899, 6843.395)(310.09134, 243.28333)(330.74298, 2415.4326)(310.6074, 6737.311)(310.10544, 579.8933)(349.09097, 35047.645)(350.09558, 6223.8413)(351.09985, 1018.87665)(332.15765, 7095.6772)(332.08508, 2538.1267)	5.63217
Avenanthramide 2f	Phenolic acids	Hydroxycinnamic acids	242415	232540	224652	168598	1	1	405784	418722	420988	1	526256	1	139372	140053	146590	398724	393397	366672	1	1	1	194441	168164	1	221611	245890	260665	326296	324511	323588	336977	224396	321084	198743	224620	221745	(330.52444, 5745.923)(332.1025, 252.04)(312.16342, 3990.4043)(331.76648, 7405.229)(332.11002, 4240.6704)(333.1104, 5751.97)(313.7582, 18888.225)(315.09692, 4909.749)(316.09213, 1696.3002)(353.68872, 5639.923)(354.33704, 5256.615)(355.0952, 383.875)(334.1281, 13791.801)(335.06784, 1908.1835)	5.16478
4-p-Coumaroylquinic acid	Phenolic acids	Hydroxycinnamic acids	1793972	1	1682606	1464834	1358490	1227124	337714	433172	2127917	1	1	1	184276	192270	158495	742059	690560	685368	5530594	5863303	6093911	4557086	4183807	4098727	404068	441291	146008	376293	376518	370892	1024666	977332	976899	222248	259018	264886	(339.05682, 10936.821)(340.10855, 2745.1714)(321.17526, 1951.6884)(323.0901, 111.04)(339.17084, 81856.4)(340.26642, 16591.281)(341.11832, 2082.8215)(323.7323, 4346.4927)(324.60284, 643.825)(324.1127, 24166.14)(325.1002, 2587.77)(363.25195, 72348.97)(364.70435, 23477.088)(366.11014, 7636.6426)(343.88422, 2317.6128)	4.36797
Caffeic acid 4-O-glucoside	Phenolic acids	Hydroxycinnamic acids	2739043	2615546	2620855	14100000	12700000	12300000	104297	107283	102131	322534	303620	294337	357808	584440	608195	1	1	1	1562042	1684564	1696536	7051037	6294407	6050228	1103538	1218842	1308592	800090	798848	789339	410944	410564	403111	469192	496586	506803	(342.69043, 5165.4854)(345.3453, 2195.4963)(325.67014, 12191.707)(326.48514, 10990.422)(327.68607, 5496.9214)(329.0901, 7910.82)(345.23456, 7532.4927)(345.09912, 922.55505)(325.09088, 104858.7)(326.0949, 14039.553)(327.09378, 4889.197)(368.90045, 1042.262)(348.4159, 6796.7026)(348.08105, 615.3433)	3.50239
4-Caffeoylquinic acid	Phenolic acids	Hydroxycinnamic acids	3794926	3583408	3570422	13300000	12500000	12200000	2680523	2652507	2662908	2973241	2896512	2801162	1726026	1805591	1858890	1664334	1591533	1542228	1650700	1778964	1818590	2415846	2127071	2065212	1465875	1	1689671	791634	750414	719955	1111477	1076915	1036606	804777	907012	941433	(354.67404, 48741.098)(356.106, 12703.547)(357.10596, 2537.47)(337.21082, 2710.1348)(339.58908, 965.11334)(355.10132, 34306.957)(356.10587, 4925.7217)(357.10532, 854.4925)(338.30072, 11989.738)(338.09607, 1366.35)(378.08868, 2168.38)(361.74945, 1523.8533)	3.86769
Ferulic acid 4-O-glucoside	Phenolic acids	Hydroxycinnamic acids	1	1	1	1	1	1	1	1	1	1	1	1	317478	354551	371566	1	1	1	5894224	6218866	6406832	4834704	4428140	4344304	1	235373	1	667670	663571	674535	1	1	1	213730	255358	265913	(356.10757, 10200.735)(357.10977, 823.0651)(338.09784, 1690.4811)(339.10916, 88028.54)(340.1114, 28062.025)(341.11377, 3300.4968)(384.1022, 2732.9321)(361.09018, 40229.18)(362.09363, 6242.615)	5.731
Feruloyl glucose	Phenolic acids	Hydroxycinnamic acids	2112470	1943691	1975161	3627285	2284026	3216105	2329231	2289195	1567088	436926	432764	420377	317478	354551	371566	866986	802064	685368	5894224	6218866	6406832	4834704	4428140	4344304	405145	235373	470091	667670	663571	674535	1091410	1049481	1042573	213730	255358	265913	(356.20514, 10865.221)(357.38278, 3336.3735)(360.12833, 2590.4465)(338.2767, 6901.0166)(339.50665, 2135.982)(357.1182, 3424.843)(339.1084, 60170.684)(340.11145, 12952.925)(341.1195, 1321.4712)(383.0384, 1989.7979)(362.69678, 66395.516)(364.45657, 22023.316)(366.10986, 6113.905)	4.82358
Rosmarinic acid	Phenolic acids	Hydroxycinnamic acids	567238	527438	528558	391807	358911	140404	142112	230201	384155	610082	502899	486366	171002	1	179244	693180	654617	620811	1172355	1256143	1308097	727808	674315	666773	432044	488720	503800	1	1	1	554841	548051	538385	1836038	1968618	2101291	(361.09018, 44463.824)(362.09363, 6768.668)(345.17313, 1817.2655)(346.7995, 645.8)(365.10626, 934670.0)(366.1096, 123042.8)(343.2902, 813.78204)(383.23502, 35134.734)(384.0839, 4826.7437)(385.08752, 1357.8883)	2.319
4-Feruloylquinic acid	Phenolic acids	Hydroxycinnamic acids	2214220	1428711	1443674	1447376	1338235	1265322	288443	310969	156413	237333	237509	223687	775882	935945	955966	678881	626617	631690	1034282	1156037	279063	714136	672234	664479	198706	448220	1	1432209	1382014	328266	584652	557563	543383	538019	602090	656322	(369.61612, 9858.353)(371.92047, 5392.25)(371.12555, 362.495)(373.11465, 36252.227)(351.3186, 7747.702)(352.43863, 15550.734)(369.1177, 13293.835)(370.12146, 2508.1233)(371.1227, 323.47)(352.4749, 8905.36)(352.53888, 2131.6914)(391.33197, 7128.506)(392.60513, 2007.0634)(395.1132, 103.76)(375.3873, 7514.64)(374.1004, 4317.0923)(375.0978, 629.51666)	6.27722
8-O-4'-Dehydrodiferulic acid	Phenolic acids	Hydroxycinnamic acids	111623	103112	100041	1	1	1	232601	284667	293211	1	1	1	1	1	1	1	1	1	96429	124661	138712	70139	1	1	1	1	1	194460	225426	204780	1	1	1	1	1	1	(386.77393, 3515.529)(388.64307, 42082.19)(389.88464, 6922.319)(409.8964, 3344.7173)(410.08823, 432.19333)(393.5935, 3242.9001)	2.55781
5-8'-Benzofuran dehydrodiferulic acid	Phenolic acids	Hydroxycinnamic acids	1	1	1	1	1	1	232601	284667	293211	1	1	1	1	1	1	1	1	1	96429	124661	138712	70139	1	1	1	1	1	194460	225426	204780	1	1	1	1	1	1	(386.77393, 3515.529)(389.1031, 52766.8)(390.10547, 7745.0874)(409.8964, 3344.7173)(410.08823, 432.19333)(393.08862, 619.60004)	2.024
3-Sinapoylquinic acid	Phenolic acids	Hydroxycinnamic acids	2824790	2631392	2618830	1	1	1	142453	146230	141703	1	1	1	327334	347798	367140	467418	1	1	2063357	2191644	2273742	977743	856829	795029	232164	259967	275285	690663	682185	678010	208797	192282	193677	1	1	313672	(399.13086, 12674.192)(380.89563, 10998.967)(381.6218, 1649.7)(399.79626, 24290.354)(400.70355, 6932.8403)(401.1436, 1587.5817)(381.11734, 6399.6133)(422.12402, 2517.6301)(405.1024, 332.79834)(407.11478, 121.909996)	3.71459
Chicoric acid	Phenolic acids	Hydroxycinnamic acids	1	1	1	340952	287549	266431	1	70178	70117	1	1	1	1	77379	72932	1072805	993741	990146	1	89705	116371	425969	364992	356292	1	1	292031	114532	118486	111944	1684129	316425	1621915	1	184681	214607	(479.08075, 2472.925)(456.87494, 7779.414)(458.08102, 169.27)(461.0906, 419.42)(479.5981, 2023.036)(457.0765, 8718.494)(458.08023, 1094.6317)(497.36642, 1796.7429)(498.7511, 597.06665)(479.7408, 3047.6963)(480.07428, 1308.7051)	5.02284
4,5-Dicaffeoylquinic acid	Phenolic acids	Hydroxycinnamic acids	140591	319024	316845	180907	1770249	1704387	691335	714982	724029	1946040	1932009	1902865	990048	993845	996471	3195111	3108413	3096081	687989	732166	1	176828	158359	146996	155180	165757	503320	838176	795139	825166	120300	113533	115602	278866	305494	329253	(516.586, 5432.7573)(517.1176, 4091.1)(518.1284, 500.87)(499.1166, 644.12)(503.1341, 3142.46)(518.1254, 5307.9067)(501.80237, 15864.524)(502.54004, 3579.8918)(542.69495, 5566.7124)(521.46643, 26152.078)(522.3924, 12178.791)(525.1127, 576.22)	13.3276
3,5-Dicaffeoylquinic acid	Phenolic acids	Hydroxycinnamic acids	1	319024	316845	1	1770249	1704387	691335	714982	724029	1946040	1932009	1902865	990048	993845	996471	3195111	3108413	3096081	687989	732166	1	176828	158359	146996	155180	165757	503320	838176	795139	825166	120300	113533	115602	278866	305494	329253	(516.62396, 5676.545)(517.1176, 4091.1)(518.1284, 500.87)(499.1166, 644.12)(503.1341, 3142.46)(518.1254, 5307.9067)(501.99344, 18319.234)(502.54004, 3579.8918)(542.79224, 6383.822)(521.39166, 27276.023)(522.3924, 12178.791)(525.1127, 576.22)	13.1294
3,5-Diferuloylquinic acid	Phenolic acids	Hydroxycinnamic acids	645823	576729	439683	286238	267297	244581	98992	232830	1	210422	198141	203506	381614	445236	439286	905189	855884	838428	226652	244337	1	190275	644029	618838	222686	1312304	1381449	91091	90511	84495	92617	1075285	1046199	236473	276983	292524	(527.85223, 10489.502)(528.91785, 1946.9954)(548.1629, 133383.11)(549.1655, 24978.309)(550.16364, 11747.491)(551.1657, 2949.692)(527.3384, 13037.5625)(528.4914, 3157.9453)(529.1564, 284.74)(572.0546, 13353.806)(573.16156, 3465.6292)(552.14215, 3393.12)(553.1437, 430.99)	3.3455
3,4-Diferuloylquinic acid	Phenolic acids	Hydroxycinnamic acids	1	1	1	286238	267297	244581	1	1	1	1	1	1	1	1	439286	905189	855884	838428	1	1	457237	1	644029	618838	222686	1	1	91091	90511	84495	92617	1075285	1046199	236473	276983	292524	(528.07965, 13274.218)(529.0823, 1969.4587)(548.1626, 56824.094)(549.16516, 10797.599)(550.163, 4705.93)(527.8199, 17147.0)(529.15405, 5948.85)(571.87494, 8123.4985)(573.1616, 4150.27)	4.75278
24-Methylcholesterol ferulate	Phenolic acids	Hydroxycinnamic acids	1	1	333140	1	1	1	183739	328365	341722	1	1	1	1	1	1	414985	340982	254056	1	1	1	1	1	1	1	362291	414660	198487	783989	836168	1	1	1	532986	666873	814087	(576.7069, 1851.1259)(577.42145, 443.02197)(578.4123, 368.365)(562.7504, 3747.4563)(563.422, 5131.44)(578.4184, 1522.68)(560.6601, 5178.1504)(562.0896, 3159.1711)(562.7147, 2145.3442)(563.42126, 3850.4402)(600.7571, 4410.483)(601.42566, 1044.695)(585.5294, 2355.9722)(585.4193, 1697.65)	20.519
24-Methyllathosterol ferulate	Phenolic acids	Hydroxycinnamic acids	398291	279957	333140	1361794	1180681	1091037	183739	328365	341722	153903	154284	1	465497	484825	500569	414985	340982	254056	1	1	1	981945	483042	769866	167772	362291	414660	198487	783989	836168	699772	444928	426091	532986	666873	814087	(577.6459, 2008.8351)(577.92145, 563.85834)(578.4123, 368.365)(561.4131, 3692.6545)(561.4181, 4443.542)(561.4263, 3925.185)(580.6814, 2066.225)(560.5722, 5053.4106)(562.0896, 3159.1711)(562.7147, 2145.3442)(563.42126, 3850.4402)(601.41705, 2987.9426)(600.92065, 1072.13)(601.4167, 143.73)(584.0217, 9255.84)(583.65436, 5479.258)(584.404, 1278.0967)	19.7922
24-Methylcholestanol ferulate	Phenolic acids	Hydroxycinnamic acids	1103345	2108421	2125683	4575344	4283171	4135547	265533	282794	287576	164777	159711	138275	767368	780171	914955	1	1	1	154938	203496	173242	1236161	1130953	1095123	104409	119205	147406	839368	859008	900960	2052463	1968519	1949466	359010	432614	411202	(579.3114, 26871.521)(580.5279, 14635.077)(582.4294, 8835.657)(561.1399, 6927.6616)(561.60205, 2532.3005)(562.4326, 1293.754)(579.9333, 3059.54)(582.4523, 834.17)(562.5497, 2308.939)(564.1099, 1215.5634)(567.46313, 457.59998)(605.44226, 3571.4346)(606.1077, 2405.72)(585.33887, 4472.531)(585.1709, 790.50507)	21.8896
Stigmastanol ferulate	Phenolic acids	Hydroxycinnamic acids	711282	572935	529999	155801	124655	1624648	1848459	202122	200571	2758666	2739148	2668848	289829	94319	118100	2241019	1963708	1907982	107738	1595565	1680951	492514	456384	449735	3637226	4027667	4373657	164032	162707	150635	2186449	2150189	112289	6955214	7937132	8490375	(593.14417, 6646.8604)(594.7949, 3690.4453)(595.9701, 726.27997)(574.43097, 3033.5017)(575.4336, 368.18)(576.4224, 206.26)(594.44934, 31458.576)(595.55896, 11558.102)(595.97107, 2877.6821)(577.85516, 2128.644)(580.4543, 836.30664)(617.6026, 3517.975)(618.567, 3356.218)(620.3394, 1814.4612)(621.1242, 6417.8867)(621.461, 7953.23)(599.46606, 3927.2795)(600.43365, 1979.1351)(599.93134, 426.76)	21.7014
Sitosterol ferulate	Phenolic acids	Hydroxycinnamic acids	778465	709445	698922	18300000	17100000	16200000	344297	380926	363272	478021	467094	467182	123302	1	182258	208760	184842	178333	272363	336486	365024	1586994	1394667	1351085	577815	639292	712614	462801	503797	504941	438189	439114	430885	1441532	1653946	1772598	(593.44415, 44102.137)(594.46, 17362.182)(572.55536, 8594.319)(573.4352, 1056.8444)(593.3088, 28801.55)(594.31006, 13946.233)(595.1896, 4478.87)(595.4604, 1880.34)(574.4252, 5713.353)(575.5996, 941.59576)(576.4234, 952.9766)(617.3036, 4965.3457)(617.7024, 3019.4492)(618.1003, 160.79668)(596.24976, 45610.137)(598.6856, 13224.994)(598.7568, 6128.5923)(599.4252, 4584.975)(600.6338, 4586.132)(601.426…	20.555
2-S-Glutathionyl caftaric acid	Phenolic acids	Hydroxycinnamic acids	7415223	6899511	6698986	402715	349464	321339	1492006	1545923	1522168	216276	189442	193792	2565295	2671356	2688903	1962232	1879406	1770524	6281088	6717619	7109413	326645	310811	284796	176504	196084	218141	851667	854535	843282	892034	860629	849951	328053	375251	386685	(617.1168, 74161.86)(618.11914, 21353.553)(619.1208, 7425.2812)(620.1239, 2249.755)(603.0988, 2885.1667)(604.1024, 225.43001)(640.1024, 2037.4249)	10.0051
Verbascoside	Phenolic acids	Hydroxycinnamic acids	1403220	1309526	1272978	1337928	1233148	1018373	363058	377276	353332	815188	807715	763255	347591	345744	356723	1429637	1406092	1356224	902438	1007856	1069947	427285	398266	363766	323548	360987	393439	281199	302457	315235	439490	405578	412617	879964	1019144	1027680	(626.2161, 20640.668)(627.2168, 11400.83)(628.21497, 7931.9023)(629.21497, 2161.7954)(630.2128, 778.5267)(626.21674, 36689.41)(627.21735, 20964.717)(628.21533, 15183.289)(629.2149, 6042.4253)(630.2133, 1620.9875)(607.21674, 41363.516)(608.21985, 12922.799)(609.2258, 3154.9456)(630.50946, 1122.9834)	20.8743
1,2-Diferuloylgentiobiose	Phenolic acids	Hydroxycinnamic acids	148617	130660	134369	865642	790348	750613	727870	735192	740491	1732497	1654555	1598312	880372	871522	895913	1652322	98960	93492	148587	157366	178879	147412	135767	133604	648503	712525	758598	433325	447329	442409	245072	227745	216210	417810	472389	1	(677.2088, 3263.0833)(717.20087, 9668.36)(718.2046, 2167.8967)(700.0105, 24866.014)(701.0116, 14901.509)(702.19867, 13567.953)(703.1985, 5844.687)(704.19666, 2039.1436)(705.18634, 1061.88)	20.5939
1-Sinapoyl-2-feruloylgentiobiose	Phenolic acids	Hydroxycinnamic acids	1	1	1	130960	127827	116052	286121	289957	1	165391	1454515	1416704	1	357563	1	205733	1	193170	358780	313971	390952	1	1	1	1	1	1	1	1	1	1	601582	498403	1	1	923503	(728.2303, 10083.285)(729.23145, 6142.7515)(730.2297, 4361.8467)(708.21844, 17295.26)(707.20337, 818.3625)(747.20624, 11783.4795)(748.20465, 4918.687)(749.20294, 789.21136)(730.191, 3086.2117)(731.1919, 2785.665)(732.18994, 2228.48)(733.1907, 1477.57)	25.8853
1,2-Disinapoylgentiobiose	Phenolic acids	Hydroxycinnamic acids	1520995	1352511	1355714	196588	7973883	7642726	3567805	3600809	3619330	703186	675417	651965	3241484	244608	3289191	982211	943367	930752	3098075	3277362	3457291	5448770	5115395	4814166	3786036	244621	4466048	3951129	4076898	4120275	319895	307928	303386	7816039	8581766	8986622	(777.4127, 63791.53)(778.7176, 2125.5342)(779.2083, 1130.7399)(761.3784, 7455.877)(762.4131, 5014.451)(763.3627, 4117.4736)(763.8757, 3086.1167)(764.2017, 4657.81)	24.7253
1,2,2'-Triferuloylgentiobiose	Phenolic acids	Hydroxycinnamic acids	1	1	1	4301647	3704007	3509403	1247412	1222230	1127088	4085103	3921233	3923294	1	535846	571808	5826869	5689911	5487170	1128879	1124446	1190075	1117594	1195506	1174845	1	1	1	1	761075	741384	1337122	1287620	1296486	2256704	2578732	2717981	(893.24713, 63352.82)(878.23, 2363.844)(879.23083, 2452.7515)(880.22906, 2398.0715)(881.2288, 1328.6143)	28.162
1-Sinapoyl-2,2'-diferuloylgentiobiose	Phenolic acids	Hydroxycinnamic acids	1	1	1	1601227	851949	803563	946295	953793	920932	1586560	1548314	1508333	738184	734749	761573	1	1500266	1411191	1	1	1	488754	481912	476951	555046	600315	651286	442362	433564	424833	729734	734238	720830	1317933	1479862	1521718	(923.6075, 18010.887)(926.78674, 4247.8325)(927.28094, 2124.445)(908.24347, 1638.7401)(909.24384, 1289.4342)(910.2425, 1142.7292)(911.2443, 695.936)	27.79
2,5-di-S-Glutathionyl caftaric acid	Phenolic acids	Hydroxycinnamic acids	1	1	1	1	1	1	1	1	1	183837	170787	160640	258893	267695	287346	113727	106774	98693	1	1	1	102921	1	1	1	1	1	1	1	1	1	1	1	1	1	1	(923.751, 8198.7705)(924.7536, 3322.5957)(929.1899, 2760.625)(927.1909, 4178.97)(928.1918, 3294.24)(929.1898, 3267.99)	6.8605
1,2'-Disinapoyl-2-feruloylgentiobiose	Phenolic acids	Hydroxycinnamic acids	1	1	1	963525	892753	852104	388247	411176	396836	1101026	1100720	2106867	175873	159458	164982	1793444	1781804	1765073	241220	249231	287691	554158	524561	486642	283652	316752	353116	346902	352699	344750	443077	419187	427675	828451	950112	958759	(931.0597, 2245.5647)(931.2362, 1025.5267)(912.2534, 16795.572)(913.252, 7335.3105)(914.2506, 1272.1436)(953.2503, 9337.61)	25.4828
1,2,2'-Trisinapoylgentiobiose	Phenolic acids	Hydroxycinnamic acids	1392982	1296801	1240629	395710	22100000	309068	8809666	8567665	8397332	23000000	23300000	22700000	2776222	2798292	2773368	28300000	27300000	27500000	6821515	6974976	7320974	8283207	8812142	8698201	3110160	3355857	3603242	4717179	4527816	4359239	7179315	7127663	7129527	14200000	16400000	17300000	(983.2819, 201983.19)(984.2801, 116211.13)(985.27826, 14926.367)(965.8044, 4408.5)(967.5529, 6900.4424)(968.4192, 6911.0635)(969.2637, 5266.2324)(970.26227, 3205.9653)(971.26135, 1385.3679)(972.2594, 263.62)	28.9331
Methoxyphenylacetic acid	Phenolic acids	Hydroxyphenylacetic acids	1	1	1	1	1	1	2833798	2914925	4421383	3870863	3767624	3572988	1	1	1	1	1	1	1	1	1	1	1	1	978246	1097558	1162409	2981458	1	3014465	1765891	1825800	3641304	1	1	2193254	(166.059, 390.66)(148.04822, 428.33002)(167.07124, 75860.25)(168.07439, 6977.354)(169.07767, 380.03003)(149.06073, 6709.954)(150.06413, 507.14334)	7.095
Dihydro-p-coumaric acid	Phenolic acids	Hydroxyphenylpropanoic acids	4863610	2819824	359149	3066837	2838011	2739082	2833798	2914925	4421383	3870863	3767624	3572988	3169488	3161198	8800671	1	1	1	2292429	2375026	2416397	1170713	1133642	1064495	978246	1097558	1162409	2981458	6186060	3014465	1765891	1825800	3641304	1371871	1526442	2193254	(167.06276, 7398.2734)(148.59589, 2322.73)(152.0584, 3921.0234)(167.2538, 62969.23)(168.18057, 7961.007)(169.07693, 454.09198)(149.06075, 10855.75)(150.06166, 3701.1287)(189.66905, 23982.572)(190.46028, 6166.416)(191.0621, 2196.37)(173.04277, 135.37)	5.34245
Dihydrocaffeic acid	Phenolic acids	Hydroxyphenylpropanoic acids	4831952	4627425	4469938	6816046	6316746	5906540	1158491	898104	1138751	259557	251441	246208	725663	798554	1704318	241554	191633	155366	7323795	7667486	7952399	20200000	19300000	18000000	557119	583930	804489	2085798	2064985	2155321	2543799	2266714	2135093	264611	298153	295157	(182.89697, 2135.2866)(184.06439, 3834.6501)(165.50505, 6707.7607)(168.0529, 4673.87)(183.32413, 210176.7)(184.43219, 26454.568)(185.67264, 3843.7195)(165.05576, 31638.428)(166.05894, 2725.5325)(205.881, 78487.45)(207.05083, 5772.643)(208.05994, 1373.3667)(189.04016, 1362.7284)	5.9803
Isolariciresinol	Lignans	Lignans	1	1	1	455142	443037	423090	1	1	1	1	1	1	1	1	1	1128369	1059307	994247	1	1	1	645721	587416	592318	1122059	1225017	1270884	1	1	1	1	1	1	1457690	1532656	1622665	(343.15485, 3124.7224)(365.13654, 24626.262)(366.13983, 3795.515)	17.492
Episesamin	Lignans	Lignans	3553890	3261116	3307826	11900000	11200000	10700000	2680523	2652507	2663332	2973241	2896512	2801162	179040	1307999	202239	312298	299505	284755	1404517	946823	1790721	2044086	1886543	1846727	1	1629256	336888	3134409	3147873	3184175	2203964	2156340	2079708	1580272	1725607	1777527	(355.32785, 47727.85)(356.1076, 9234.062)(357.11237, 1178.8593)(337.59998, 11940.963)(338.892, 1369.885)(339.10663, 15225.923)(340.11084, 3477.46)(359.73087, 2987.2432)(360.13147, 2109.345)(338.67963, 48500.18)(339.56573, 9396.098)(341.1166, 1646.32)(379.83167, 1679.6183)(381.28458, 3465.675)(382.11786, 4844.0176)(361.59528, 15294.859)(362.0935, 4445.27)	5.40883
Conidendrin	Lignans	Lignans	622017	673822	617294	1297309	1195543	1124585	916775	517548	1009167	2085509	2032375	1977203	125078	520182	209343	781410	733228	715501	936526	488650	547944	219029	4141805	4059410	1	377815	406909	445686	111119	383414	518511	426955	412905	1	1	1	(358.4688, 20693.436)(359.13724, 5559.7544)(359.8539, 2283.953)(360.14493, 3715.1433)(339.11078, 40119.22)(340.49353, 8148.26)(341.45444, 2625.0933)(358.47488, 8052.2905)(358.13812, 4471.95)(359.13678, 421.815)(341.8848, 9534.718)(341.33136, 2920.0962)(344.1352, 23667.35)(382.21255, 4607.208)(382.792, 3048.46)(364.85822, 136668.81)(366.10977, 21842.416)	6.51982
Pinoresinol	Lignans	Lignans	943956	903768	898473	792016	671849	630232	1409884	1453704	1430450	555040	527606	544621	483638	1	405688	1	1	1	2092083	2226894	2260807	563126	494244	435747	313944	364330	382036	204065	199794	193737	1	348813	280409	394082	1	488363	(358.75735, 6071.8374)(360.48325, 1933.6099)(340.74768, 13479.913)(342.34, 24990.174)(343.6408, 12176.21)(344.14624, 2184.76)(345.14404, 5074.9434)(359.30658, 22329.0)(360.15247, 9642.294)(342.57266, 16397.85)(343.0723, 5429.7656)(343.39938, 78569.11)(345.1537, 61639.09)(346.1562, 8262.91)(381.6286, 2426.58)(364.92432, 2968.588)(365.6256, 684.6775)	8.56082
Cyclolariciresinol	Lignans	Lignans	3642177	3524351	3317651	455142	443037	423090	3080556	2155687	3178230	1517564	1512945	1451440	1807338	1840950	1945315	1128369	1059307	994247	1941164	2043838	2187158	645721	587416	592318	1122059	1225017	1270884	1088176	1097599	1081460	3498093	3478354	3456937	1457690	1532656	1622665	(360.1515, 4109.766)(342.87714, 24121.096)(344.65222, 32216.516)(345.65356, 4272.5386)(346.15424, 339.975)(361.16537, 33778.047)(362.1703, 6649.47)(363.1728, 1220.18)(343.1551, 10212.474)(344.15552, 3102.615)(383.50003, 4677.723)(384.14795, 979.0068)(365.37726, 14996.854)(366.80823, 3356.2095)	11.666
Secoisolariciresinol	Lignans	Lignans	1162613	1024577	1067700	770338	685329	630577	621489	1178238	635765	877090	858218	1195179	3153277	3461143	3607926	1	1	1	3422001	3672045	3833667	4616482	4222256	4051185	860139	944469	982769	630205	546352	476357	6774176	5492924	5369616	12700000	13700000	14300000	(363.1073, 1277.98)(344.6645, 5491.6265)(345.14413, 327.8033)(365.58405, 1913.168)(347.3861, 6009.275)(347.1738, 2062.5725)(388.059, 1846.56)(389.1722, 6522.502)(367.18344, 75173.01)(368.3948, 13696.421)(369.1555, 5599.13)	4.66867
Sesamolin	Lignans	Lignans	1	1	1	524863	482250	465465	189819	214952	197914	583915	594080	2246703	331931	341252	341351	1	335980	436000	276906	251449	1	691553	653008	551385	148550	172941	172353	195231	188092	186286	194920	191424	188406	429383	756492	803812	(371.60504, 16184.526)(372.60748, 3233.7214)(355.1023, 21957.814)(356.10574, 3327.165)(355.10388, 27532.186)(356.10748, 8345.75)(357.11084, 1163.835)(394.76254, 28315.297)(396.09964, 6440.0273)(397.0961, 2252.26)(379.10147, 1412.886)	12.5174
Sesaminol	Lignans	Lignans	272826	1329688	1	524863	482250	465465	189819	214952	197914	583915	594080	2246703	331931	341252	341351	1	335980	436000	276906	251449	404284	691553	653008	551385	148550	172941	172353	195231	188092	186286	194920	191424	188406	429383	756492	803812	(371.6509, 15476.487)(372.58344, 3259.5942)(354.91458, 19496.215)(356.10574, 3327.165)(372.1202, 798.39996)(355.10388, 28849.62)(356.10693, 8623.566)(357.11084, 1163.835)(395.0986, 21849.42)(396.09964, 6440.0273)(397.0961, 2252.26)(379.10156, 1264.525)	11.0321
Arctigenin	Lignans	Lignans	838659	839331	845230	494779	457688	424063	168259	186445	183272	1317633	1288204	1253342	262760	248362	275078	1	1	1	352328	382511	381454	437940	304355	280007	472210	557360	581112	523357	100996	304426	1162737	1109347	1086540	1	1	393328	(372.68076, 16063.788)(374.0885, 6101.4834)(375.66968, 1997.9268)(377.1625, 9758.013)(356.49933, 10247.697)(358.3999, 21497.393)(373.1613, 5796.3564)(374.1611, 4082.3)(375.16562, 722.4167)(355.82895, 6562.33)(357.16376, 2136.055)(357.1498, 488.95)(397.8838, 20431.277)(398.48798, 6477.578)(399.15298, 3701.5967)(377.78653, 13261.46)(378.47827, 4276.0767)	7.64768
7-Oxomatairesinol	Lignans	Lignans	14100000	1	13300000	2188201	2026701	1956457	2585613	2553845	2556637	2765608	2701108	2611548	1528768	1599654	4814183	1676369	1585389	1553284	2105239	1	2321650	2706038	2495949	2446303	1573965	5046232	1897187	3508065	3512521	3552540	2075265	2060503	1959601	712142	793075	830444	(373.91605, 18783.14)(375.83627, 8612.518)(376.28198, 15923.6875)(355.13385, 53426.367)(356.2024, 9251.503)(357.1126, 1975.2821)(359.11865, 2209.46)(374.76923, 6115.7485)(376.47568, 23158.82)(377.1432, 8530.743)(378.1503, 1116.23)(359.9093, 4772.003)(360.13147, 2010.26)(399.35217, 3428.89)(380.3498, 2306.1167)(381.34073, 2527.4355)(382.11865, 3988.202)	4.62922
Isohydroxymatairesinol	Lignans	Lignans	1069334	1258107	1011974	351116	327158	306872	1034451	2747369	1055375	2419469	2344924	2292102	403682	548632	455184	178263	163104	153348	1367908	1734511	1555887	413979	373489	358649	1	195731	197932	280625	318315	251313	386296	375383	356066	328983	361033	388726	(376.4991, 11885.215)(377.1459, 3370.043)(379.14105, 2089.52)(357.62927, 3240.6152)(358.13037, 3200.9968)(359.1257, 5027.737)(360.14365, 5411.973)(361.14136, 7309.8667)(375.93127, 2938.206)(376.1485, 310.98)(357.13437, 23363.271)(358.1357, 5381.686)(359.13962, 1255.36)(397.665, 4824.9854)(398.70486, 938.56006)(381.11942, 3951.7727)	9.06523
7-Hydroxysecoisolariciresinol	Lignans	Lignans	890268	777155	1	1	1	1	213236	234267	222330	609183	561506	560906	165404	175072	169518	306858	280791	301278	223272	301085	330408	591220	548615	496740	111962	135941	148108	181255	197323	196413	275698	1	1	138478	167552	155171	(376.54797, 4045.0735)(376.21606, 2196.2568)(356.66373, 4856.4087)(358.2069, 559.54004)(378.62433, 2535.4958)(357.33063, 10060.43)(358.20566, 4041.768)(398.3089, 5191.34)(399.20276, 4683.609)(401.00323, 6055.594)(381.1874, 1959.0767)	8.21374
Todolactol A	Lignans	Lignans	2013574	469739	1913390	333854	307794	297665	1470285	1335718	1346181	1217820	1199092	1180317	610137	563517	609177	1	1	1	3115591	3324257	3458626	4080903	3770390	3625733	975210	2383390	2453833	618241	667353	656019	269350	1855092	236121	69357	73385	397405	(376.74933, 9527.126)(377.89935, 3362.535)(358.54935, 6125.28)(359.93756, 845.588)(379.1116, 25134.033)(378.66724, 9524.9795)(379.1665, 2904.355)(360.18878, 14861.096)(361.0322, 4905.426)(363.15707, 902.3934)(401.4826, 19498.385)(400.4329, 8579.429)(401.1543, 3062.07)(382.52045, 8527.152)(384.14343, 3590.8882)	6.39152
Medioresinol	Lignans	Lignans	578042	393711	410965	1	1	1	918134	941742	938690	332008	330149	323555	444681	518666	470146	1	1	1	1713840	1824938	647054	506263	474732	1	1	1	1	467539	475700	484851	1527649	1445850	1398620	1	1	1	(388.46292, 15370.193)(389.49557, 4739.4116)(370.1504, 14908.227)(371.15128, 2516.9465)(389.89285, 4297.7485)(391.77652, 4911.006)(392.17792, 2125.55)(371.15002, 18678.754)(372.15314, 3361.7656)(373.1599, 387.86398)(413.48767, 2519.8455)(416.1552, 9460.18)(393.73975, 3497.6687)(394.88385, 1022.03625)(397.1538, 289.44)	7.68995
Dimethylmatairesinol	Lignans	Lignans	1799958	1835283	1587838	1	1	1	532812	141370	802630	145717	1	1	731789	718762	698511	1	1	1	477180	608871	658786	591718	561026	884031	154974	174207	181596	1173149	1030257	1157598	729137	648470	691827	200332	235843	245195	(388.67386, 4503.7856)(368.79025, 3536.3486)(369.9166, 2724.3901)(392.02512, 2011.96)(370.63345, 4834.6396)(372.4006, 3569.07)(374.18448, 566.1533)(410.3104, 11125.008)(410.6188, 3215.2412)(391.44247, 4573.3403)(392.68405, 2292.9402)	4.78695
1-Acetoxypinoresinol	Lignans	Lignans	1047366	1	991903	4850568	4439673	4270141	2153800	2177823	2200657	3616273	3545084	3457846	2337714	2384570	2407786	2215721	2165731	2092537	1006861	1056755	1128508	5086887	4734666	4569657	596898	662565	695212	2423850	2469264	2536609	1319316	1298599	1	164636	162957	163541	(416.14734, 758.4766)(403.07388, 1462.8707)(403.1412, 607.8)(417.15515, 54187.234)(418.15872, 12872.844)(419.1625, 1759.5352)(400.7005, 1418.5581)(400.14734, 195.77667)(440.77182, 1295.4437)(442.15652, 284.21667)(423.3607, 3443.3152)(424.13257, 1898.9434)	9.26305
Syringaresinol	Lignans	Lignans	2820402	2493433	2643374	899153	1005054	941166	2166421	2287741	2217842	1692864	1710695	1695769	875597	895307	931840	234595	218793	214706	1341771	1411837	1450550	797116	905785	876725	1376506	1506548	1549102	1276845	1274322	1287226	676816	660977	632706	161981	192031	212311	(418.86923, 6628.1245)(419.66983, 3883.7249)(400.1506, 1294.79)(419.1705, 7458.978)(420.17563, 1751.9633)(401.16052, 46870.59)(402.16376, 10783.996)(403.16708, 2259.3457)(441.60873, 8719.389)(442.15714, 1950.0065)(443.16687, 1688.8501)(423.1298, 302.83)	9.30353
Lariciresinol-sesquilignan	Lignans	Lignans	1258550	1189389	1141020	611773	559089	529220	808901	307516	803264	1	122371	116276	584769	602150	640258	1	162135	168089	1327197	1413208	1767156	384890	576060	287280	127766	184783	195943	2115902	500212	204108	193609	177837	175586	397645	290380	176749	(556.21857, 1035.0182)(538.69476, 7303.0176)(539.4417, 1946.1066)(541.2279, 291.98)(558.2555, 26462.81)(559.25903, 9032.204)(560.2534, 1035.0155)(540.22784, 9575.192)(541.2332, 2065.953)(580.55194, 5969.4004)(580.2111, 3804.73)(563.07684, 28578.748)(564.21436, 8691.853)(565.2136, 1508.21)	7.26306
Secoisolariciresinol-sesquilignan	Lignans	Lignans	4627729	4379859	4262599	708317	1	620200	989767	1012583	981357	165673	176907	171764	1549535	1595269	1678005	1	1	1	1869930	2052448	2101183	688371	622480	609539	1	1	1	2021445	2294024	2053558	1	1	1	317789	351672	383864	(558.2551, 12031.464)(559.2585, 8263.353)(560.2473, 1192.8)(540.23645, 57660.04)(541.23956, 15892.958)(542.24866, 6657.1367)(543.2451, 650.22)(561.27484, 1438.88)(584.58154, 13838.035)(585.58575, 4342.628)(563.2106, 13252.743)(564.21423, 4188.8286)(565.2139, 588.14667)	9.10892
6beta,7beta-Epoxy-4beta,5-dihydroxyguaiane	Limonoids	Limonoids	780152	1	326649	2490233	2366440	2285744	301438	300630	1	169737	145796	148870	352334	329102	381383	15400000	14800000	13700000	177767	190812	218936	2306704	2023702	1977750	1256291	985848	1055910	638298	628601	639687	173349	1245611	1220257	3180182	3495964	3641974	(239.52887, 5009.3354)(220.17847, 7297.7896)(239.45189, 12304.066)(240.70451, 2446.2114)(221.19043, 100566.59)(222.1935, 18230.697)(223.20062, 3589.2498)(261.89935, 3245.885)(244.53793, 5138.1006)	8.85503
6beta,7beta-Epoxyguai-4-en-3-one	Limonoids	Limonoids	1899351	1	1822807	16500000	15800000	15100000	1	389498	1	2854664	2841519	2692149	443944	462217	497999	2643822	2581230	1740869	1641534	1787412	1753224	33300000	30900000	30300000	1741831	1946245	2014941	1325550	843027	750775	2631812	2534533	2468230	1784138	1897829	1958075	(258.0674, 23583.28)(258.15408, 7047.7944)(259.1521, 436.7667)(217.15942, 4618.973)(218.1638, 225.26)(234.15941, 4800.6587)(235.17001, 212420.95)(236.17262, 31803.844)(237.17772, 7836.5093)(241.14543, 2146.386)	12.5263
Artemisinina	Limonoids	Limonoids	8066630	7454706	8120396	6925111	6570761	6360880	1431622	1444019	1516764	2751833	2632105	2621597	613599	612862	625220	272645	782242	759959	794590	792336	744145	5310393	4825434	4713281	3473766	3872900	4035310	779952	659025	700424	3560943	3538464	1	10100000	11700000	12100000	(283.31992, 28582.336)(284.35754, 6741.7593)(287.16083, 3793.354)(264.47604, 3931.4387)(266.13983, 45217.758)(267.13837, 18511.09)(268.13928, 1667.575)(284.79703, 12296.71)(284.15933, 2463.2397)(265.86472, 26717.348)(266.77325, 6118.114)(268.65485, 1215.325)(306.53223, 44167.316)(306.89066, 12161.681)(307.14413, 2165.385)(287.29285, 30462.213)(288.29578, 8126.9624)(289.1237, 2795.9065)	6.30905
Cedrelone	Limonoids	Limonoids	431886	401347	412458	355182	349858	326429	1034562	1068485	1072056	970288	967960	946876	493780	506734	527935	214415	208143	200181	311646	322211	347048	454697	440292	417560	129515	137358	147524	561423	544762	559954	369488	364633	354543	252429	265165	268529	(406.20215, 21676.803)(407.2057, 4979.907)(408.20868, 261.46)(446.20346, 34891.465)(447.2062, 7411.154)(448.2142, 2937.8)	18.6412
(+)-Tirucallol	Limonoids	Limonoids	782733	729104	741302	1	1	1	1901618	1965239	1959222	1614119	1565948	1565631	474437	480065	492813	108829	98683	94812	1793831	1854981	1940854	152999	112431	99809	247549	287012	308128	1266777	1292026	1322000	2056397	465045	467788	1142482	1222939	1259171	(426.39307, 2416.9036)(412.39224, 2988.2415)(413.3921, 3450.63)(412.3929, 1910.04)(449.37262, 24124.906)(450.37506, 7835.2183)(451.3653, 2150.49)(452.3736, 318.62)(431.8653, 12463.725)(433.01956, 3917.1829)(433.37827, 289.07333)	17.8954
Deoxylimonin	Limonoids	Limonoids	807407	766980	756217	1159877	987161	912211	809934	802581	782679	1055930	979502	971154	645772	610168	590628	609179	564805	527729	367693	398742	423798	1328772	1221187	1216682	1708068	1939167	2001195	583133	581144	581839	580550	579768	563701	3476214	3910215	4167241	(437.55978, 41743.99)(438.19745, 10671.373)(439.2013, 1985.8793)(455.2046, 5850.64)(437.19412, 68822.02)(438.19714, 16421.758)(439.20068, 2186.5535)(478.1879, 33482.957)(479.1915, 8201.739)(480.1941, 597.31335)	14.4829
Cedrelone-22-epoxide	Limonoids	Limonoids	324927	297220	314165	1	204245	191933	2802378	2859435	2868441	1892859	1796777	1768726	414966	437593	464575	483883	421906	429980	4670254	4899974	4991629	1020849	921993	875999	1916782	2085506	2138037	7080309	6991418	6964171	4008082	4058725	3992782	379685	443530	479742	(440.21014, 36058.805)(439.92288, 10676.597)(441.21448, 5730.495)(420.68774, 67617.83)(421.19016, 17090.56)(422.19177, 2950.9001)(441.4738, 34974.824)(440.2114, 31238.23)(441.2147, 5675.18)(463.34756, 5785.3604)(463.56595, 1520.9755)(445.6975, 1165.905)	5.32292
Cedmilinol	Limonoids	Limonoids	820066	699510	1721673	195420	508138	214898	415912	189393	184266	184277	169746	1	1	566380	608181	368719	350058	347351	880650	987296	1044532	953265	867785	802142	268457	1	294261	1100442	1086057	1088945	88420	369223	797448	1	1	1	(441.3361, 8910.689)(441.96832, 2170.5066)(445.1957, 896.97)(422.97202, 2812.241)(424.78247, 1399.5819)(427.1948, 379.94)(443.2029, 480.0)(446.2033, 15368.32)(447.2058, 3522.63)(424.59558, 6464.1694)(425.33163, 3588.076)(429.2074, 533.96497)(463.85864, 5498.903)(465.63684, 1562.2745)(468.18655, 4586.657)(469.18893, 456.13004)(447.96786, 5907.2485)(449.17413, 2378.545)(449.84058, 947.44)	4.06503
Nimonol	Limonoids	Limonoids	760110	714370	698843	530192	473714	428997	173909	185217	183591	1187902	1151262	1140550	187530	201165	208921	428293	411462	381711	1	290011	291086	493861	464753	453712	443417	493489	514719	274543	271219	271370	705226	722203	718575	2970489	3204968	3417472	(453.2462, 10200.117)(454.24985, 409.75668)(455.26, 810.9367)(434.2367, 2645.73)(435.25323, 13339.04)(436.25912, 2370.0737)(477.2466, 1715.4033)(457.2336, 8258.082)(458.23618, 2896.9797)(459.2464, 241.28)	16.1489
Deoxy-alpha-limonol	Limonoids	Limonoids	469650	459552	447381	1	1	1	464868	144367	151085	205520	182232	1	1227966	1375988	1333220	5859719	5440178	5352131	100869	104148	110645	1	242296	241773	164727	207476	223267	478616	464968	482144	4032561	4073337	4016866	379685	443530	479742	(457.51544, 1016.0721)(460.2164, 1488.63)(440.00766, 10977.842)(439.6335, 1737.6986)(459.22964, 1964.1167)(443.13904, 36729.33)(442.72147, 18318.072)(441.21457, 5712.0566)(479.97342, 31428.748)(481.35284, 10988.067)(482.34967, 3744.8445)(483.20142, 38602.457)(462.0316, 6464.6934)(463.1993, 1752.1713)	7.0822
Cedrelone acetate	Limonoids	Limonoids	1550399	1401297	1374051	831163	799918	776605	1489959	1541130	1482143	274295	256523	253492	1	524072	91312	200186	185056	172154	1021385	1083123	1133982	1323029	1200188	1084441	1	1	1	1568402	1599339	1638871	623553	617712	612074	215859	291601	325287	(465.72586, 2611.0825)(466.2151, 263.11)(446.97815, 17946.621)(447.39392, 5322.032)(450.222, 2374.25)(465.22336, 5900.107)(466.2265, 333.82)(448.21832, 27086.2)(449.2214, 6845.2866)(450.22305, 1684.13)(488.92816, 6554.106)(491.2283, 830.43427)(470.67523, 3306.0093)(472.20905, 1347.7124)(474.2193, 101.965)	6.78836
Azadironolide	Limonoids	Limonoids	1	671452	605561	129721	116924	1	1	1	126788	1	1	1	474973	483207	522635	1	1	1	1	423431	1	236951	213117	212738	1	1	1	1	1	1	1587236	1527792	1448482	600427	661796	700583	(468.25623, 20280.87)(469.2583, 5802.2876)(470.27008, 960.954)(455.2515, 331.69)(469.2606, 4799.335)(451.24585, 16289.04)(452.24963, 2075.0166)(492.60477, 3544.6938)(492.22867, 371.69666)(473.23175, 1116.2775)	11.6976
Hortiolide�E	Limonoids	Limonoids	1	416278	426602	1	152529	136601	320795	323875	323573	1	1	1	505475	505607	1	712448	658742	674323	1170750	1467806	1284989	386110	104670	101586	1	1	1	1	1	1	7058215	7142039	6982318	1	1	1	(468.59415, 1439.988)(467.19385, 859.775)(449.31155, 2493.735)(454.2102, 226.8)(472.46008, 5580.722)(451.70142, 16364.756)(453.2056, 3647.1116)(452.202, 329.43)(490.191, 4802.146)(491.39273, 1246.5781)(492.1964, 2328.2075)(493.2064, 148.92)(472.92917, 13024.823)(474.98715, 2769.381)(476.19345, 35088.562)(477.1965, 8772.05)	8.27677
Amoorinin	Limonoids	Limonoids	1	905888	875892	577727	518729	497413	385677	376498	372907	366692	352052	345467	269677	288454	282528	222147	1	1	1337021	1420439	1455633	679044	629119	631649	1	1	261756	1	1	1	330308	413231	316648	931830	1022642	1084014	(471.8764, 17241.145)(473.2423, 8951.856)(473.24307, 1685.9733)(453.9779, 28824.059)(454.981, 7267.188)(454.74188, 1152.8925)(455.2237, 3357.74)(457.23602, 3840.145)(493.20877, 18719.564)(494.2088, 3462.447)(475.2075, 10930.849)(476.20602, 2866.2297)	10.5431
11-Oxo-7alpha-obacunol	Limonoids	Limonoids	1007502	916596	901052	552055	480035	455706	154490	156911	157724	502502	475092	488365	1	140333	140797	580717	548175	525819	583828	613835	657250	1344756	1200433	1185283	127639	152451	153933	1	1	1	496642	494256	478906	879489	994950	289252	(472.20276, 22106.768)(473.20578, 2664.41)(474.21777, 11028.673)(475.22025, 2481.085)(477.2115, 532.36)(455.2047, 7082.4663)(457.2036, 13179.924)(495.1916, 32138.55)(496.1947, 6061.0596)(497.19775, 885.825)(482.18484, 34206.156)	13.6536
Isoobacunoic acid	Limonoids	Limonoids	790807	742100	750159	222205	192352	188369	398186	405481	218484	346091	340929	342221	823281	861279	877583	690689	656211	621536	1	1	1	1612485	1442022	1432269	549192	635519	677225	122308	121209	125146	225861	214207	206996	1819874	437060	464956	(472.6678, 5792.5757)(473.20212, 3733.0066)(457.203, 4150.8525)(474.21817, 11021.865)(475.2216, 1797.4634)(495.625, 29930.982)(496.47043, 7304.2144)(497.19644, 1164.8733)(478.9139, 8056.84)(480.44632, 6291.8374)(481.69617, 1322.9183)	7.6684
Limonol	Limonoids	Limonoids	790807	742100	750159	222205	192352	188369	398186	405481	1	346091	340929	342221	823281	861279	877583	690689	656211	621536	1	1	1	1612485	1442022	1432269	549192	635519	677225	122308	121209	125146	225861	214207	206996	1	437060	464956	(472.75253, 5123.84)(473.20035, 4486.23)(456.7746, 2284.2144)(474.2182, 11557.666)(475.2216, 1797.4634)(495.625, 29930.982)(496.47043, 7304.2144)(497.19644, 1164.8733)(478.80136, 8601.787)(479.89624, 4800.8667)(481.69617, 1322.9183)	7.69755
Odoratone	Limonoids	Limonoids	303078	233590	29200000	2810532	2533620	2479808	338173	244058	349603	748920	488051	720349	275455	286189	290604	255848	237709	227367	414738	355376	469462	3536483	1034397	3202295	1386173	1561983	533759	7183439	7231245	7375070	427829	439174	431258	504669	547650	560065	(473.10657, 3014.9749)(475.0275, 1406.7866)(476.37085, 467.69)(457.74902, 2932.6238)(458.0187, 389.82834)(473.36353, 46142.64)(474.36682, 14465.558)(475.37054, 3184.0378)(458.93558, 9741.132)(459.69876, 4737.346)(457.3587, 332.6)(497.8315, 106982.086)(498.70734, 28931.963)(498.01587, 15540.723)(499.34662, 2559.635)(501.3749, 1552.75)(478.56955, 14811.868)(479.3381, 3989.25)(480.34756, 461.548)	15.7133
Deacetylnimbin	Limonoids	Limonoids	924026	886670	866845	794901	715333	687483	152358	163959	160465	334809	322460	322928	143029	1571435	161583	617551	600998	576887	1	1	1	696186	661564	638902	120170	139617	146156	95322	97710	98552	483962	479184	463680	1053310	1198007	1288551	(480.20734, 9705.065)(481.21045, 1547.83)(522.6293, 19192.611)(523.6324, 5366.986)(524.22565, 6136.331)(525.2321, 4311.4165)(506.06696, 3433.7742)(508.46384, 4641.407)(509.2179, 8088.72)	8.9464
Gedunin	Limonoids	Limonoids	1703803	1600177	1575897	1168390	1074778	1051271	251163	327025	318844	274825	260074	248204	425467	447886	460625	113670	1	1	321506	303170	524973	557564	506676	466709	1	1	1	1	145989	143696	421103	410297	384510	1	179307	197543	(482.23694, 4689.4976)(483.2396, 1775.95)(464.53516, 17144.56)(465.56998, 2932.778)(466.21762, 444.27002)(484.25388, 13716.477)(485.25717, 1903.4933)(467.24695, 1479.4199)(468.75092, 1283.51)(507.2218, 2314.1855)(489.71616, 7294.2817)(490.7186, 1162.1434)	6.27552
Hortiolide�C	Limonoids	Limonoids	3598944	3410707	3354988	1529225	2069039	1358541	733867	123611	96138	1059049	1053686	1031641	1265832	1378836	1375781	468501	447909	429818	401235	329695	1	3055825	2827936	2754938	558466	625591	661937	758345	774963	678285	259390	248804	229197	1	1	1	(484.20508, 3863.5378)(485.19986, 423.2333)(468.72943, 1621.2266)(472.21664, 3161.1565)(490.22803, 11805.104)(491.23117, 1808.8542)(508.19904, 53370.324)(509.64648, 15700.637)(510.2026, 4317.2744)(491.53027, 26867.14)(492.67117, 8793.992)(494.20883, 1673.1976)	8.02205
Hortiolide A	Limonoids	Limonoids	1215052	1184227	1124866	1770538	1600805	1537009	557186	528635	463146	1180073	1143191	1144202	540881	572015	588099	747821	729326	701311	355923	212834	400031	1405983	1333995	1263251	1	100777	113217	1	1	1	239997	235512	235363	186769	209872	219235	(492.20258, 43436.934)(493.2061, 12298.409)(494.20923, 2221.4946)(473.18045, 351.38)	10.6012
Hortiolide�D	Limonoids	Limonoids	461395	455315	479763	2154630	1924941	1852416	1028433	1042217	1324473	1107913	1070886	1070908	2022708	2170510	1630692	3038280	2810839	2813632	243741	270685	287624	1344445	1232749	1140270	218248	238841	291526	856448	852031	857374	161216	142581	144337	1421532	1599310	1697485	(500.50986, 21381.256)(501.71066, 8619.421)(503.20834, 1568.2866)(482.19617, 8758.405)(483.1982, 4635.394)(501.20377, 75421.09)(502.20663, 22704.447)(503.20956, 3574.9368)(483.4044, 25220.668)(484.40594, 5343.9014)(485.5327, 5160.8247)(487.19946, 2013.1133)(524.19403, 3786.8723)(525.57214, 2640.4016)(507.3949, 6286.3364)(507.8596, 1851.819)(508.19815, 8722.359)(509.20322, 1111.13)	4.72992
11-Oxo-7alpha-obacunyl acetate	Limonoids	Limonoids	1024468	869631	865650	737662	630732	597645	170029	252985	263306	652029	612992	619156	859708	914395	935629	751948	714123	671078	345294	376893	390042	1838094	1635078	1630470	1	1	1	465757	1	1	745067	1	1	411266	474922	510166	(513.7748, 3998.6077)(515.23206, 1498.345)(495.9164, 25965.207)(496.33362, 5693.3936)(497.19644, 1213.0433)(514.2268, 9536.745)(515.2267, 1628.8)(500.2126, 287.62)(540.7209, 1754.47)(537.2087, 560.79)(518.63715, 4695.744)(520.19025, 360.55)	11.0839
photogedunin	Limonoids	Limonoids	271207	346351	252098	300018	268449	273305	218034	228264	229068	84298	1	1	859318	915023	935012	92121	1	87167	154155	167678	147478	268640	253009	246579	1	160719	171284	689881	501552	1	395264	393905	366844	1	1	1	(514.2212, 4995.246)(515.23065, 647.375)(497.32803, 10993.783)(497.2068, 5321.7534)(521.2431, 615.37)(500.2135, 5750.5)(537.9418, 9114.23)(539.0925, 2597.814)(543.2229, 691.87)(522.3686, 2468.2517)(523.89105, 973.0434)	7.71312
11b-Hydroxy-7alpha-obacunyl acetate	Limonoids	Limonoids	522778	445388	313303	88045	341082	347435	199085	201099	191712	89858	88498	81487	412649	441397	117884	1	1	1	2582077	2823978	2989225	315154	257850	1	127766	185608	196957	689881	686725	679710	187700	133045	175312	1	1	1	(515.23285, 20929.086)(516.2345, 4049.46)(500.21317, 5902.9297)(538.26434, 21560.506)(539.22455, 5947.4863)(522.6039, 3969.0642)(522.883, 4136.2837)(524.2279, 11048.46)(525.2327, 2731.44)	7.41728
Toosendanal	Limonoids	Limonoids	1258550	1189389	1141020	611773	559089	529220	808901	307516	803264	1	122371	116276	584769	602150	640258	1	162135	168089	1327197	1413208	1767156	384890	576060	287280	127766	184783	195943	2115902	500212	204108	193609	177837	175586	265493	290380	176749	(556.21857, 1035.0182)(538.7797, 7531.721)(539.5607, 1958.4281)(541.2279, 291.98)(558.2555, 26462.81)(559.25903, 9032.204)(560.2534, 1035.0155)(540.2285, 9751.692)(541.2343, 2224.6284)(580.55194, 5969.4004)(580.2111, 3804.73)(563.1391, 30566.596)(564.21436, 8691.853)(565.2136, 1508.21)	7.26306
11beta-Hydroxycneorin G	Limonoids	Limonoids	3268709	3006116	2954065	3334153	2901082	2738457	233487	167489	232476	661854	627432	607164	451408	468904	798913	1282975	1261516	1161424	203137	2138231	2273450	1937671	1771318	1725906	1194801	1326091	1432528	126878	130246	125509	529160	504457	498698	423177	473230	510400	(557.9179, 18330.219)(559.25903, 10524.779)(560.25446, 2285.1501)(598.6445, 60886.36)(599.6474, 18427.434)(600.77356, 6103.8247)(601.74994, 1436.6066)(584.7438, 578.8)	7.83389
Isonimbinolide	Limonoids	Limonoids	763194	914755	912209	369684	328339	674359	1264869	1215591	1226864	431042	412515	387578	176861	188019	188630	1314689	1239979	1193195	572222	633792	673769	1	791664	788992	136379	159099	170247	296259	294251	282119	1	1	1	574294	634936	692611	(575.46405, 19786.264)(576.4654, 5884.962)(577.2241, 1457.46)(555.0761, 15848.422)(556.2242, 4375.5234)(556.2281, 311.42)(574.2306, 16321.15)(575.2272, 7289.68)(577.2274, 2249.28)(557.2211, 7238.8677)(558.22455, 1107.7483)(596.64374, 13553.389)(597.3229, 5177.0254)(598.56476, 1147.9221)(579.5044, 24313.797)(580.2128, 16029.243)	7.75725
11-Oxocneorin G	Limonoids	Limonoids	1483937	1339460	1325778	1289354	1151947	2935732	925920	917789	909770	1646744	1575679	1569508	175651	192849	185358	213188	190892	405017	384433	412209	466935	3879534	3625646	3446407	401505	451570	492238	839123	853678	851458	321938	310502	303158	1069101	1165810	1244667	(578.2301, 10282.053)(556.22205, 1916.3209)(597.22437, 44023.105)(598.22723, 15553.96)(599.23016, 4040.3022)(581.0493, 1785.6864)(583.22235, 10290.964)(584.2346, 2440.86)	8.7705
Quivisianthone	Limonoids	Limonoids	1	1	1	422386	375819	359370	1	1	1	1	1	1	1	1	1	1	1	1	218261	248142	259737	126227	111736	1	1566450	1734048	1761928	146171	147281	153598	1	1	1	1	1	1	(586.1949, 30507.637)(587.1981, 8736.203)(565.2693, 799.33496)(609.2717, 52935.145)(610.27454, 20323.086)(611.2784, 3319.1865)(590.7713, 275165.56)(589.2683, 2342.9734)	9.49281
Amotsangin D	Limonoids	Limonoids	579670	536939	514439	1	1	1	459664	462897	464888	1	1	1	372381	1572095	445552	1	1	1	2602360	2857387	3066599	1	1	1	1	1	1	652385	642235	635142	718403	707658	718448	1	1	1	(586.2516, 23698.588)(587.2571, 9709.964)(588.2675, 83043.53)(589.2705, 23578.375)(590.2723, 4917.823)(568.756, 9787.806)(571.2598, 5447.48)(572.25824, 1144.48)(591.29144, 4124.436)(567.2565, 707.1)(607.25354, 22734.086)(608.2567, 7484.5806)(594.44727, 1830.4622)	15.873
1-O-Deacetylohchinolide A	Limonoids	Limonoids	15900000	15100000	14700000	4354567	3859548	3577584	2377601	3719082	3805135	724413	685092	674651	37400000	38700000	40700000	841160	824201	781909	4458714	4919403	5041007	5372017	4843651	4794230	207231	220647	263126	38700000	38700000	39300000	14200000	13900000	13800000	732342	785793	809861	(587.2426, 448.2)(609.27264, 632302.9)(610.2757, 246094.69)(611.2783, 51762.785)(592.29224, 3131.2366)(593.2957, 448.21667)(627.27026, 98294.82)(628.27344, 37749.395)(629.2767, 13595.846)(630.27985, 2479.9614)(610.5699, 68081.16)(611.4895, 27877.764)(613.2445, 11549.7705)(614.24725, 2026.6499)	12.4822
Amotsangin B	Limonoids	Limonoids	14600000	13500000	13400000	138853	117400	113618	7156405	7331405	7198923	199016	195199	184600	35400000	37500000	38700000	143950	119705	113423	24800000	26400000	26900000	203946	181578	181110	225101	263454	287391	6142011	6194383	6382113	12000000	12000000	12000000	400467	439989	464323	(594.7833, 208709.55)(595.7862, 42489.734)(596.28577, 11288.645)(597.28827, 1007.8616)(638.617, 65076.043)(640.28595, 29885.746)(641.28864, 5655.1865)(623.2854, 3086.7656)	18.5535
Amotsangin A	Limonoids	Limonoids	1	1	1	138853	117400	113618	1	1	1	199016	195199	184600	1	1	1	143950	119705	113423	1	1	1	203946	181578	181110	225101	263454	287391	1	1	1	1	1	1	400467	439989	464323	(595.2855, 11733.4375)(596.28876, 2105.611)	14.993
Hirtin	Limonoids	Limonoids	2754051	1804018	1782800	2846777	2578549	2429741	1130378	1119590	1	1471486	1372221	1359438	805874	805652	839855	4166177	4055650	3768289	175053	228910	263276	3126115	2923205	1906351	3918038	599728	655503	1116406	1133592	1131829	808614	806394	791614	1479810	1618308	1739833	(597.0483, 55157.47)(598.38666, 23874.545)(599.2302, 4752.4277)(580.38165, 2892.218)(581.22614, 3082.4648)(584.2268, 368.57)(597.2281, 66424.84)(598.23114, 23173.596)(599.2295, 8079.2544)(600.23224, 533.3333)(579.2082, 9155.913)(580.21124, 1613.7965)(619.20966, 3654.9526)(620.2195, 462.39502)(601.49005, 18386.438)(602.7072, 5611.64)(605.2167, 4410.87)(607.2382, 1403.96)	8.91333
cedrelanolide	Limonoids	Limonoids	746142	545028	682491	325118	256207	267146	1433594	1470655	1422501	536438	533547	517743	493739	522143	539603	1	1	1	252095	286958	312425	316755	289112	287281	1	235959	248187	395142	293157	420678	505248	492758	462061	168499	240424	292078	(601.2684, 8695.265)(602.2746, 2950.51)(582.23413, 1702.7719)(601.26746, 23212.805)(602.27014, 6091.61)(603.2674, 1626.355)(584.25287, 3973.383)(585.26434, 1532.5834)(623.24567, 13020.647)(624.2483, 4512.181)(625.2629, 1627.054)(611.2382, 1692.68)	12.2554
Amooramide E	Limonoids	Limonoids	733900	659528	633635	1	1	1	1	1	1	127494	132228	126969	1322153	1385902	1449310	97021	90148	75139	886680	315835	345313	75034	1	1	996497	1127707	1179480	491244	484652	155239	373481	1	368257	70771	89025	105850	(614.9798, 29896.67)(615.9837, 9761.402)(616.8185, 2818.7483)(596.8208, 10007.291)(597.6172, 2416.2634)(637.6342, 3950.4602)(638.26984, 749.5614)(621.53595, 8772.059)(624.29034, 5136.9155)(625.293, 1825.3434)	15.3588
Amotsangin F	Limonoids	Limonoids	7512610	7194234	7234973	267182	244284	233317	1	382825	379803	9610066	9212784	9124197	367202	375281	404829	2094290	2030240	1900140	97954	116972	130859	446665	416559	381772	1405220	1584103	1707282	167254	190656	190321	134989	119251	117283	99618	110056	123977	(623.25195, 8492.642)(624.26196, 2547.761)(600.2354, 89761.31)(601.24023, 35263.055)(602.2498, 10579.457)(625.2564, 78944.99)(642.02936, 56234.22)(642.25055, 31772.12)(643.2553, 13854.088)(644.2579, 5503.1772)(627.1356, 15097.761)(628.23987, 4772.76)(629.2422, 1827.5591)	11.5042
ohchnolide B	Limonoids	Limonoids	11700000	11200000	11000000	242166	199066	1	7351136	7601793	7614656	1	1	1	9308836	9706829	10000000	245085	229301	223330	2533961	2753468	2898138	303262	268607	273519	1	1	1	2233991	2324267	2362101	17100000	16500000	16700000	647234	723949	723570	(624.2879, 1609.9935)(607.2918, 13769.934)(608.29486, 4133.0435)(625.303, 86742.0)(626.306, 33402.92)(627.30756, 6561.33)(607.29333, 176687.02)(608.29626, 69407.91)(609.2984, 14030.655)(610.3012, 1083.0701)(653.29803, 1392.3832)(629.27545, 7636.4844)(630.27936, 1061.5759)	21.3986
Amotsangin G	Limonoids	Limonoids	1319678	1207226	1200867	1	1	1	1399122	485439	1037636	149670	155368	1	5186126	5286800	5447684	1	1	1	2625511	2855253	3012087	1	1	1	1	1	1	803324	871734	880751	994178	978994	983644	1	1	1	(624.9997, 43202.164)(626.1284, 18007.35)(627.3091, 4102.905)(628.3113, 865.7166)(625.3029, 78960.625)(626.30597, 30442.521)(627.30756, 5763.5864)(668.5077, 4107.246)(671.3138, 3026.49)(652.617, 8674.543)	21.2136
1-O-Detigloyl-1-O-benzoylohchinolal	Limonoids	Limonoids	1	496579	506959	491252	437440	424524	604734	607041	1006408	115114	106459	112076	262855	275719	305680	1	1	1	4384902	369887	424309	568805	535663	530165	1	1	1	8519693	8616523	8889159	1506544	1410483	1424622	1	1	1	(636.284, 24342.873)(637.28845, 29501.607)(639.4529, 13646.962)(640.2865, 620.8034)(616.2486, 1133.45)(639.28314, 48655.52)(640.286, 18193.113)(641.288, 4118.478)(622.4218, 21921.52)(622.27496, 1868.0)(623.288, 71984.945)(657.677, 10562.387)(658.4345, 3480.7925)(659.2829, 475.348)(643.3862, 21974.723)(642.9257, 14573.17)(643.9241, 6768.762)(644.2585, 1514.914)	18.4829
Amooramide G	Limonoids	Limonoids	781642	690346	659764	188397	180943	180883	123141	133314	139902	267086	1	1	124522	130605	146190	1	1	1	113362	130037	151207	410114	392070	386460	1	1	1	1	1	1	193549	185728	181745	1	1	1	(637.95135, 4356.69)(639.2832, 2879.61)(621.2834, 942.6533)(635.2871, 7275.995)(636.29016, 1628.145)(623.27423, 5638.0796)(657.26166, 7109.331)(658.26605, 1678.2734)(641.2485, 21385.41)(641.5643, 9549.516)(643.3568, 12206.556)(644.2595, 3150.1855)	10.755
Amotsangin E	Limonoids	Limonoids	374938	347178	345460	1369188	89203	84477	1544167	1547080	1540620	1619145	1545001	1522478	519098	566381	598143	1081536	1045429	981148	365893	414921	436505	1540591	1405703	1360395	143085	198360	1	148553	129610	155500	1604910	705470	694451	287841	235424	243242	(638.2787, 347.27)(614.8216, 11841.805)(615.8118, 5929.2456)(616.2391, 745.07)(637.2667, 6646.0)(638.60724, 42641.848)(639.28314, 125225.67)(617.25775, 2046.7933)(616.2486, 710.195)(655.5383, 15762.298)(656.69104, 7559.828)(658.00397, 2356.7341)(640.52454, 8987.809)(641.78625, 8997.106)(641.38837, 3999.0073)(643.2667, 15863.61)	10.7747
ohchnolide A	Limonoids	Limonoids	615616	567041	539094	1238421	1089376	1004355	256989	265310	267328	687335	655135	653266	396188	422075	439743	245920	244660	234039	1231530	1349625	1361523	1625667	1451654	1459471	1	1	1	292569	295139	307743	588067	704497	746247	283550	328869	333792	(648.2796, 7093.6387)(648.2713, 3005.2266)(649.28595, 3394.1301)(650.29, 808.13995)(628.371, 31483.232)(629.2763, 6754.909)(630.2793, 1145.3163)(671.8681, 2312.075)(674.2825, 1045.8433)(654.26105, 6177.324)(655.44635, 3714.2087)(656.6728, 8045.596)(656.2693, 9274.22)(657.2776, 5006.6)	9.64966
Amooramide A	Limonoids	Limonoids	163635	157970	157507	624760	524259	508505	261498	97717	254345	236197	226178	219124	218040	248945	262680	340676	330717	315650	286997	307281	341318	197797	187710	176506	1	1	1	97149	97683	104263	359336	332866	320911	1	1	1	(649.2869, 17563.334)(650.2902, 4830.9937)(653.03424, 12793.002)(654.28674, 3734.5217)(655.2872, 873.1825)(674.4889, 4176.2827)(675.02814, 1597.2041)(654.5969, 12689.614)(655.7229, 5408.7466)(657.2747, 3713.46)	15.5798
Amooramide D	Limonoids	Limonoids	3031909	2857184	2818237	971560	893602	841662	5038321	5214623	5149384	123816	117346	104854	11700000	11900000	12200000	1	1	1	4063589	4392017	4590802	1	1	1	1	1	1	12800000	12700000	12900000	4587476	4483442	4515924	1	1	1	(653.2966, 1128.2799)(615.3328, 802.5467)(628.3113, 747.82)(636.8055, 48622.363)(637.76276, 17597.06)(639.3057, 5039.573)	20.5549
1-O-Detigloyl-1-O-cinnamoylohchinolal	Limonoids	Limonoids	343124	719184	691794	1137155	981016	943882	415169	421230	432212	3334299	3217057	3144637	145442	137348	175721	650135	641077	596888	178797	184126	189369	1057887	969509	957041	1	238271	258474	199036	210465	203455	1	1	1	486503	547519	591721	(660.29175, 13303.582)(661.29486, 1081.875)(645.2732, 1220.62)(686.9871, 12643.729)(687.9906, 5424.4873)(689.2399, 1794.8517)(689.3043, 3145.94)(666.2707, 2756.095)(667.27594, 676.09)	12.4046
Amooramide B	Limonoids	Limonoids	100414	288906	280152	458969	412224	388073	97143	92153	84200	121291	116456	113863	1	1	1	280461	257715	243797	167992	183394	192392	412961	376285	368689	1	1	1	1	1	1	211506	1051172	189990	398745	466759	498194	(662.9649, 7279.91)(664.30536, 2198.455)(644.9857, 6009.871)(646.70654, 1265.0371)(663.3004, 5535.45)(664.3047, 1259.26)(649.2865, 6738.71)(650.2899, 1693.31)(686.32983, 10420.325)(687.33246, 3732.7385)(688.7238, 1499.8629)(671.2748, 8233.715)(668.2746, 5441.2036)	8.26897
1-O-Deacetyl-1-O-tigloylohchinolide B	Limonoids	Limonoids	359062	329247	321981	327794	1	281943	282675	295475	297112	144549	139927	138560	778882	804703	812650	207746	207259	194971	150901	170150	172887	120807	116438	106397	446745	497615	529316	217880	232213	237861	1512241	1503161	1467310	1588014	1746647	1829935	(669.333, 29216.828)(670.33624, 9870.987)(669.3323, 25377.225)(670.33594, 8133.436)(671.3392, 1699.73)(691.3151, 27318.314)(692.3182, 9149.831)(693.32086, 1745.5632)(670.3103, 15717.997)(671.3133, 4780.266)(672.3136, 1254.1411)	21.8735
Nimbolidin C	Limonoids	Limonoids	5168462	4845340	4757746	1293474	1200384	1123309	1640692	1713633	1700252	4588145	4533648	4445766	778882	739301	812650	4129000	3892277	3816646	3048115	3337465	3552407	5528339	5073396	4875753	1210134	1323956	1398932	497825	540828	545575	3841201	3821674	3733452	4357129	4790036	5067939	(669.4361, 40275.73)(670.4391, 14106.089)(671.4887, 2482.3516)(669.3334, 37058.637)(670.3365, 12959.075)(671.3396, 2454.1)(691.3154, 38110.53)(692.3186, 13312.358)(693.32117, 2642.562)	20.5792
1-cinnamoyl-3,11-dihydroxymeliacarpin	Limonoids	Limonoids	415577	346311	303596	175812	166648	160948	167658	160687	172143	1	1	1	488926	511973	559373	1	1	1	1	1	1	1	1	1	1	1	1	1	1	1	1	1	1	1	1	1	(682.5919, 12687.081)(683.5949, 2492.286)(687.29443, 19492.22)(688.29614, 8519.536)(689.3044, 3444.9932)(709.27655, 12744.68)(710.2796, 4907.6367)(711.2797, 1826.0299)	5.96542
1-O-Deacetyl-1-O-benzoylohchinolide B	Limonoids	Limonoids	1	1798287	1753572	588429	507824	476658	1	1	1	419728	405152	403429	1	1	1	1315085	1294265	1215928	1	1	1	1676438	1562906	1499206	1	1	1	1	1	1	1	1	1	2402644	2887302	3243463	(687.2928, 48146.543)(688.2956, 19353.527)(689.2987, 4567.552)(690.3117, 389.68)(711.2837, 4293.03)	9.715
Amooramide C	Limonoids	Limonoids	500089	472576	457051	1	1	1	181808	194577	193530	572105	569044	543809	289345	300383	318306	428499	401287	383276	204691	219146	244800	601491	548054	515337	130277	156377	156922	1	1	1	153745	151173	158044	494019	543039	579962	(692.42914, 20705.428)(693.4317, 3700.5579)(677.7962, 8736.179)(677.2991, 4494.4966)(678.3106, 5896.1304)(680.2984, 373.745)	18.1328
Nimbolidin B	Limonoids	Limonoids	1	1	1	1	1	1	1	1	761627	140978	127144	119030	2318866	2434446	931500	1	1	1	1135441	1245751	1348281	1	1	1	1	1	1	404960	410695	437660	1431322	1408153	1409825	1	1	1	(699.3578, 43518.082)(700.36115, 14513.209)(701.3643, 3819.1355)	14.803
Azadiractin B	Limonoids	Limonoids	98631	85261	78027	1150684	1065890	1012275	278278	303775	299583	1149613	1149696	1129004	267255	252501	266186	1435825	1447283	1376122	269455	281943	303449	438611	435423	415317	273645	314402	350342	214494	206133	211001	464374	438418	442890	677792	759088	792260	(702.2346, 20948.07)(703.2343, 8359.34)(704.2324, 1201.7474)	25.113
1-O-Deacetyl-1-O-tigloylohchinolide A	Limonoids	Limonoids	359062	1798287	1753572	588429	507824	476658	282675	295475	297112	419728	405152	403429	778882	804703	812650	1315085	1294265	1215928	150901	170150	172887	1676438	1562906	1499206	943431	1035193	1089760	379836	409745	406530	2836378	2820873	2749507	2402644	2887302	3243463	(711.2837, 4293.03)(670.3101, 14347.598)(671.31335, 4468.888)(672.3135, 517.395)(688.68524, 40280.99)(689.68805, 15615.125)(689.2987, 4567.552)(690.3117, 389.68)(693.29297, 2858.7217)	15.9989
Nimbolidin A	Limonoids	Limonoids	259841	208693	202518	1	1	1	1	1	1	1	1	1	1	1	1	1	1	1	143440	170161	168334	1	1	1	1	1	1	1	1	1	1	1	1	1	1	1	(720.3095, 8816.687)(721.3125, 794.9733)(702.2972, 8258.124)(703.3001, 1233.86)(748.3023, 318.79)	5.59309
Nimbolidin F	Limonoids	Limonoids	771297	718189	697144	1	1	1	215730	214063	224217	1	1	1	1	1	1	1	1	1	1	1	1	1	1	1	1	1	1	1	1	1	340498	338814	325123	1	1	1	(723.39526, 19905.67)(724.39825, 6511.633)(725.3996, 201.18)(763.38837, 18187.502)(764.3916, 6597.9263)(745.3405, 10516.637)(746.34357, 3214.9465)	7.161
Nimbolidin E	Limonoids	Limonoids	1	1	1	1	1	1	1	1	1	1	1	1	1	1	1	1	1	1	1	83932	83429	1	1	1	1	1	1	1	94624	90638	1	1	1	1	1	1	(749.37915, 5440.0273)(750.3834, 769.4425)	16.215
Nimbolidin D	Limonoids	Limonoids	1	1	1	1	1	1	1	1	1	4706191	4561692	4586993	1	1	1	757372	708834	708615	1	1	1	1	1	1	1	1	1	1	1	1	1	1	1	1	1	1	(780.40314, 25180.844)(781.40643, 8638.087)(782.4084, 1393.1699)(802.4043, 183770.3)(803.4074, 82393.555)(804.40967, 21827.389)(805.4121, 3311.4968)(785.35834, 15620.703)(786.3615, 4448.913)(787.36346, 541.9733)	19.4328
Amooramide F	Limonoids	Limonoids	145726	1	1	1	1	1	1	1	1	1	1	1	111543	1	127815	421338	711172	368612	1	1	1	1	1	1	1	1	1	1	1	1	1	1	1	1	1	1	(782.8516, 9786.856)(783.8548, 2689.34)	17.9975
1,4-Naphtoquinone	Other polyphenols	Naphtoquinones	114042	140816	117451	1	1	1	1	1	1	278587	1	1	1	321485	1	233670	1	1	1	1	1	150399	122413	1	224120	1	284859	1	1	328423	389065	363843	353579	1	1	1	(140.67122, 20241.215)(144.03804, 3122.4797)(143.54121, 711.0925)(184.63373, 2384.3718)	1.408
Juglone	Other polyphenols	Naphtoquinones	304334	1	265338	645391	604341	1190485	405374	427797	428360	958730	906356	857506	2551962	2620284	2697349	390812	366347	355581	152705	163987	168301	267004	229001	211946	939878	1080881	1151799	1497787	1497934	1506906	762650	791348	734319	1	1	1	(175.03802, 36920.03)(176.1886, 6277.024)(177.03575, 20098.719)(178.03764, 3497.0725)(179.04858, 1902.543)(158.02258, 21871.672)(159.47867, 8280.591)(160.36621, 6133.035)(161.0305, 4869.783)(175.03944, 38015.34)(176.0409, 4929.2993)(198.31506, 2971.57)	2.05486
Catechol	Other polyphenols	Other polyphenols	2563835	1468096	2213256	341255	1	1	2110204	2204546	2236205	377028	362280	268602	1	1	1	1	1	1	1	609549	634277	741411	1	1	1	1	1	1817162	1810029	1882576	1	548708	1057220	1	1	1	(110.03696, 1080.6656)(111.04509, 8236.843)(112.045715, 398.28665)(133.69649, 1560.0077)	3.36533
Pyrogallol	Other polyphenols	Other polyphenols	3099160	2216979	1194113	1236813	1	1155249	9133529	9681291	9324525	6927426	6364512	6333879	4893369	5303131	5727768	6316637	6006152	5861499	4407006	4765008	4927199	1	2230511	2128886	1846079	2055158	2828420	6137683	6038287	6077683	4783677	4637543	4579387	2267673	2300306	2615829	(126.031944, 3620.9888)(113.03524, 534.6067)(127.04, 68862.164)(128.04356, 3576.3877)(129.05536, 79.28)(109.02924, 11766.45)(110.03393, 2100.71)(150.42671, 26480.215)(150.02756, 2887.6387)(136.0259, 79.55)	7.01075
3,4-Dihydroxyphenylglycol	Other polyphenols	Other polyphenols	7556217	6846862	6784605	7837425	7178401	6819728	1228463	995662	4042194	1636865	1989924	1517660	3562302	578651	600184	1063866	942955	890647	980204	1040343	1132611	3216817	593675	532619	1327269	1465499	1585009	2144060	2196824	2275349	3302944	3232501	3981926	3396243	3686897	3898646	(170.63834, 5950.301)(172.61896, 1510.979)(153.94565, 23885.54)(154.94113, 3441.949)(171.51895, 39101.664)(172.59288, 4067.0833)(173.0731, 257.08)(153.27834, 8390.757)(154.05664, 995.82666)(193.30061, 3780.1826)(195.5531, 2218.8474)(197.05591, 943.54004)(198.0621, 6760.31)(175.35567, 17427.156)(176.0395, 2742.4812)	3.48728
Coumestrol	Other polyphenols	Other polyphenols	1	1	1	230453	201350	203966	344603	554353	359881	1	1	1	1	317851	327135	1	1	1	1	1	1	305271	272175	264637	1	223825	1	507812	531215	551901	1	1	1	1	1	1	(271.33142, 10302.4375)(270.0485, 767.43)(253.0326, 3969.245)(252.28816, 15398.148)(253.04005, 7347.5024)(254.03766, 5903.2275)(291.0182, 8983.544)(292.01968, 2223.2742)	2.74481
Arbutin	Other polyphenols	Other polyphenols	513028	143450	458419	1198401	1062934	1001186	1567110	1587985	1615018	451673	415766	424262	1151649	1123051	1167080	305769	300616	280232	493695	528883	544544	805725	736935	696434	574412	636519	658285	968982	951999	964601	1572259	1537164	539260	104727	133660	153548	(273.39047, 22182.455)(274.09204, 4905.9272)(276.29968, 760.176)(277.1039, 1295.19)(255.4139, 5733.08)(257.0858, 1485.23)(275.53387, 2855.5872)(276.1099, 909.02)(257.596, 857.17615)(259.09, 498.15332)(295.27228, 11993.986)(296.2662, 2236.2717)(278.14484, 4325.611)	5.62914
Phlorin	Other polyphenols	Other polyphenols	4521940	3752069	4193394	683894	583219	586966	342455	340846	341573	197457	180032	177433	362896	513107	381092	1054274	1030992	1060575	1086370	1448220	1710132	785072	695720	638776	470493	531556	591384	894184	892662	918518	2083648	2079192	2053008	289617	307531	324299	(288.5855, 14132.641)(290.4667, 4186.0654)(291.68848, 2613.84)(272.02222, 3491.6873)(271.5068, 492.1971)(289.44913, 29921.514)(290.49484, 3230.4685)(291.08868, 1806.4775)(273.5887, 2861.4038)(274.64816, 1293.2955)(313.27405, 5026.6143)(316.09058, 2506.795)(293.93723, 3491.044)(294.0756, 332.61)	3.0005
Thymol	Other polyphenols	Phenolic terpenes	2558765	1	2023716	1678454	1536788	1	1	850985	1049043	4331445	4010926	3945662	809267	848320	886837	972082	1015912	947035	3968183	4197042	1	1839780	1784947	1602137	850279	960366	820254	1525290	597749	1465459	6642248	6447824	6313093	938187	1020426	1062319	(137.1079, 136.04001)(151.11238, 14326.945)(152.11565, 2277.4114)(133.1023, 72313.83)(134.10527, 6844.34)(173.09634, 1214.51)(158.8935, 7789.677)(159.09671, 5611.265)	8.27964
Carvacrol	Other polyphenols	Phenolic terpenes	2558765	1	2023716	1678454	1536788	1363526	1	850985	1049043	4331445	4010926	3945662	809267	848320	886837	972082	1015912	947035	3968183	4197042	4315643	1839780	1784947	1602137	850279	960366	820254	1525290	597749	1465459	6642248	6447824	6313093	938187	1020426	1062319	(137.1079, 136.04001)(151.1124, 13740.346)(152.11565, 2277.4114)(133.10231, 74452.72)(134.1053, 7045.0127)(174.09666, 1356.9501)(158.8935, 7789.677)(159.09671, 5611.265)	8.27216
Carnosol	Other polyphenols	Phenolic terpenes	399009	1393741	1265965	351672	1	1	4726751	168031	1142888	664710	661363	642784	806359	397181	396740	1	1	1	1	2109544	4148624	764651	696003	685317	170362	195624	203292	1	6015504	3079406	1116450	1116168	874869	199349	206227	214637	(330.8919, 13178.303)(332.1908, 3259.175)(333.1976, 707.07)(313.09537, 2645.7893)(314.1815, 77.64)(331.19373, 10673.561)(332.20026, 1068.138)(313.93478, 11072.065)(314.61603, 3953.5156)(316.19156, 1000.4034)(354.9317, 1383.4275)(339.1791, 1798.69)	14.3316
Carnosic acid	Other polyphenols	Phenolic terpenes	1250654	1987149	827028	452659	444962	1390179	667487	776213	615869	640502	618854	597284	499763	474487	494460	1	177700	166698	6823269	6492530	6436097	2070179	1880036	1854445	1	592601	798224	1551325	2927015	1	5108212	5044920	5061274	1733090	1873770	4509266	(332.2831, 3137.5334)(314.3129, 10206.58)(315.2001, 5723.79)(333.3183, 29410.762)(334.6417, 10989.827)(315.19458, 45007.273)(316.19772, 10230.284)(356.91577, 3029.7874)(358.20605, 333.35)(337.8494, 3921.295)(338.18283, 155.55)	14.0301
Rosmadial	Other polyphenols	Phenolic terpenes	1	1030085	1024590	1274322	1158186	1086901	1544459	1581248	1613366	882582	858218	1253331	4010930	3861154	4305115	1	1	1	4322710	4708130	4961827	4757042	4357279	4176951	991314	1099411	1145342	576670	553392	534223	8846786	8702837	8514013	15900000	17200000	18000000	(345.12054, 3823.0562)(345.14444, 720.81665)(326.7642, 1255.584)(347.73227, 4518.071)(346.17218, 2687.6821)(328.94855, 1502.4187)(330.41135, 536.375)(367.1834, 77028.336)(368.31442, 14818.338)(369.1559, 4243.7573)(349.30588, 18439.975)(351.0553, 2696.419)(352.484, 1007.82)	4.37228
Epirosmanol	Other polyphenols	Phenolic terpenes	1868901	1746359	1706278	465353	438942	423893	576825	1	597590	440682	431952	418412	1387160	1390612	398443	1	1	1	1168931	2174008	1	524394	481829	337380	575912	1	717490	1	2367775	1169411	348637	496961	4260184	106129	145051	170084	(347.95178, 6197.1084)(349.4361, 4322.645)(328.17572, 2321.1602)(329.1788, 1209.28)(347.58423, 8377.584)(348.18942, 1258.405)(349.1969, 83.66)(329.6776, 10554.741)(330.67767, 1918.2773)(371.05228, 2727.2263)(372.6318, 2647.7712)(373.5175, 5838.4004)(374.18658, 1021.875)(352.04156, 6634.8433)(353.36475, 1634.857)	9.50722
Rosmanol	Other polyphenols	Phenolic terpenes	1868901	1746359	1706278	465353	438942	423893	1	1	1	440682	431952	418412	1387160	1390612	1	1	1	1	1168931	2174008	1	524394	481829	337380	1	1	1	1	2367775	1169411	1	1	1	106129	145051	170084	(347.96097, 3660.0208)(350.18796, 4528.6704)(328.17593, 538.05)(347.68463, 7794.9336)(348.1903, 1524.375)(329.17606, 10862.008)(330.1768, 2492.7651)(371.29065, 1331.2828)(372.73248, 2473.951)(373.5175, 5838.4004)(374.18658, 1021.875)(352.25055, 8959.668)(353.49844, 1741.0634)	11.0147
4-Ethylguaiacol	Other polyphenols	Alkylmethoxyphenols	2389381	2731928	1	655976	1	583187	561121	597850	485199	1263310	1242017	1194220	593244	431560	641260	5068335	1770074	1747436	1957427	2099418	1965588	310552	3472441	271141	169148	199487	204913	626614	654892	1072290	1283204	1268974	1237712	438381	479920	480752	(152.23386, 33430.246)(153.08228, 2617.347)(154.0867, 94.21)(136.075, 5850.874)(154.71756, 6149.311)(154.09479, 1576.3966)(136.24687, 184246.53)(137.52621, 24455.107)(140.09833, 6484.7773)(176.67163, 19774.13)(176.07962, 4360.5967)(159.78328, 1681.0186)(161.40718, 714.8333)(162.07745, 2153.8)	7.46283
4-Vinylguaiacol	Other polyphenols	Alkylmethoxyphenols	108000000	100000000	99700000	14800000	13700000	12800000	3803398	11400000	3674019	13800000	12300000	12200000	7106588	7403367	7315996	35900000	34900000	33800000	14200000	15500000	16600000	43100000	38600000	36000000	5366085	5991644	6364021	10700000	10500000	11300000	14500000	1	13900000	4484779	4988680	5227523	(153.461, 1857.1263)(132.30502, 3325.035)(151.0765, 557771.94)(152.07935, 54123.336)(153.08244, 5577.5225)(134.87082, 10323.87)(134.06421, 1510.046)(174.30978, 1669.1769)(175.56236, 1527.5465)(177.06685, 482.55334)(156.47913, 28609.562)(158.05412, 4424.842)	2.85789
4-Vinylsyringol	Other polyphenols	Alkylmethoxyphenols	7649695	6934396	6772194	3933388	3479582	3272632	753831	307236	239182	814598	772254	773398	1608708	683201	847067	204615	201099	193443	142867	4659013	1	9343695	8616921	8230908	105035	125263	129537	439730	476946	444255	2518038	5613737	5690326	1010561	1036974	1107651	(245.40617, 2686.8086)(246.85625, 2742.8726)(247.11, 3599.42)(225.62599, 7388.829)(227.89478, 3463.39)(245.18999, 70440.5)(245.10709, 20055.816)(245.10986, 3474.1067)(227.48474, 18028.762)(229.68585, 1625.1141)(229.43343, 2523.5566)(230.10275, 1828.8)(266.47528, 10238.152)(267.69366, 3636.7734)(250.4172, 30175.227)(248.07747, 5145.622)	6.87239
4-Ethylphenol	Other polyphenols	Alkylphenols	7651763	6821306	7281095	5682002	4697067	4187917	33700000	34400000	34900000	1762074	1591847	1554631	54100000	59900000	62600000	11000000	22500000	20700000	41300000	46200000	50200000	7185209	5675718	4895681	900409	1087735	1207529	3355893	3434647	3469581	160000000	153000000	146000000	3090514	3792936	4217744	(123.72762, 5407.482)(104.06011, 6335.5093)(125.088554, 8123.613)(127.0954, 1229.14)(105.0709, 847905.5)(106.074066, 73815.5)(107.078735, 7422.4937)(146.06163, 7928.6665)(129.05562, 1666.1974)(130.06462, 1661.7224)	3.692
4-Vinylphenol	Other polyphenols	Alkylphenols	1295427	3580260	5336527	44900000	41800000	39000000	2357369	1967197	2134183	69900000	64700000	64100000	612043	3751532	4263720	5579361	5645144	5326980	1508788	22600000	24200000	112000000	96400000	86600000	18100000	20100000	22400000	42100000	42200000	44800000	37800000	36900000	36300000	21000000	24000000	25200000	(124.186584, 2819.3545)(102.61209, 2679.6814)(121.06583, 891476.2)(122.068954, 71800.4)(123.071945, 5074.3555)(103.055084, 64947.145)(104.0591, 6373.8687)(105.05565, 262.68)(144.78592, 7875.1206)(145.33783, 13202.798)(148.06076, 1309.6034)(127.04044, 23516.832)(129.68643, 111124.15)(130.05122, 116801.11)	2.96283
4-Methylcatechol	Other polyphenols	Alkylphenols	3216403	9704902	2005276	1	1048919	2203765	1995523	2380552	2328328	1	2580761	1	3756371	4069577	4183875	2894472	2314881	2288835	9004859	1	1	7950641	7243136	6802800	532401	601244	1	4768288	4888624	4927773	7535883	7205392	1	1	1	1	(127.05958, 5027.3433)(129.0663, 999.155)(107.0447, 13043.04)(125.47124, 8182.164)(126.60461, 888.1463)(107.22412, 14508.667)(108.04912, 1189.407)(147.0449, 71283.484)(148.04784, 9879.329)(149.05116, 641.6667)(133.33035, 6109.996)	3.43623
5-Pentadecylresorcinol	Other polyphenols	Alkylphenols	876909	825165	814492	1	373455	356574	1886537	1975620	1932026	11200000	4548513	10800000	503884	523944	523542	2850066	1	1	1803847	1897703	2034055	17400000	15900000	15300000	454869	501369	539496	1275568	1294685	1332708	2610484	2571570	2535255	1492487	1066641	1146997	(322.39246, 4601.8955)(323.27383, 999.70337)(324.28995, 2760.4033)(302.26712, 1253.1589)(323.28244, 25611.67)(325.29163, 15255.125)(326.29645, 372.195)(308.2798, 2271.774)(343.98425, 12277.407)(345.7617, 5663.0522)(326.629, 25732.9)(326.25354, 7700.7676)(327.2591, 818.255)	15.7456
5-Heptadecylresorcinol	Other polyphenols	Alkylphenols	3562575	1	1	2213820	2060817	1998866	1852397	4415875	1	10900000	10500000	10500000	1477396	1567261	1564286	7963213	7680508	7398466	2942303	3130283	3205113	695083	632243	624371	502841	583072	619653	4143932	4058137	4180749	1629992	1096711	1106155	5264303	5566639	5922613	(350.83182, 3145.141)(353.3163, 1990.114)(331.11383, 7238.037)(331.61996, 2904.0635)(352.32144, 5403.6475)(353.32208, 2643.466)(336.3108, 894.72)(373.29956, 10171.315)(374.2443, 2770.8328)(355.99194, 5244.0347)(356.28635, 2018.294)(357.2993, 734.65753)	18.4581
5-Nonadecylresorcinol	Other polyphenols	Alkylphenols	13300000	12500000	12200000	3200880	407194	395769	114852	299297	299402	172191	12700000	12400000	117636	126196	127809	10800000	10200000	10000000	438036	224916	228451	7801026	7272467	7079762	14000000	14600000	15300000	175880	149134	169729	164375	8224787	7954778	1	1	17400000	(377.09094, 9729.721)(378.62827, 1467.127)(381.3514, 835.03)(359.2649, 77807.89)(360.3199, 17060.08)(361.3224, 1555.6716)(362.34143, 554.42)(362.342, 7219.05)(363.3452, 1115.01)(399.71176, 6669.5312)(400.32507, 1291.3844)(383.3108, 583.13)(385.3306, 1159.81)	17.5309
5-Nonadecenylresorcinol	Other polyphenols	Alkylphenols	577471	528112	543866	1	1	1	445355	484296	463056	347541	362213	662409	275376	312056	324234	414088	406009	403179	797636	832096	876993	150419	1	1	490736	525424	553711	319836	312220	326257	541700	521656	389141	145436	1	175446	(377.5746, 3328.8918)(377.90164, 794.59283)(379.33322, 129.43333)(357.24454, 3877.2373)(358.319, 2016.737)(380.22522, 5272.901)(359.32004, 3114.4336)(360.32776, 386.76248)(397.83206, 11353.613)(398.92502, 3402.4255)(379.82333, 5485.3345)(381.30765, 1592.39)(383.3042, 129.76)	17.7284
5-Heneicosenylresorcinol	Other polyphenols	Alkylphenols	851920	786888	750939	370011	340256	322148	977004	622613	628752	1080791	1066582	1057672	627242	680269	692452	199469	194021	194890	1653465	1682338	1706598	240945	238321	211830	126413	150269	160567	309559	303736	314493	803479	697382	747238	209706	238968	234194	(402.57898, 14157.478)(403.69467, 3230.3652)(407.35355, 6608.9346)(408.356, 229.82)(385.3415, 9580.754)(386.34216, 1073.8733)(403.35724, 14042.1875)(404.36133, 1871.4624)(386.2642, 14645.359)(386.34772, 4555.6274)(427.65802, 9037.397)(427.8514, 2560.295)(427.3515, 416.43)(409.53836, 10169.706)(410.52917, 3221.861)(409.32724, 944.9733)	20.6134
5-Heneicosylresorcinol	Other polyphenols	Alkylphenols	1758875	1827659	1606664	523849	463422	446301	1316974	1365876	1062570	364481	340034	332733	685028	694337	703572	286720	249943	256798	683216	899571	747597	266531	752337	705036	212727	223611	254563	598401	1271996	653879	1291180	1643991	1622471	892965	1046952	1068109	(406.53873, 13237.931)(407.97543, 3277.566)(391.7066, 2140.29)(405.37378, 31269.828)(406.37753, 7545.2617)(407.37708, 602.44)(392.38867, 1314.96)(427.5405, 25104.713)(428.5846, 8090.8247)(429.83157, 1750.9655)(409.94864, 4569.0713)(411.01547, 2061.7354)(415.3558, 2269.84)	21.4128
5-Tricosenylresorcinol	Other polyphenols	Alkylphenols	1105540	1027805	1033527	1924723	1802926	1703290	2730341	1445513	2926166	1934295	1915133	1858295	1028212	1049390	1112746	5261875	5092218	4919938	1777921	1972118	1959205	4622957	4387803	4219033	1801488	1963618	2065994	1457016	1443647	1457407	4464735	4329098	4272319	2806432	3219021	3322933	(431.71518, 11391.905)(431.37924, 4028.856)(412.36755, 15247.766)(413.37103, 15019.734)(414.37506, 268.62)(431.38486, 1181.4733)(413.37823, 52844.586)(414.38235, 15905.448)(415.38474, 1545.2435)(458.7168, 5394.1304)(436.69458, 10213.712)(436.3582, 7310.0757)(437.35596, 960.585)	24.4077
5-Tricosylresorcinol	Other polyphenols	Alkylphenols	521348	499760	488954	1203391	1109750	1025355	324736	346390	339544	1	1	1	635505	657623	669519	285495	268621	267973	567675	602748	604076	1	1	1	253099	301442	322061	584312	581385	599614	608262	621592	604137	1	1	1	(432.81396, 6163.2944)(433.3854, 3318.5432)(414.38428, 14232.5)(415.38483, 1212.095)(461.39536, 3347.14)(438.6051, 11101.499)(440.01254, 3120.388)	19.5873
5-Pentacosenylresorcinol	Other polyphenols	Alkylphenols	755705	723366	3998518	1218909	1131691	1050270	5477470	4708149	5529431	930164	198495	882312	792707	850144	840808	353827	350646	327177	2986123	3057516	3168401	307707	1	174902	1	979184	1063054	2860682	2882706	2977465	3669871	11900000	3631021	801675	1	1048723	(460.6684, 12219.1455)(461.41693, 16301.395)(462.41815, 1660.7849)(440.3973, 2233.064)(462.08878, 15225.876)(463.42398, 6217.6265)(462.4188, 854.50665)(482.44077, 9984.983)(483.3616, 2400.788)(484.4053, 957.07)(463.42944, 51328.21)(464.38266, 15850.192)(465.3868, 3332.7842)(466.39075, 258.43668)	21.104
5-Pentacosylresorcinol	Other polyphenols	Alkylphenols	1163435	1037010	1064128	1	1	1	1491964	1546144	1502541	1971133	1955904	1874684	443961	435150	432171	1	1	1	1	1	1	1	1	1	195047	245402	337908	1	1	1	1082268	1044849	1016740	104714	118598	122800	(461.5309, 20173.39)(462.6441, 8486.66)(462.84927, 1142.3785)(484.18384, 3046.6187)(485.16385, 1054.9725)(466.22256, 7035.062)(466.40878, 2749.9114)	21.6359
Bisdemethoxycurcumin	Other polyphenols	Curcuminoids	11800000	11200000	11000000	1357608	1257796	1203722	12900000	13100000	13000000	2144628	2100336	2051855	9075456	9376237	9597031	3259992	3057388	2976742	4138086	4430612	4633521	1441864	1319794	1250750	5740349	6430106	6666635	8039396	8172980	8055803	12900000	12900000	12900000	1680365	388894	2092309	(311.57138, 16299.657)(290.09387, 608.6967)(311.77054, 8316.257)(291.09946, 235556.47)(292.1025, 34887.555)(293.1041, 6893.2583)(334.3892, 2211.9172)(335.1142, 1144.2267)(336.1121, 260.38)(313.1439, 19018.617)(314.0876, 4487.3076)(315.0753, 188.34)	6.25044
Demethoxycurcumin	Other polyphenols	Curcuminoids	1947297	800060	932479	1467021	183920	185147	2051573	2133401	2142312	1	1	1	1	1	625709	786411	664240	715501	537610	556312	1	1	4182690	4098446	241561	256256	270797	378000	734343	730603	651372	642033	1071288	1	1	1	(339.21283, 45391.51)(340.56433, 8235.429)(341.1194, 1463.214)(342.1191, 797.7666)(343.1217, 325.88666)(320.61078, 10635.246)(322.82266, 2088.6843)(324.11523, 848.16504)(342.28976, 17079.846)(343.13992, 1328.7175)(344.13483, 8851.11)(321.11084, 16417.848)(322.11722, 2248.5671)(364.29825, 140265.33)(365.7515, 253436.3)(366.11002, 85324.41)(344.3768, 2534.966)(346.7777, 1424.3833)	3.81915
Tyrosol	Other polyphenols	Tyrosols	2492830	2377494	2232444	42000000	39300000	36900000	197000000	199000000	193000000	67200000	62800000	61900000	239000000	261000000	265000000	8477967	4835036	4795308	19000000	20400000	22000000	105000000	1484859	82200000	16800000	18600000	19900000	30200000	30600000	32100000	35800000	35100000	34400000	19200000	21800000	22900000	(140.67236, 20996.473)(142.65157, 5773.2554)(143.08293, 9254.06)(123.67875, 3009.253)(142.08684, 8398.299)(143.08247, 8268.29)(121.0659, 1904503.5)(122.069176, 159366.89)(123.07156, 10191.285)(162.56073, 15882.116)(163.06104, 5567.076)(164.0692, 212.87)(144.68681, 6976.3594)(145.05022, 15761.969)	2.5525
Hydroxytyrosol	Other polyphenols	Tyrosols	4915717	4630485	4710920	790431	790640	749065	21200000	20400000	21300000	2585540	2578951	2499781	189418	5185664	5589990	1877325	1784524	1740931	4941704	5359078	2187099	3822192	3612474	3265017	1425674	1544749	1412410	1097191	6473589	6739319	3033011	2917999	2771364	1008692	1149418	1226226	(156.06671, 2793.145)(157.0706, 714.42)(136.33965, 20759.518)(156.46043, 7927.4736)(156.6749, 1910.7639)(137.06067, 50002.44)(138.06305, 4530.913)(177.2498, 93834.06)(178.12572, 18149.176)(161.37926, 2860.3467)(164.058, 1122.08)	6.55131
p-HPEA-AC	Other polyphenols	Tyrosols	1	345824	360013	1007543	887874	844676	1564741	1860279	2630989	757468	726924	290457	721390	734123	792540	423311	388209	369132	735386	788564	663590	496709	458512	448748	519504	583982	562450	1317295	4677275	386203	453755	474234	466276	883975	984309	1019434	(181.0403, 11027.938)(183.08513, 3418.3975)(163.0686, 3364.4148)(182.09038, 7533.145)(182.08246, 946.83997)(163.42035, 30775.715)(164.3691, 2894.0447)(203.67273, 1331.255)(205.0685, 16778.52)(186.95096, 2538.6423)(187.0626, 8452.57)(190.0716, 2111.16)	8.9005
3,4-DHPEA-AC	Other polyphenols	Tyrosols	1	10500000	10400000	1526092	1393043	1319784	2626491	2946610	2898842	1858689	1781860	1747558	1361089	1379252	1486945	951658	900660	892223	1	2717219	794457	889057	793668	755724	3170229	3553677	3709917	5653720	5369091	5802308	2574544	2533157	2448993	3637658	3976349	4124322	(196.75731, 24447.787)(178.05923, 5685.02)(197.08247, 65885.445)(198.08493, 8862.654)(179.07141, 63410.72)(180.07452, 6788.4727)(181.0857, 258.5)(220.44936, 3028.725)(222.0768, 416.63)(202.2213, 3606.4285)	5.71
p-HPEA-EDA	Other polyphenols	Tyrosols	691534	625085	634583	3630413	3346923	3276221	1371689	1382225	1384226	1676510	1601870	1590513	475896	352237	480288	842005	833541	867880	1343438	1392732	773113	2006060	1901554	1827847	2474007	2723463	2836074	568736	704724	706669	563889	542333	536589	8200175	9754297	10000000	(305.84195, 3751.041)(307.14075, 4015.077)(286.45224, 25475.016)(288.12817, 9215.532)(305.63876, 75524.83)(306.64243, 12822.763)(307.812, 1562.0278)(287.61188, 38348.754)(288.23593, 7305.3184)(289.12057, 5016.1333)(328.87683, 2604.1272)(330.3339, 11693.037)(310.7002, 36560.89)(312.12024, 12719.879)	6.46033
Hydroxytyrosol 4-O-glucoside	Other polyphenols	Tyrosols	864337	1711439	1761565	1778939	1664801	1539867	1132258	1138758	1	1792353	1988359	1688698	710063	710210	734528	1	1	1	1690669	1827816	1879958	3675254	3401428	3334098	1360648	1543576	582715	398769	2491471	419114	1109434	1051316	421651	2362378	2581446	2688232	(317.319, 5155.1313)(319.50424, 3879.1802)(320.12262, 2333.2349)(298.9499, 30828.793)(300.03708, 5485.7236)(300.09647, 2375.9934)(317.6231, 6279.2524)(321.139, 184.69)(301.28598, 36408.55)(302.9251, 1567.2019)(339.1598, 44243.12)(340.29742, 9241.996)(341.542, 2017.7599)(322.81717, 2819.9844)	5.1487
3,4-DHPEA-EDA	Other polyphenols	Tyrosols	355584	1672380	3366597	934194	709645	687442	879438	757673	894642	1	1	1	928362	840994	1265337	5925986	288520	252505	184167	138867	157927	955829	884352	265051	136400	311842	344222	1351137	1466515	1498583	1404203	689173	1276085	1175885	1310183	997382	(322.90198, 9585.424)(324.00967, 6158.965)(325.143, 533.795)(303.28558, 6924.9473)(303.92545, 777.666)(324.3426, 13031.793)(325.14706, 5084.3867)(326.1521, 630.045)(303.80698, 10749.491)(305.12747, 2233.886)(307.1273, 1402.15)(344.79706, 121791.39)(345.87183, 288999.6)(346.79044, 128631.51)(347.79288, 21341.576)(348.12744, 6432.3203)(327.64062, 2178.3718)(328.11914, 2883.1301)(329.1242, 4790.07)	6.1583
Ligstroside-aglycone	Other polyphenols	Tyrosols	14700000	14100000	13900000	202849	161470	165294	878416	900133	904939	404487	391078	377215	348368	694368	736802	1250583	1183549	1150314	298837	316000	345437	192384	166843	13900000	1	1	1	1070768	249775	1005800	578691	567025	546007	527538	593021	2576834	(362.30234, 9378.286)(363.1283, 4274.84)(345.8317, 142331.78)(345.8226, 38045.152)(347.05423, 7486.0337)(348.33243, 2068.998)(349.1311, 807.55)(366.48718, 41159.527)(367.654, 10516.6455)(347.6372, 15239.513)(349.6416, 32855.98)(350.1432, 10151.25)(387.88477, 10416.083)(387.1353, 2987.78)(368.1172, 25623.031)(368.78552, 4950.7637)(371.1276, 3619.343)	7.43464
Oleuropein-aglycone	Other polyphenols	Tyrosols	2928327	2649264	462966	144927	251943	1	321421	522059	330932	1	1	1	171520	175032	186996	1	1	1	806889	893020	905872	1133348	151644	154318	1	1	1	451460	445742	481783	299765	287928	277756	1	1	1	(379.22687, 3572.479)(379.1505, 2379.3)(362.01617, 6387.256)(362.13525, 1794.3049)(364.1415, 412.74)(382.89975, 684.5775)(362.6384, 2748.6375)(384.4994, 8706.851)(385.11465, 2216.0076)	4.491
Oleoside 11-methylester	Other polyphenols	Tyrosols	2238946	2179214	2137089	1	1	1	697785	645355	786924	1591561	1565783	1446784	3517423	3699858	3770708	121000	115399	115492	671349	507589	748801	383905	344889	335522	1	1	1	1116931	1136931	1177022	1438712	1417341	1387575	713606	790920	875547	(407.14838, 1664.6062)(408.1372, 559.7266)(388.03604, 3695.3772)(389.79233, 626.32)(406.651, 4535.3735)(408.15588, 285.385)(389.1375, 24400.754)(390.1414, 4603.0215)(392.14462, 1477.0933)(428.92853, 26089.854)(429.46512, 7594.4004)(429.12802, 1512.7633)(409.11163, 26533.176)(410.1149, 4207.486)(411.11533, 1710.4542)	5.9338
Oleoside dimethylester	Other polyphenols	Tyrosols	793205	684661	2427406	1514203	1389389	1307628	1226369	1323814	1248275	950156	941499	884725	774311	792453	794575	390166	366774	368608	458318	507789	530947	987262	927470	1618760	653640	724921	1	1201448	1165762	1282099	1	273015	679560	1	240990	254739	(419.1537, 12962.462)(419.3606, 3008.9497)(402.68283, 5837.484)(403.4032, 1695.1738)(419.3218, 3267.3184)(403.6816, 2936.4353)(404.95346, 12584.456)(406.14954, 593.46497)(442.8093, 5217.7837)(445.1496, 2526.91)(423.3033, 12904.504)(424.3689, 2208.5288)(425.1431, 160.13)	6.00414
Ligstroside	Other polyphenols	Tyrosols	3352061	3227517	3099317	2230529	2041210	1969419	1	1	1	2497750	2184136	2295484	647129	727189	665486	181721	196183	169667	93354	95612	101531	3110558	3740449	3679218	558779	625591	678642	1	91525	91830	1	1	1	1	1	1	(507.56155, 8689.314)(508.4447, 3774.229)(509.5338, 346.06332)(526.2076, 2950.784)(508.1988, 81028.0)(509.2021, 22978.531)(510.20316, 5663.449)(551.1929, 4778.796)(550.1943, 2443.6067)(530.1805, 2232.95)	7.95137
Oleuropein	Other polyphenols	Tyrosols	514016	278088	468240	178278	146345	133523	1	1	1	1	1	1	169875	171780	193210	1	1	1	187484	202482	216177	188623	131419	143816	113151	122708	146309	1	1	1	2174763	2156805	2099113	97555	111529	124896	(523.6788, 4239.9624)(523.78845, 5083.412)(542.2035, 7089.11)(543.207, 374.54)(545.202, 30787.46)(546.2053, 8314.87)(547.193, 2574.05)(524.1967, 6953.885)(528.1877, 4116.71)(563.177, 21860.627)(564.1799, 5735.082)(565.1872, 2856.1099)(546.8814, 24618.031)(547.66785, 4772.813)(550.16315, 3482.0203)(551.1647, 326.19)	6.71118
Demethyloleuropein	Other polyphenols	Tyrosols	985558	919823	899194	646629	593839	556590	197861	201327	198661	545485	490208	642159	155814	156961	167312	916631	934645	544192	9844408	10400000	10800000	768560	701987	687915	2386807	1230788	1289567	228513	217115	235012	199818	126587	123952	913817	1014399	1652417	(527.4126, 14247.536)(529.17163, 4221.6245)(511.63678, 1725.1735)(532.18677, 907.08496)(511.1626, 1211.48)(549.36255, 60541.617)(550.4638, 20766.326)(551.17126, 11481.826)(552.1697, 2996.4033)(533.91113, 7074.0063)(535.169, 5387.6196)(536.16437, 3765.4033)	6.35483
Psoralen	Other polyphenols	Furanocoumarins	153611	125767	132703	235840	202740	218512	1	1	1	1	1	1	1	1	1	1	1	1	1	1	1	1	1	1	1	1	1	1	1	1	1	1	1	1	1	1	(171.03094, 12735.237)(188.03957, 5380.5464)	3.162
Bergapten	Other polyphenols	Furanocoumarins	1	1	1	1	1	1	205356	121189	1	1	1	1	106563	1	1	1	1	1	1	1	1	1	1	1	124597	188067	198395	301666	249283	289683	295203	290539	293127	71936	80926	85481	(218.61694, 26036.887)(219.05045, 4737.0996)(198.03105, 5890.9453)(201.44624, 119531.67)(203.4554, 107059.3)(204.05743, 10531.156)(242.18454, 19835.738)(242.71045, 9313.2705)(243.0466, 15157.58)(222.021, 213690.77)(223.0237, 12470.697)(225.03253, 4084.2488)	2.077
Isopimpinellin	Other polyphenols	Furanocoumarins	952566	1079947	1062153	1	1	1	1	1	1	1	1	1	1	1	1	1	1	1	1	1	1	305271	272175	264637	1	1	1	234856	217323	225324	1	1	1	1	1	1	(249.06459, 4116.803)(251.07164, 8849.794)(231.04953, 2626.9302)(233.0562, 3298.4502)(229.55295, 2105.6)(231.0603, 4680.83)(233.0598, 2738.68)(271.046, 14716.762)(272.0485, 1905.975)(252.0404, 2565.97)(253.0413, 288.49)	5.09218
4-Hydroxybenzaldehyde	Other polyphenols	Hydroxybenzaldehydes	1463599	1375492	1351433	1519166	1265346	1160084	1935794	2021524	2039603	1271250	1175950	1136593	2187782	2382956	2499452	1151669	1054204	302571	2250888	2534218	2702809	194904	157643	117685	1935255	2268849	2424964	3583941	3494390	3720337	1772827	1682131	1617225	2435942	2890797	3169110	(123.041, 11758.5)(124.041176, 1943.8524)(123.04509, 15785.095)(105.03458, 53043.95)(106.03791, 3667.985)(107.0467, 215.26)(146.0274, 214.41)(129.023, 130132.17)(130.0267, 6538.2573)	5.23444
p-Anisaldehyde	Other polyphenols	Hydroxybenzaldehydes	5307174	1377486	4659697	3787963	3446262	2882012	3024134	3477574	3097561	1609570	1572401	1492300	861949	1127195	945491	3218979	3193813	3818624	1785909	1971641	2084714	4834529	4473502	4239506	1318486	1475854	1602864	994518	1026747	1003274	2653605	2546105	2452422	1008700	1149203	1223944	(136.23566, 11866.735)(141.0644, 798.49)(123.0543, 27914.9)(137.06062, 46547.535)(138.06303, 3976.3738)(119.04996, 11559.609)(120.05498, 2220.5242)(161.54738, 3749.5024)(142.35005, 3439.9275)(143.03685, 177.59)	5.60153
Protocatechuic aldehyde	Other polyphenols	Hydroxybenzaldehydes	2038195	6178191	5347974	7518090	9526593	8906618	4239991	4850656	4857305	6705917	6340286	8660855	2008349	2126603	2176961	3092332	2019618	1962441	1799399	1977009	2062224	8466797	7409523	7021894	3673430	4078227	4348057	1141153	1100069	1418096	4762551	4628260	4435131	2276023	2516778	2716493	(142.0448, 1303.505)(139.04001, 112597.39)(140.04443, 8617.416)(141.05554, 306.75226)(121.02939, 4983.0938)(122.03043, 1187.3168)(146.95493, 3216.3064)(147.0247, 7040.92)	5.22108
Vanillin	Other polyphenols	Hydroxybenzaldehydes	507195	458616	439247	2195112	1944997	1243862	932518	789493	959413	883818	972540	902108	2809363	2886404	1910846	400585	376190	365334	940672	1023534	1085090	270303	228688	211946	958470	1308202	1171185	605371	5498219	627314	436980	416874	652505	139704	155688	161521	(153.55132, 40720.68)(155.05397, 4890.3726)(136.04208, 3046.07)(153.05525, 14443.44)(154.05734, 913.06586)(137.13802, 6509.8423)(139.6436, 27163.734)(140.05702, 19213.938)(175.25615, 38961.12)(176.27835, 6610.169)(178.0421, 1922.5)(159.63304, 3339.3726)	3.51622
2,3-Dihydroxy-1-guaiacylpropanone	Other polyphenols	Hydroxybenzoketones	1837872	1626606	1764331	1138372	1079818	1008177	4114866	4579490	4399577	2754966	2461248	2447241	2086729	2343685	1643432	683834	645984	651599	1423285	1092578	560311	2655025	1864739	2251543	727531	808303	958288	3099754	2882334	2927578	308512	817329	772292	1	1	1	(212.6685, 1693.8866)(215.07397, 556.74)(194.56055, 529.5933)(213.52275, 14917.53)(214.08014, 1623.068)(215.0871, 74.0)(195.20996, 35338.72)(196.06972, 6700.7085)(235.20415, 2828.2366)(236.05725, 235.54501)(219.80634, 948.5009)	4.53988
Sinapaldehyde	Other polyphenols	Hydroxycinnamaldehydes	724811	679808	884388	155534	444802	413781	530088	496416	654803	320824	318639	323117	883431	1127275	1161776	265723	237241	224490	334266	308100	322140	139094	136567	130148	1	1	1	485920	402574	411153	688824	694926	695683	1	1	1	(208.6926, 8083.7236)(210.67924, 2944.3423)(190.23079, 11601.135)(191.06577, 1418.2499)(209.55765, 7803.934)(210.0838, 2909.12)(191.67332, 19354.354)(192.07478, 2261.812)(233.06679, 17752.443)(214.42964, 60918.875)(215.55919, 7140.4126)(217.06433, 169.94666)	7.49969
Curcumin	Other polyphenols	Curcuminoids	1947657	1825443	1	340868	332954	316904	347751	385540	1	814204	804761	799414	920552	1	1029783	679650	627387	631307	527830	581827	360585	351388	321740	313967	412746	958631	995003	438556	2956431	3153043	487135	500170	496403	808771	860670	882528	(369.1241, 18388.027)(370.12982, 4144.3457)(371.6367, 389.37)(372.1463, 622.83)(351.9908, 3328.859)(353.45328, 1353.2301)(353.1218, 1519.015)(354.1203, 229.07)(373.148, 2573.72)(355.12906, 1171.77)(356.1372, 1828.07)(393.46057, 3389.7131)(395.6353, 14904.947)(396.1352, 4916.41)(373.1376, 21424.557)(374.18115, 3937.3333)(375.10168, 761.0567)	16.251
Coumarin	Other polyphenols	Hydroxycoumarins	1787593	1623069	1630387	4797208	4285094	4026348	1448743	1511552	1519845	414223	365570	369436	2835641	2765151	3538658	514966	507526	495458	3191671	3329066	3504411	7951878	7244273	6803909	3531572	1	719006	2735721	3008392	3199909	3839625	3806612	3788818	318907	323859	469075	(146.0374, 1108.9)(128.82808, 213561.62)(129.0234, 222202.23)(147.04482, 76045.984)(148.04848, 8785.258)(149.05748, 518.1434)(131.0392, 2808.6833)(171.02997, 6634.162)(152.78368, 13534.351)(153.2203, 930.46594)	5.37969
Esculetin	Other polyphenols	Hydroxycoumarins	3059029	2919848	2862910	1	437411	417596	1096853	1141072	1120313	411672	1	351302	843468	1	622227	8870141	8542279	8120683	753330	784774	1	1	1	1	382725	446319	475202	977139	995988	996522	530717	519256	1	1	1	1	(161.02211, 2602.382)(162.019, 1330.3761)(179.03294, 3620.14)(179.03477, 76375.66)(180.03839, 8159.304)(181.04114, 2111.02)(185.01575, 1099.546)	4.80107
Umbelliferone	Other polyphenols	Hydroxycoumarins	2501262	2377314	2389823	1096440	1287065	1229233	645121	611058	624778	206093	496065	507339	201015	224459	1607265	1	166072	1	1417641	1606585	1753490	1035809	997474	951176	158989	193574	213368	225653	228445	226522	862600	202802	206252	1	1	1231670	(163.74893, 1216.2457)(145.08005, 3927.6245)(145.01733, 872.41504)(164.95064, 159596.34)(164.27992, 2481.9937)(165.05724, 428.00333)(145.28107, 14949.117)(147.03587, 1485.4601)(185.01631, 1069.0591)	4.82878
Mellein	Other polyphenols	Hydroxycoumarins	4149838	6424838	3883637	874810	785674	747899	1746907	1643181	1831760	1073888	1036672	1005780	2029581	2590410	2668727	641162	602814	594635	2297830	1920690	2645136	573988	1	190548	1800187	2044511	2144059	3189475	3084782	3212977	192958	189274	348894	2044460	2250626	2330267	(178.05948, 3413.985)(161.45547, 5456.38)(163.05975, 2834.65)(179.07158, 68256.984)(180.07481, 6473.2007)(181.0857, 258.5)(161.59227, 8622.572)(162.05643, 814.32)(202.27557, 86623.85)(203.80635, 33350.664)(204.81557, 12851.425)(206.07057, 237.42665)(184.65681, 1654.1805)(185.04456, 1927.1616)(187.05356, 684.45496)(188.0606, 865.18)	5.11086
Scopoletin	Other polyphenols	Hydroxycoumarins	632686	619226	607572	842832	1240294	1190485	405374	427797	428360	952236	906356	857506	3110170	3211275	3314114	390812	366347	355581	158619	154394	174591	258756	228688	211602	143134	166893	1142388	2823573	2854560	2901400	104505	797948	814466	161620	1	194969	(192.44179, 7720.952)(194.0503, 264.47)(175.28767, 17028.533)(176.31099, 4504.567)(177.03563, 13096.164)(178.03746, 2125.216)(179.04904, 1613.26)(194.33391, 5149.6826)(195.28351, 4873.0933)(197.39294, 564.9067)(175.19765, 58472.625)(176.04042, 10603.63)(218.04385, 7555.7705)(198.90372, 4414.9336)	2.46634
Esculin	Other polyphenols	Hydroxycoumarins	304558	346542	1674269	2543439	2388779	2299126	360933	373515	373015	1	1	1	2112072	2175929	2239748	175374	1	1	848478	909202	921283	2973647	2641496	2578823	1	1	1	147615	233592	257709	1014697	996774	967301	1	1	1	(341.08322, 37454.832)(342.2223, 5098.515)(343.38702, 2521.657)(344.2609, 5853.4146)(345.09207, 1527.734)(326.2727, 5075.458)(327.0722, 12580.49)(341.08392, 3176.2)(325.375, 67313.92)(326.34326, 9237.114)(327.09372, 2470.45)(363.0765, 11309.868)(364.079, 1650.27)(345.0612, 39098.805)(346.06445, 6303.3335)	3.72128
Estragole	Other polyphenols	Hydroxyphenylpropenes	1288815	1221550	1006172	609032	1572185	821391	1529670	496780	1667960	945723	1	1	1099701	1132252	1321438	556432	1	147632	2289147	2398865	2334929	1348511	687189	652457	1	1	1678470	1105620	3113463	3167380	7180391	7161482	7709449	1	5491606	1	(148.97614, 1600.8376)(130.93701, 3265.353)(149.22237, 61457.7)(150.0999, 8510.637)(131.08649, 9615.283)(132.08202, 536.73334)(173.75279, 2251.5369)(176.0926, 4279.75)(155.02249, 4956.336)(156.65286, 765.0557)(158.08296, 312.61334)	7.69996
2-Methoxy-5-prop-1-enylphenol	Other polyphenols	Hydroxyphenylpropenes	2639071	2593273	2469997	561293	502827	483606	1	676345	525887	443233	402596	397574	758508	982805	962864	228084	560284	203004	3108767	3518990	3753412	628793	558052	515517	1261152	1562225	828644	1298617	1689255	885584	1879706	782873	1877353	1056551	1344002	1518155	(166.08769, 328512.44)(167.09035, 46143.6)(168.0981, 10100.967)(169.09846, 6269.8867)(146.16417, 9963.4795)(166.03264, 20885.182)(167.20137, 2299.7168)(147.41461, 14737.294)(148.08173, 2461.4617)(187.8736, 188850.42)(189.2756, 53920.117)(190.07759, 7195.8296)(171.56734, 23318.295)(172.21255, 3169.2458)(173.57443, 2693.355)	4.39939
Acetyl eugenol	Other polyphenols	Hydroxyphenylpropenes	4056190	3036322	3294126	227886	273644	173094	482608	547513	1	211129	1	205626	718298	1613809	219067	1582132	1551267	1448819	1620305	1681616	1606633	1083169	926289	784105	253751	1	1	1	316391	1	1	1	1172571	242861	137727	140374	(207.2104, 13752.248)(208.09795, 19849.94)(189.94572, 3484.166)(193.0978, 1127.97)(208.7081, 27842.94)(209.53714, 5746.425)(190.04247, 8403.629)(190.52072, 2121.227)(230.49777, 7800.7197)(232.37672, 568.5586)(213.22124, 7530.4287)(214.33467, 9747.1)(215.58415, 7722.47)(216.08734, 1233.165)	6.38271
[6]-Gingerol	Other polyphenols	Hydroxyphenylpropenes	947194	857626	859941	100462	88578	1	543228	437102	514564	106584	85412	89398	913671	962704	969357	239930	218115	212329	292845	312502	1	218092	197414	189931	154484	171069	202883	278783	269076	275985	753158	881140	677957	628467	705475	734953	(301.1218, 5439.863)(302.2348, 970.421)(284.95074, 125627.75)(285.95325, 52125.938)(287.232, 15011.607)(301.97128, 272532.6)(303.24432, 123354.89)(304.24527, 18287.754)(305.24472, 3817.39)(285.66605, 3333.3928)(323.39572, 7841.428)(324.65585, 3455.83)(326.7374, 423.34)(305.21207, 10466.759)(306.21478, 2512.89)(307.2262, 402.24)	16.8818
Anethole	Other polyphenols	Hydroxyphenylpropenes	1	1	1	1	1	1	1	1	1	1	1	1	1	1	1	1	1	1	1	1	1	1	1	1	1	1	1	1	1	1	1	1	1	1	1	1		3.97475
Pinosylvin	Stilbenes	Stilbenes	143064	124746	127700	1312806	1182651	1143252	636342	4316331	326625	1	194880	8345712	258477	208136	182323	389486	325834	335676	739459	636135	678542	2569441	2245702	2113629	1	146255	1	286988	285772	228336	7619136	7469565	560467	2317645	2487686	2597692	(213.89868, 7054.994)(215.09082, 1590.86)(216.43092, 2680.2698)(196.85847, 5369.271)(197.5839, 2120.755)(216.81703, 2475.6863)(217.6025, 30901.516)(218.1084, 16645.08)(197.12297, 39849.82)(198.6608, 8289.64)(199.45547, 6057.26)(200.09314, 3884.085)(237.96051, 4153.4355)(239.41946, 8374.85)(240.0883, 2139.5369)(220.54533, 3774.5054)(222.0817, 221.36)	3.94012
Resveratrol	Stilbenes	Stilbenes	846247	820350	447507	976783	727091	722494	542550	589186	525254	2406407	2328800	2303242	948115	1332157	982647	820430	322291	794563	1119374	1232559	163485	832076	694365	674078	1	312726	1	694051	708989	730943	561584	2505873	2454897	301958	327827	281712	(230.64514, 4660.339)(232.08543, 276.06)(211.83496, 4171.049)(212.77588, 3380.7122)(214.0777, 145.42499)(231.0099, 4447.281)(232.09479, 577.69995)(213.23764, 6067.2715)(215.19879, 5345.747)(215.33467, 2147.5725)(216.08914, 2120.065)(252.87465, 3700.857)(253.0709, 187.37)(235.01683, 5577.129)(238.07254, 15772.097)	3.19038
Piceatannol	Stilbenes	Stilbenes	696698	639458	610297	587339	751080	737745	1826733	841127	852553	1131049	986101	1072944	1450879	1558757	1633812	597131	574134	546698	553281	1073466	1118640	814656	757252	742842	511502	464383	619670	673369	1	844850	979635	935973	2208904	90503	102607	110182	(245.36342, 17388.742)(246.39622, 4287.6143)(247.08209, 1115.985)(228.07065, 6061.8223)(228.0749, 307.28)(247.3702, 36723.95)(248.08298, 3591.2961)(230.55507, 4432.1094)(231.63052, 2213.3303)(232.08356, 591.16504)(267.0602, 354.905)(249.78847, 20671.166)(250.1597, 3835.5642)(251.04504, 2392.2766)	5.41536
Pterostilbene	Stilbenes	Stilbenes	2196903	1	1911135	104099	91879	1	371440	390043	378609	321201	311251	306992	1315401	1394596	1331335	1	1	1	1	557677	1922573	364311	347270	317625	1	1	1	720867	687613	1	977649	1	871963	4871342	5281372	5511687	(258.11566, 154.825)(239.60213, 14013.984)(239.09552, 3033.7944)(240.0891, 3306.72)(259.92145, 4588.3286)(259.45428, 1550.8966)(260.46143, 2684.9968)(261.46353, 4415.0737)(262.13586, 5603.125)(242.11484, 3050.8596)(243.71854, 2210.831)(244.11874, 1385.855)(280.2816, 8489.64)(282.65555, 1844.4637)(284.1129, 3280.225)(263.76425, 2670.5513)(265.7011, 2274.308)(266.1029, 2063.52)	5.87134
Resveratrol 5-O-glucoside	Stilbenes	Stilbenes	14300000	13700000	13500000	2401159	2172671	2055388	2505627	1	2614585	1547982	1463050	1464395	4460880	4639351	4801587	209261	194905	1	1	3921177	4028806	100864	853355	847935	4596908	5022381	5222222	6989910	6904735	7201813	209918	233716	182219	554622	626392	663812	(390.13983, 42600.523)(391.14474, 11220.957)(392.1483, 2399.1099)(373.11432, 44646.473)(374.16492, 8539.011)(375.12943, 1606.9716)(393.1516, 12836.88)(394.1547, 343.43)(374.90695, 7906.0913)(375.99265, 23586.021)(376.64084, 27585.78)(377.1433, 15065.913)(415.67294, 3784.6353)	5.712
Piceatannol 3-O-glucoside	Stilbenes	Stilbenes	271932	235608	230638	1	483350	437138	1906478	1934109	1933629	301604	598511	577071	723624	750820	758950	334959	336077	288047	143900	158085	299706	423351	364669	301078	466088	519522	554551	742448	1	1225147	285137	254032	316695	511357	520817	564692	(409.46878, 1323.3734)(411.12714, 6790.66)(391.1243, 2447.06)(390.1124, 2412.72)(408.54672, 4363.166)(390.35373, 9586.364)(390.12012, 2607.9827)(391.1108, 1402.5834)(431.47903, 4754.9985)(430.11105, 1306.055)(431.1085, 427.93)(411.25064, 23373.086)(412.1047, 5322.0796)(413.09827, 894.13544)	7.14181
Pallidol	Stilbenes	Stilbenes	209095	1705384	1644019	2361731	2165631	2065490	519076	1	529891	1160333	1153337	1101564	420978	418695	432733	1	1	1	372477	409317	430405	1	109677	1	483889	528725	556443	1	1	1	1406629	1394255	1322340	110588	127841	145595	(458.01328, 4132.3213)(456.15625, 1265.8634)(437.1292, 2481.6575)(438.1475, 385.05)(459.04654, 888.0156)(437.14316, 45280.75)(438.14807, 12752.13)(477.14014, 322.165)(459.26404, 23990.625)(460.73642, 6824.742)(462.14276, 728.135)	7.85913
