# Supplementary material for: Metabolomic profiling and biological properties of six Limonium species: novel perspectives for nutraceutical purposes
Source: Royal Society of Chemistry journal article supplement (doi:10.1039/d0fo02968h), 2021-01-01
Supplement: d0fo02968h2.xlsx [file d0fo02968h2.xlsx]

## Sheet: Sayfa1
Average Rt(min)	Average Mz	Metabolite name	Adduct type	MS1 isotopic spectrum	MS/MS spectrum	QC1	QC2	QC3
4.467	307.082	(-)-epigallocatechin	[M+H]+	307.08276:192825 308.08611:46899 309.08947:7905	139.03983:4978 151.03816:354 163.0406:319 169.05327:291 181.05037:537 289.07565:307 307.08237:349	11717229	11596171	15921596
10.652	467.277	(19R)-9-acetyl-19-hydroxy-10,14-dimethyl-20-oxopentacyclo[11.8.0.0<2,10>.0<4,9 >.0<14,19>]henicos-17-yl acetate	[M+Na]+	467.27704:21764 468.28039:15595 469.28375:0	467.27469:972	487236	531268	509252
17.572	510.356	1-heptadecanoyl-2-hydroxy-sn-glycero-3-phosphocholine	[M+H]+	510.35638:14555 511.35973:7102 512.36309:0	104.1073:259 184.07492:267 510.35492:2389	115448	114647	99716
3.549	176.072	1-methoxyindole-3-carbaldehyde	[M+H]+	176.07179:13690 177.07514:0 178.0785:0	133.0535:411 148.07591:588 176.07137:1034 176.10422:252	334666	391658	363162
18.344	524.372	1-Stearoyl-sn-glycero-3-phosphocholine	[M+H]+	524.37219:14525 525.37554:6295 526.3789:0	104.10719:472 184.07439:316 506.35211:280 524.37061:2631	462364	475195	359156
4.673	162.056	2,8-Quinolinediol	[M+H]+	162.05591:11404 163.05926:0 164.06262:0	162.05618:2576	268342	261543	49242
3.1	160.077	3-Acetylindole	[M+H]+	160.07678:858887 161.08013:140562 162.08349:9581	160.07602:4519	24256354	25926432	31194
8.31	146.061	3-Formylindole	[M+H]+	146.06102:12966 147.06437:0 148.06773:0	118.0658:1320 146.06194:636	81181	72366	114811
5.848	123.045	3-Hydroxybenzaldehyde	[M+H]+	123.04514:17226 124.04849:0 125.05185:0	81.07178:306 95.04988:1663 123.04476:1080 123.08239:278	447248	481512	362714
6.781	165.056	3-Hydroxycinnamic acid	[M+H]+	165.05566:36869 166.05901:6778 167.06237:6155	119.05043:1058 147.04509:5228	364781	389961	319556
10.516	317.067	3-methylquercetin	[M+H]+	317.06677:34634 318.07012:11981 319.07348:0	302.04462:344 317.06671:4877	848851	867618	858234
3.844	224.129	4-Hydroxybenzoylcholine	[M]+	224.12929:63974 225.13264:9345 226.136:0	93.07085:504 103.05574:251 121.06502:4179	1661661	1823577	181843
5.8	163.04	4-Hydroxycoumarin	[M+H]+	163.0397:11781 164.04305:0 165.04641:0	163.03954:1169	64724	115479	291445
4.881	146.061	4-Hydroxyquinoline	[M+H]+	146.06094:38377 147.06429:9253 148.06765:0	146.06068:6689	983994	1128327	299386
3.073	154.051	5-Aminosalicylic??acid	[M+H]+	154.05074:61303 155.05409:6184 156.05745:0	80.05073:396 84.04529:326 85.02798:336 108.04508:1387 136.04042:306 154.04964:320	2613184	2796175	87164
11.935	237.186	5-hydroxyculmorin	[M-H2O+H]+	237.18643:157120 238.18978:54088 239.19314:9823	95.08713:447 109.10184:430 121.10252:305 123.11791:354 135.11711:441 177.16412:272 191.1785:508 201.16359:662 219.17531:413 237.18623:1791	1985637	2171372	91563
8.286	179.035	6,7-Dihydroxycoumarin	[M+H]+	179.03514:212535 180.03849:27889 181.04185:0	179.03484:9213	4749488	4646846	4698167
3.498	266.14	8-acetamido-2-methyl-7-oxononanoic acid	[M+Na]+	266.13998:248843 267.14333:46647 268.14669:6973	105.07057:425 248.12854:263 266.13898:4054	215426	243175	78934
2.077	146.119	Acetylcholine	[M]+	146.11836:61972 147.12171:5851 148.12507:0	87.04523:383 146.11832:3366	2145577	2568591	9588729
2.156	136.063	Adenine	[M+H]+	136.06236:82135 137.06571:25418 138.06907:7106	91.05435:798 119.03593:655 119.04849:567 136.06294:6313	944141	1117466	2441167
2.167	268.106	Adenosine	[M+H]+	268.10541:395592 269.10876:92254 270.11212:12041	136.06296:5033 268.10477:1298	1919838	1786418	4271476
8.433	271.061	Aloe-emodin	[M+H]+	271.06143:44382 272.06478:10434 273.06814:0	153.01851:767 271.06128:12013	116522	119514	1139766
11.682	353.226	Anileridine	[M+H]+	353.22498:23216 354.22833:5968 355.23169:0	353.22742:2986	759456	769493	274829
12.734	361.202	Cortisone	[M+H]+	361.20145:9204 362.2048:5722 363.20816:5098	361.20016:1164	195198	216711	75176
11.246	239.202	Culmorin	[M+H]+	239.2019:82335 240.20525:33925 241.20861:0	81.07193:264 95.08599:546 109.1011:413 111.11815:335 121.10166:282 123.11751:928 133.10272:566 137.13402:441 147.11832:623 149.13289:253 161.13443:357 163.14854:547 177.16626:256 203.18028:2788 221.19093:3910 239.20016:877	1492629	1569912	169172
4.721	449.108	Cyanidin-3-O-galactoside	[M]+	449.10843:21698 450.11178:8538 451.11514:0	287.05511:4438	534281	553617	119918
3.107	180.089	D-(+)-Glucosamine	[M+H]+	180.08942:17090 181.09277:5994 182.09613:0	180.08978:2984	395547	354787	164112
2.667	220.119	D-Pantothenic Acid	[M+H]+	220.11938:65939 221.12273:8813 222.12609:0	90.05577:1797 116.03461:369 184.09833:338 202.10823:563 220.11949:865	2951948	3172157	2281911
4.256	205.098	D-TRYPTOPHAN	[M+H]+	205.09848:1061564 206.10183:200332 207.10519:17787	118.06611:277 132.08185:265 144.0815:603 146.0607:2613 159.09203:344 188.07169:6461	1518898	1659133	6641148
16.241	206.116	Dehydrosalsolidine	[M+H]+	206.11646:19654 207.11981:5341 208.12317:0	206.11612:361	125694	157678	281827
3.278	303.049	Delphinidin	[M]+	303.04868:54041 304.05203:7425 305.05539:0	303.04852:294	1276728	1277222	1276975
20.537	315.233	delta9-Tetrahydrocannabinol	[M+H]+	315.23248:11461 316.23583:0 317.23919:0	315.23236:2607	112981	111912	313158
16.999	242.285	dimethyl(tetradecyl)amine	[M+H]+	242.2851:11777 243.28845:0 244.29181:0	242.28455:830	611553	636542	271973
3.028	130.087	DL-Pipecolinic acid	[M+H]+	130.08716:81656 131.09051:6733 132.09387:12188	84.04483:800 84.08128:2462 130.06572:266 130.08734:897	1316678	1432367	424323
5.924	459.093	Epigallocatechin Gallate	[M+H]+	459.09332:386290 460.09667:141612 461.10003:26945	139.04001:15401 139.10358:344 151.03989:1849 153.01849:2368 163.03908:282 181.05141:432 205.04997:349 289.07159:713	8128234	8525961	6657258
21.874	338.343	Erucamide	[M+H]+	338.34271:47607 339.34606:29156 340.34942:0	303.30389:329 321.31439:422 338.34271:3210	1244188	1214235	1817996
7.307	195.067	Ferulic acid	[M+H]+	195.06674:163816 196.07009:36261 197.07345:7092	89.03986:428 117.03433:1237 145.02914:8576 149.06053:605 177.05585:16063	137125	116121	3915446
9.481	314.14	feruloyltyramine	[M+H]+	314.1402:2141943 315.14355:978803 316.14691:124917	93.071:623 103.05591:292 117.03399:618 121.06577:7233 145.02933:6411 177.05574:16804 194.08125:401 314.13828:443	63387211	67783488	36113518
3.334	261.146	gamma-Glutamylleucine	[M+H]+	261.14563:86194 262.14898:12263 263.15234:0	84.04505:2246 86.09711:4225 102.05601:264 130.04977:520 132.10199:888 170.11966:283 198.11324:585	2337916	2486527	2224929
9.964	271.061	Genistein	[M+H]+	271.06088:24028 272.06423:5850 273.06759:0	271.06134:3732	11894838	11677751	1.17863e+07
3.429	141.056	Gentisyl alcohol	[M+H]+	141.05536:40293 142.05871:0 143.06207:0	98.03715:260 126.03177:321 141.05522:3460	1268857	1386215	686296
2.199	284.1	Guanosine	[M+H]+	284.10049:34013 285.10384:9207 286.1072:0	105.05569:326 152.05768:4808	89815	82541	237133
4.97	314.197	Heliotrine	[M+H]+	314.19702:22116 315.20037:6466 316.20373:0	138.09242:580 314.19702:1445	397346	414738	406042
16.872	330.208	Hetisine	[M+H]+	330.20599:10110 331.20934:0 332.2127:0	330.20535:956	25948	24176	238713
6.173	449.109	Homoorientin	[M+H]+	449.10889:1129189 450.11224:618433 451.1156:124790	299.05609:564 329.06494:1442 353.06335:904 383.07495:1060 395.0759:592 413.08618:722 431.0976:1990 449.10785:4100	61771	34175	56799
4.626	120.082	Indoline	[M+H]+	120.0816:36057 121.08495:0 122.08831:0	93.07135:301 103.05536:1372 120.08165:4807	85892	81654	1371778
4.183	132.082	Isoleucine	[M+H]+	132.10245:34520 133.1058:0 134.10916:0	86.09705:744 132.08176:854 132.10258:3336	56475	86243	156868
8.763	465.104	Isoquercetrin	[M+H]+	465.10342:14760 466.10677:8027 467.11013:0	303.05008:1668	418112	382628	400370
7.962	317.066	isorhamnetin	[M+H]+	317.06625:11042 318.0696:0 319.07296:0	317.06595:2842	281416	295193	288304
8.737	287.056	Kaempferol	[M+H]+	287.05582:46704 288.05917:16392 289.06253:0	287.05563:4704	911622	1135643	3175861
2.034	175.12	L-Arginine	[M+H]+	175.12024:104246 176.12359:10591 177.12695:0	116.07114:1033 116.99611:698 130.09871:296 158.09319:546 175.11975:1598	916531	871894	894212
3.568	146.119	L-beta-Homoisoleucine	[M+H]+	146.11841:31208 147.12176:0 148.12512:0	86.09715:4337 146.11797:288	299872	356212	243628
2.167	182.083	L-TYROSINE	[M+H]+	182.08244:113866 183.08579:20515 184.08915:0	91.05575:360 119.04909:693 123.04462:1117 136.07649:3626 147.04509:752 165.05511:1703 182.08087:362	955353	958181	1411331
2.111	132.103	Leucine	[M+H]+	132.10294:849765 133.10629:73379 134.10965:6121	86.09736:7953 132.10249:1295	39296556	44557792	11262278
7.055	197.119	Loliolide	[M+H]+	197.11861:413237 198.12196:85890 199.12532:8308	91.05489:650 93.07041:1163 95.05152:329 105.07121:555 107.08627:3645 109.06671:308 109.10017:293 119.08608:437 121.06539:652 123.11829:366 133.10193:3240 135.11742:8571 137.09668:480 151.11319:490 161.09723:3544 179.10767:17333 197.11836:21225	8116871	8563776	9132693
18.474	170.155	Lupinine	[M+H]+	170.15479:12294 171.15814:0 172.1615:0	170.15393:302	259746	277184	485421
9.026	287.056	Luteolin	[M+H]+	287.0563:60113 288.05965:17663 289.06301:0	287.05597:5812	37537	45478	285687
2.835	127.04	Maltol	[M+H]+	127.04007:47191 128.04342:0 129.04678:0	81.03427:251 109.02977:390 127.04014:3174	228987	256328	314344
1.563	365.107	Melibiose	[M+Na]+	365.10632:485162 366.10967:168618 367.11303:36537	185.04376:559 203.05266:1004 365.10629:10022	26324788	31411514	4925988
6.459	319.046	Myricetin	[M+H]+	319.04568:309124 320.04903:84297 321.05239:12949	319.04602:3557	6698976	7259118	14213242
7.099	465.104	Myricitrin	[M+H]+	465.10364:549340 466.10699:178725 467.11035:36632	85.02891:1420 129.0554:1026 147.0663:266 319.04565:9062	8534112	8845391	13111635
6.375	219.114	N-Acetyl-5-hydroxytryptamine	[M+H]+	219.11403:8275 220.11738:0 221.12074:0	132.08118:574 142.06526:288 143.0743:300 159.09315:513 160.07718:3037 170.05971:380 202.08705:312	214533	214815	191667
18.549	326.306	Oleoyl Ethanolamide	[M+H]+	326.3056:16313 327.30895:8374 328.31231:0	326.306:848	111627	112159	811119
4.674	167.071	Paeonol	[M+H]+	167.07126:20159 168.07461:0 169.07797:0	121.03004:309 167.07027:1267	782961	845684	185485
16.768	496.341	PC(16:0/0:0)	[M+H]+	496.34085:345694 497.3442:208096 498.34756:36414	104.10709:417 184.0741:867 496.34006:4994	9242478	9445386	9382161
2.72	166.088	Phenylalanine	[M+H]+	166.08745:843711 167.0908:102321 168.09416:150057	103.0545:487 107.05032:354 120.08159:8377 131.05063:335 166.05009:455 166.08598:282	6493874	6982533	56151556
14.09	286.145	Piperine	[M+H]+	286.14487:13923 287.14822:0 288.15158:0	201.05479:497 286.14368:2406	124391	153398	344117
7.055	116.072	proline	[M+H]+	116.07145:20407 117.0748:0 118.07816:7875	116.07014:460	959289	1261571	535117
7.189	303.051	Quercetin	[M+H]+	303.05084:524578 304.05419:172671 305.05755:24630	303.05048:5606	11887439	11119375	5243488
7.681	435.093	quercetin-3-O-pentoside	[M+H]+	435.09311:41441 436.09646:22555 437.09982:0	115.04005:334 303.05084:21393	232273	223719	1377924
7.938	449.109	Quercitrin	[M+H]+	449.10916:215867 450.11251:121269 451.11587:24311	85.02886:1404 129.05566:908 147.06546:392 303.05029:9407	1195612	1135671	5752458
21.053	609.272	Reserpine	[M+H]+	609.27301:173382 610.27636:121974 611.27972:25464	609.2724:4213	1192453	944817	2615924
4.999	377.146	Riboflavin	[M+H]+	377.146:15938 378.14935:6256 379.15271:0	243.0876:384 377.14578:3377	141393	151121	417271
6.866	611.162	Rutine	[M+H]+	611.16187:45598 612.16522:28250 613.16858:6889	303.0506:3353 465.10379:547	827351	915486	52132
14.782	336.176	Senecionine	[M+H]+	336.17584:19271 337.17919:10438 338.18255:0	105.07137:274 336.17502:4548 336.24963:335	122883	131675	491796
5.12	161.108	Tryptamine	[M+H]+	161.10803:13716 162.11138:0 163.11474:0	144.08145:7987	342982	378721	31614
2.294	138.092	Tyramine	[M+H]+	138.09241:359562 139.09576:42684 140.09912:0	91.05473:548 93.07057:876 103.05534:680 121.06543:9941	7826854	7854385	14346189
4.15	182.082	Tyrosine	[M+H]+	182.08223:29991 183.08558:0 184.08894:0	164.07001:436 165.08949:576 182.0822:1664	811445	891835	52484
5.872	355.104	Undulatoside A	[M+H]+	355.10333:33580 356.10668:10722 357.11004:0	193.05112:5296	956179	444553	158595
7.065	118.087	Valine	[M+H]+	118.08691:17842 119.09026:16126 120.09362:6401	118.08662:2856	1697314	1611351	1654332
6.931	433.114	Vitexin	[M+H]+	433.11395:68770 434.1173:39724 435.12066:9456	283.06299:274 313.07181:707 337.07184:321 367.08109:536 379.08118:289 397.09143:467 415.10126:1030 433.11301:1537	23991	23417	26297
