# Supplementary material for: Metabolomic profiling and biological properties of six Limonium species: novel perspectives for nutraceutical purposes
Source: Royal Society of Chemistry journal article supplement (doi:10.1039/d0fo02968h), 2021-01-01
Supplement: d0fo02968h3.xlsx [file d0fo02968h3.xlsx]

## Sheet: Sayfa1
Aerial parts
		anthocyanins	flavanols	flavones	flavonols	phenolic_acids	lignans	other_polyphenols	stilbenes	limonoids	TPC_spect	TFC_spect	DPPH	ABTS	CUPRAC	FRAP	Phospho	Chelating	ACHE	BCHE	Tyrosinase	Amylase	Glucosidase
anthocyanins	Pearson's correlatioon	1	,502*	,888**	,780**	,816**	0.066	0.382	0.072	0.133	,764**	0.243	0.423	,506*	,677**	,606**	,682**	,608**	0.425	-0.303	0.33	0.414	-0.229
	Sign. (two-tails)		0.034	0	0	0	0.796	0.118	0.778	0.598	0	0.331	0.08	0.032	0.002	0.008	0.002	0.007	0.078	0.222	0.182	0.088	0.361
	N	18	18	18	18	18	18	18	18	18	18	18	18	18	18	18	18	18	18	18	18	18	18
flavanols	Pearson's correlatioon	,502*	1	,560*	0.377	0.222	-0.456	-0.111	-0.367	-,659**	,652**	-0.37	,513*	,721**	,683**	,685**	,640**	-0.01	0.374	0.041	0.416	,500*	0.367
	Sign. (two-tails)	0.034		0.016	0.123	0.375	0.057	0.66	0.135	0.003	0.003	0.131	0.03	0.001	0.002	0.002	0.004	0.97	0.126	0.871	0.086	0.035	0.134
	N	18	18	18	18	18	18	18	18	18	18	18	18	18	18	18	18	18	18	18	18	18	18
flavones	Pearson's correlatioon	,888**	,560*	1	,849**	,787**	-0.053	0.421	-0.131	0.004	,730**	0.324	0.37	,580*	,698**	,649**	,624**	,672**	0.251	-0.338	0.325	0.428	-0.036
	Sign. (two-tails)	0	0.016		0	0	0.833	0.082	0.605	0.986	0.001	0.19	0.131	0.012	0.001	0.004	0.006	0.002	0.315	0.17	0.188	0.076	0.887
	N	18	18	18	18	18	18	18	18	18	18	18	18	18	18	18	18	18	18	18	18	18	18
flavonols	Pearson's correlatioon	,780**	0.377	,849**	1	,834**	0.111	,505*	-0.177	0.059	,684**	,609**	0.214	,570*	,671**	,627**	,526*	,768**	0.005	-,496*	0.407	0.429	-0.262
	Sign. (two-tails)	0	0.123	0		0	0.662	0.033	0.481	0.815	0.002	0.007	0.395	0.013	0.002	0.005	0.025	0	0.984	0.036	0.094	0.076	0.293
	N	18	18	18	18	18	18	18	18	18	18	18	18	18	18	18	18	18	18	18	18	18	18
phenolic_acids	Pearson's correlatioon	,816**	0.222	,787**	,834**	1	0.286	,531*	0.137	0.251	,635**	,538*	0.152	0.398	,567*	,501*	,499*	,698**	0.052	-0.449	0.349	0.361	-0.342
	Sign. (two-tails)	0	0.375	0	0		0.25	0.023	0.587	0.316	0.005	0.021	0.548	0.102	0.014	0.034	0.035	0.001	0.836	0.062	0.156	0.142	0.164
	N	18	18	18	18	18	18	18	18	18	18	18	18	18	18	18	18	18	18	18	18	18	18
lignans	Pearson's correlatioon	0.066	-0.456	-0.053	0.111	0.286	1	0.113	,671**	0.427	0.04	0.292	-0.291	-0.185	-0.056	-0.069	0.047	0.017	-0.36	0.012	0.284	0.125	-0.056
	Sign. (two-tails)	0.796	0.057	0.833	0.662	0.25		0.656	0.002	0.078	0.875	0.24	0.242	0.462	0.824	0.785	0.855	0.946	0.142	0.961	0.254	0.621	0.826
	N	18	18	18	18	18	18	18	18	18	18	18	18	18	18	18	18	18	18	18	18	18	18
other_polyphenols	Pearson's correlatioon	0.382	-0.111	0.421	,505*	,531*	0.113	1	0.261	,652**	-0.156	0.402	-,560*	-0.341	-0.206	-0.29	-0.32	,844**	0.232	-0.328	-0.426	-,499*	-0.308
	Sign. (two-tails)	0.118	0.66	0.082	0.033	0.023	0.656		0.295	0.003	0.536	0.098	0.016	0.167	0.412	0.244	0.196	0	0.353	0.184	0.078	0.035	0.213
	N	18	18	18	18	18	18	18	18	18	18	18	18	18	18	18	18	18	18	18	18	18	18
stilbenes	Pearson's correlatioon	0.072	-0.367	-0.131	-0.177	0.137	,671**	0.261	1	,592**	-0.213	-0.164	-0.44	-,535*	-0.378	-0.406	-0.143	-0.045	0.04	0.197	-0.141	-0.291	0.046
	Sign. (two-tails)	0.778	0.135	0.605	0.481	0.587	0.002	0.295		0.01	0.397	0.517	0.068	0.022	0.122	0.094	0.572	0.859	0.876	0.434	0.576	0.242	0.856
	N	18	18	18	18	18	18	18	18	18	18	18	18	18	18	18	18	18	18	18	18	18	18
limonoids	Pearson's correlatioon	0.133	-,659**	0.004	0.059	0.251	0.427	,652**	,592**	1	-0.415	0.413	-0.448	-,683**	-,515*	-,581*	-,469*	,546*	0.164	-0.314	-,590**	-,608**	-,560*
	Sign. (two-tails)	0.598	0.003	0.986	0.815	0.316	0.078	0.003	0.01		0.087	0.088	0.062	0.002	0.029	0.011	0.05	0.019	0.515	0.204	0.01	0.007	0.016
	N	18	18	18	18	18	18	18	18	18	18	18	18	18	18	18	18	18	18	18	18	18	18
TPC_spect	Pearson's correlatioon	,764**	,652**	,730**	,684**	,635**	0.04	-0.156	-0.213	-0.415	1	0.16	,694**	,908**	,975**	,956**	,969**	0.181	0.055	-0.231	,815**	,876**	0.068
	Sign. (two-tails)	0	0.003	0.001	0.002	0.005	0.875	0.536	0.397	0.087		0.526	0.001	0	0	0	0	0.473	0.827	0.356	0	0	0.789
	N	18	18	18	18	18	18	18	18	18	18	18	18	18	18	18	18	18	18	18	18	18	18
TFC_spect	Pearson's correlatioon	0.243	-0.37	0.324	,609**	,538*	0.292	0.402	-0.164	0.413	0.16	1	0.01	0.132	0.214	0.186	0.011	,697**	-0.353	-,711**	0.092	0.137	-,637**
	Sign. (two-tails)	0.331	0.131	0.19	0.007	0.021	0.24	0.098	0.517	0.088	0.526		0.97	0.6	0.393	0.459	0.965	0.001	0.151	0.001	0.716	0.588	0.004
	N	18	18	18	18	18	18	18	18	18	18	18	18	18	18	18	18	18	18	18	18	18	18
DPPH	Pearson's correlatioon	0.423	,513*	0.37	0.214	0.152	-0.291	-,560*	-0.44	-0.448	,694**	0.01	1	,745**	,731**	,755**	,743**	-0.121	0.229	-0.254	0.462	,699**	-0.129
	Sign. (two-tails)	0.08	0.03	0.131	0.395	0.548	0.242	0.016	0.068	0.062	0.001	0.97		0	0.001	0	0	0.632	0.36	0.31	0.053	0.001	0.61
	N	18	18	18	18	18	18	18	18	18	18	18	18	18	18	18	18	18	18	18	18	18	18
ABTS	Pearson's correlatioon	,506*	,721**	,580*	,570*	0.398	-0.185	-0.341	-,535*	-,683**	,908**	0.132	,745**	1	,968**	,981**	,878**	0.031	-0.061	-0.225	,817**	,908**	0.151
	Sign. (two-tails)	0.032	0.001	0.012	0.013	0.102	0.462	0.167	0.022	0.002	0	0.6	0		0	0	0	0.902	0.81	0.369	0	0	0.55
	N	18	18	18	18	18	18	18	18	18	18	18	18	18	18	18	18	18	18	18	18	18	18
CUPRAC	Pearson's correlatioon	,677**	,683**	,698**	,671**	,567*	-0.056	-0.206	-0.378	-,515*	,975**	0.214	,731**	,968**	1	,991**	,931**	0.169	0.005	-0.288	,818**	,904**	0.06
	Sign. (two-tails)	0.002	0.002	0.001	0.002	0.014	0.824	0.412	0.122	0.029	0	0.393	0.001	0		0	0	0.504	0.984	0.247	0	0	0.814
	N	18	18	18	18	18	18	18	18	18	18	18	18	18	18	18	18	18	18	18	18	18	18
FRAP	Pearson's correlatioon	,606**	,685**	,649**	,627**	,501*	-0.069	-0.29	-0.406	-,581*	,956**	0.186	,755**	,981**	,991**	1	,928**	0.087	-0.045	-0.247	,839**	,932**	0.101
	Sign. (two-tails)	0.008	0.002	0.004	0.005	0.034	0.785	0.244	0.094	0.011	0	0.459	0	0	0		0	0.73	0.86	0.323	0	0	0.691
	N	18	18	18	18	18	18	18	18	18	18	18	18	18	18	18	18	18	18	18	18	18	18
Phospho	Pearson's correlatioon	,682**	,640**	,624**	,526*	,499*	0.047	-0.32	-0.143	-,469*	,969**	0.011	,743**	,878**	,931**	,928**	1	0	0.051	-0.11	,831**	,898**	0.179
	Sign. (two-tails)	0.002	0.004	0.006	0.025	0.035	0.855	0.196	0.572	0.05	0	0.965	0	0	0	0		0.998	0.84	0.664	0	0	0.477
	N	18	18	18	18	18	18	18	18	18	18	18	18	18	18	18	18	18	18	18	18	18	18
Chelating	Pearson's correlatioon	,608**	-0.01	,672**	,768**	,698**	0.017	,844**	-0.045	,546*	0.181	,697**	-0.121	0.031	0.169	0.087	0	1	0.174	-,598**	-0.202	-0.158	-,526*
	Sign. (two-tails)	0.007	0.97	0.002	0	0.001	0.946	0	0.859	0.019	0.473	0.001	0.632	0.902	0.504	0.73	0.998		0.49	0.009	0.421	0.532	0.025
	N	18	18	18	18	18	18	18	18	18	18	18	18	18	18	18	18	18	18	18	18	18	18
ACHE	Pearson's correlatioon	0.425	0.374	0.251	0.005	0.052	-0.36	0.232	0.04	0.164	0.055	-0.353	0.229	-0.061	0.005	-0.045	0.051	0.174	1	-0.077	-0.363	-0.26	-0.141
	Sign. (two-tails)	0.078	0.126	0.315	0.984	0.836	0.142	0.353	0.876	0.515	0.827	0.151	0.36	0.81	0.984	0.86	0.84	0.49		0.761	0.139	0.297	0.576
	N	18	18	18	18	18	18	18	18	18	18	18	18	18	18	18	18	18	18	18	18	18	18
BCHE	Pearson's correlatioon	-0.303	0.041	-0.338	-,496*	-0.449	0.012	-0.328	0.197	-0.314	-0.231	-,711**	-0.254	-0.225	-0.288	-0.247	-0.11	-,598**	-0.077	1	0.017	-0.085	,572*
	Sign. (two-tails)	0.222	0.871	0.17	0.036	0.062	0.961	0.184	0.434	0.204	0.356	0.001	0.31	0.369	0.247	0.323	0.664	0.009	0.761		0.946	0.737	0.013
	N	18	18	18	18	18	18	18	18	18	18	18	18	18	18	18	18	18	18	18	18	18	18
Tyrosinase	Pearson's correlatioon	0.33	0.416	0.325	0.407	0.349	0.284	-0.426	-0.141	-,590**	,815**	0.092	0.462	,817**	,818**	,839**	,831**	-0.202	-0.363	0.017	1	,940**	0.313
	Sign. (two-tails)	0.182	0.086	0.188	0.094	0.156	0.254	0.078	0.576	0.01	0	0.716	0.053	0	0	0	0	0.421	0.139	0.946		0	0.207
	N	18	18	18	18	18	18	18	18	18	18	18	18	18	18	18	18	18	18	18	18	18	18
Amylase	Pearson's correlatioon	0.414	,500*	0.428	0.429	0.361	0.125	-,499*	-0.291	-,608**	,876**	0.137	,699**	,908**	,904**	,932**	,898**	-0.158	-0.26	-0.085	,940**	1	0.192
	Sign. (two-tails)	0.088	0.035	0.076	0.076	0.142	0.621	0.035	0.242	0.007	0	0.588	0.001	0	0	0	0	0.532	0.297	0.737	0		0.445
	N	18	18	18	18	18	18	18	18	18	18	18	18	18	18	18	18	18	18	18	18	18	18
Glucosidase	Pearson's correlatioon	-0.229	0.367	-0.036	-0.262	-0.342	-0.056	-0.308	0.046	-,560*	0.068	-,637**	-0.129	0.151	0.06	0.101	0.179	-,526*	-0.141	,572*	0.313	0.192	1
	Sign. (two-tails)	0.361	0.134	0.887	0.293	0.164	0.826	0.213	0.856	0.016	0.789	0.004	0.61	0.55	0.814	0.691	0.477	0.025	0.576	0.013	0.207	0.445
	N	18	18	18	18	18	18	18	18	18	18	18	18	18	18	18	18	18	18	18	18	18	18
Roots
		anthocyanins	flavanols	flavones	flavonols	phenolic_acids	lignans	other_polyphenols	stilbenes	limonoids	TPC_spect	TFC_spect	DPPH	ABTS	CUPRAC	FRAP	Phospho	Chelating	ACHE	BCHE	Tyrosinase	Amylase	Glucosidase
anthocyanins	Pearson's correlatioon	1	0.198	,597**	,501*	0.099	-,702**	-0.372	-,617**	-0.321	,547*	,761**	0.451	,472*	0.459	0.425	0.428	-,558*	-,836**	-,651**	0.404	0.456	0.349
	Sign. (two-tails)		0.432	0.009	0.034	0.695	0.001	0.128	0.006	0.195	0.019	0	0.06	0.048	0.055	0.079	0.077	0.016	0	0.003	0.096	0.057	0.155
	N	18	18	18	18	18	18	18	18	18	18	18	18	18	18	18	18	18	18	18	18	18	18
flavanols	Pearson's correlatioon	0.198	1	-0.255	-0.262	,893**	,469*	,516*	-0.177	-0.242	,615**	-0.259	,562*	,563*	,589*	,581*	,621**	-,567*	-0.259	0.186	,758**	0.416	-,613**
	Sign. (two-tails)	0.432		0.307	0.293	0	0.05	0.028	0.481	0.333	0.007	0.3	0.015	0.015	0.01	0.012	0.006	0.014	0.298	0.459	0	0.086	0.007
	N	18	18	18	18	18	18	18	18	18	18	18	18	18	18	18	18	18	18	18	18	18	18
flavones	Pearson's correlatioon	,597**	-0.255	1	0.367	-0.301	-,754**	-,590**	-0.459	-0.299	0.239	,727**	0.145	0.168	0.178	0.131	0.137	-0.336	-0.464	-,508*	0.136	0.399	0.46
	Sign. (two-tails)	0.009	0.307		0.134	0.225	0	0.01	0.056	0.228	0.34	0.001	0.567	0.505	0.48	0.604	0.588	0.173	0.053	0.031	0.589	0.101	0.055
	N	18	18	18	18	18	18	18	18	18	18	18	18	18	18	18	18	18	18	18	18	18	18
flavonols	Pearson's correlatioon	,501*	-0.262	0.367	1	-0.313	-,697**	-0.31	-0.128	0.13	0.029	,722**	0.151	0.11	0.041	-0.012	-0.082	0.349	-,743**	-,862**	-0.307	-0.188	,774**
	Sign. (two-tails)	0.034	0.293	0.134		0.206	0.001	0.21	0.614	0.606	0.911	0.001	0.55	0.664	0.873	0.964	0.746	0.156	0	0	0.215	0.454	0
	N	18	18	18	18	18	18	18	18	18	18	18	18	18	18	18	18	18	18	18	18	18	18
phenolic_acids	Pearson's correlatioon	0.099	,893**	-0.301	-0.313	1	,487*	0.415	-0.199	-0.085	0.408	-0.314	0.333	0.343	0.37	0.37	0.424	-,550*	-0.144	0.141	,563*	0.196	-,544*
	Sign. (two-tails)	0.695	0	0.225	0.206		0.041	0.086	0.428	0.738	0.093	0.205	0.177	0.164	0.131	0.131	0.08	0.018	0.569	0.577	0.015	0.436	0.02
	N	18	18	18	18	18	18	18	18	18	18	18	18	18	18	18	18	18	18	18	18	18	18
lignans	Pearson's correlatioon	-,702**	,469*	-,754**	-,697**	,487*	1	,549*	,543*	-0.014	-0.162	-,942**	-0.15	-0.163	-0.127	-0.099	-0.067	0.009	,599**	,814**	0.135	-0.123	-,824**
	Sign. (two-tails)	0.001	0.05	0	0.001	0.041		0.018	0.02	0.955	0.52	0	0.553	0.518	0.617	0.697	0.79	0.971	0.009	0	0.594	0.627	0
	N	18	18	18	18	18	18	18	18	18	18	18	18	18	18	18	18	18	18	18	18	18	18
other_polyphenols	Pearson's correlatioon	-0.372	,516*	-,590**	-0.31	0.415	,549*	1	-0.018	0.371	0.384	-0.361	,485*	,478*	,474*	,516*	,500*	0.182	0.219	0.369	0.363	0.064	-0.379
	Sign. (two-tails)	0.128	0.028	0.01	0.21	0.086	0.018		0.944	0.13	0.116	0.141	0.041	0.045	0.047	0.028	0.035	0.47	0.383	0.132	0.139	0.8	0.121
	N	18	18	18	18	18	18	18	18	18	18	18	18	18	18	18	18	18	18	18	18	18	18
stilbenes	Pearson's correlatioon	-,617**	-0.177	-0.459	-0.128	-0.199	,543*	-0.018	1	-0.139	-,616**	-,625**	-,528*	-,578*	-,578*	-,595**	-,629**	0.411	0.445	0.418	-0.435	-0.319	-0.301
	Sign. (two-tails)	0.006	0.481	0.056	0.614	0.428	0.02	0.944		0.581	0.007	0.006	0.024	0.012	0.012	0.009	0.005	0.09	0.064	0.084	0.071	0.196	0.224
	N	18	18	18	18	18	18	18	18	18	18	18	18	18	18	18	18	18	18	18	18	18	18
limonoids	Pearson's correlatioon	-0.321	-0.242	-0.299	0.13	-0.085	-0.014	0.371	-0.139	1	-0.261	0.086	-0.152	-0.13	-0.182	-0.126	-0.143	,527*	0.285	-0.149	-,495*	-,703**	,492*
	Sign. (two-tails)	0.195	0.333	0.228	0.606	0.738	0.955	0.13	0.581		0.296	0.734	0.546	0.608	0.469	0.619	0.572	0.025	0.252	0.555	0.037	0.001	0.038
	N	18	18	18	18	18	18	18	18	18	18	18	18	18	18	18	18	18	18	18	18	18	18
TPC_spect	Pearson's correlatioon	,547*	,615**	0.239	0.029	0.408	-0.162	0.384	-,616**	-0.261	1	0.389	,968**	,980**	,989**	,981**	,977**	-,477*	-,560*	-0.197	,898**	,731**	-0.153
	Sign. (two-tails)	0.019	0.007	0.34	0.911	0.093	0.52	0.116	0.007	0.296		0.111	0	0	0	0	0	0.045	0.016	0.432	0	0.001	0.544
	N	18	18	18	18	18	18	18	18	18	18	18	18	18	18	18	18	18	18	18	18	18	18
TFC_spect	Pearson's correlatioon	,761**	-0.259	,727**	,722**	-0.314	-,942**	-0.361	-,625**	0.086	0.389	1	0.392	0.407	0.364	0.337	0.295	-0.064	-,716**	-,864**	0.047	0.188	,804**
	Sign. (two-tails)	0	0.3	0.001	0.001	0.205	0	0.141	0.006	0.734	0.111		0.108	0.093	0.138	0.171	0.235	0.8	0.001	0	0.854	0.456	0
	N	18	18	18	18	18	18	18	18	18	18	18	18	18	18	18	18	18	18	18	18	18	18
DPPH	Pearson's correlatioon	0.451	,562*	0.145	0.151	0.333	-0.15	,485*	-,528*	-0.152	,968**	0.392	1	,996**	,989**	,979**	,953**	-0.253	-,574*	-0.243	,802**	,630**	-0.075
	Sign. (two-tails)	0.06	0.015	0.567	0.55	0.177	0.553	0.041	0.024	0.546	0	0.108		0	0	0	0	0.311	0.013	0.331	0	0.005	0.769
	N	18	18	18	18	18	18	18	18	18	18	18	18	18	18	18	18	18	18	18	18	18	18
ABTS	Pearson's correlatioon	,472*	,563*	0.168	0.11	0.343	-0.163	,478*	-,578*	-0.13	,980**	0.407	,996**	1	,996**	,990**	,971**	-0.305	-,550*	-0.235	,819**	,635**	-0.069
	Sign. (two-tails)	0.048	0.015	0.505	0.664	0.164	0.518	0.045	0.012	0.608	0	0.093	0		0	0	0	0.219	0.018	0.347	0	0.005	0.786
	N	18	18	18	18	18	18	18	18	18	18	18	18	18	18	18	18	18	18	18	18	18	18
CUPRAC	Pearson's correlatioon	0.459	,589*	0.178	0.041	0.37	-0.127	,474*	-,578*	-0.182	,989**	0.364	,989**	,996**	1	,995**	,983**	-0.358	-,517*	-0.176	,862**	,683**	-0.136
	Sign. (two-tails)	0.055	0.01	0.48	0.873	0.131	0.617	0.047	0.012	0.469	0	0.138	0	0		0	0	0.145	0.028	0.486	0	0.002	0.591
	N	18	18	18	18	18	18	18	18	18	18	18	18	18	18	18	18	18	18	18	18	18	18
FRAP	Pearson's correlatioon	0.425	,581*	0.131	-0.012	0.37	-0.099	,516*	-,595**	-0.126	,981**	0.337	,979**	,990**	,995**	1	,989**	-0.345	-0.46	-0.132	,853**	,657**	-0.147
	Sign. (two-tails)	0.079	0.012	0.604	0.964	0.131	0.697	0.028	0.009	0.619	0	0.171	0	0	0		0	0.161	0.055	0.603	0	0.003	0.561
	N	18	18	18	18	18	18	18	18	18	18	18	18	18	18	18	18	18	18	18	18	18	18
Phospho	Pearson's correlatioon	0.428	,621**	0.137	-0.082	0.424	-0.067	,500*	-,629**	-0.143	,977**	0.295	,953**	,971**	,983**	,989**	1	-0.424	-0.424	-0.093	,881**	,657**	-0.2
	Sign. (two-tails)	0.077	0.006	0.588	0.746	0.08	0.79	0.035	0.005	0.572	0	0.235	0	0	0	0		0.08	0.079	0.713	0	0.003	0.425
	N	18	18	18	18	18	18	18	18	18	18	18	18	18	18	18	18	18	18	18	18	18	18
Chelating	Pearson's correlatioon	-,558*	-,567*	-0.336	0.349	-,550*	0.009	0.182	0.411	,527*	-,477*	-0.064	-0.253	-0.305	-0.358	-0.345	-0.424	1	0.228	-0.067	-,692**	-,608**	0.401
	Sign. (two-tails)	0.016	0.014	0.173	0.156	0.018	0.971	0.47	0.09	0.025	0.045	0.8	0.311	0.219	0.145	0.161	0.08		0.363	0.79	0.001	0.007	0.099
	N	18	18	18	18	18	18	18	18	18	18	18	18	18	18	18	18	18	18	18	18	18	18
ACHE	Pearson's correlatioon	-,836**	-0.259	-0.464	-,743**	-0.144	,599**	0.219	0.445	0.285	-,560*	-,716**	-,574*	-,550*	-,517*	-0.46	-0.424	0.228	1	,769**	-0.333	-0.338	-0.372
	Sign. (two-tails)	0	0.298	0.053	0	0.569	0.009	0.383	0.064	0.252	0.016	0.001	0.013	0.018	0.028	0.055	0.079	0.363		0	0.177	0.17	0.128
	N	18	18	18	18	18	18	18	18	18	18	18	18	18	18	18	18	18	18	18	18	18	18
BCHE	Pearson's correlatioon	-,651**	0.186	-,508*	-,862**	0.141	,814**	0.369	0.418	-0.149	-0.197	-,864**	-0.243	-0.235	-0.176	-0.132	-0.093	-0.067	,769**	1	0.155	0.096	-,808**
	Sign. (two-tails)	0.003	0.459	0.031	0	0.577	0	0.132	0.084	0.555	0.432	0	0.331	0.347	0.486	0.603	0.713	0.79	0		0.539	0.704	0
	N	18	18	18	18	18	18	18	18	18	18	18	18	18	18	18	18	18	18	18	18	18	18
Tyrosinase	Pearson's correlatioon	0.404	,758**	0.136	-0.307	,563*	0.135	0.363	-0.435	-,495*	,898**	0.047	,802**	,819**	,862**	,853**	,881**	-,692**	-0.333	0.155	1	,843**	-,528*
	Sign. (two-tails)	0.096	0	0.589	0.215	0.015	0.594	0.139	0.071	0.037	0	0.854	0	0	0	0	0	0.001	0.177	0.539		0	0.024
	N	18	18	18	18	18	18	18	18	18	18	18	18	18	18	18	18	18	18	18	18	18	18
Amylase	Pearson's correlatioon	0.456	0.416	0.399	-0.188	0.196	-0.123	0.064	-0.319	-,703**	,731**	0.188	,630**	,635**	,683**	,657**	,657**	-,608**	-0.338	0.096	,843**	1	-0.38
	Sign. (two-tails)	0.057	0.086	0.101	0.454	0.436	0.627	0.8	0.196	0.001	0.001	0.456	0.005	0.005	0.002	0.003	0.003	0.007	0.17	0.704	0		0.12
	N	18	18	18	18	18	18	18	18	18	18	18	18	18	18	18	18	18	18	18	18	18	18
Glucosidase	Pearson's correlatioon	0.349	-,613**	0.46	,774**	-,544*	-,824**	-0.379	-0.301	,492*	-0.153	,804**	-0.075	-0.069	-0.136	-0.147	-0.2	0.401	-0.372	-,808**	-,528*	-0.38	1
	Sign. (two-tails)	0.155	0.007	0.055	0	0.02	0	0.121	0.224	0.038	0.544	0	0.769	0.786	0.591	0.561	0.425	0.099	0.128	0	0.024	0.12
	N	18	18	18	18	18	18	18	18	18	18	18	18	18	18	18	18	18	18	18	18	18	18
