# Supplementary material for: Metabolomic profiling and biological properties of six Limonium species: novel perspectives for nutraceutical purposes
Source: Royal Society of Chemistry journal article supplement (doi:10.1039/d0fo02968h), 2021-01-01
Supplement: d0fo02968h4.pdf [file d0fo02968h4.pdf]

### **Supplementary material**

**Supplementary table 1.** Polyphenols and limonoids putatively annotated according to the UHPLC-QTOF mass spectrometry approach.

Compounds (organized in classes and subclasses) are provided together with relative abundance values and composite mass spectrum.

**Supplementary table 2.** Compounds resulted from MSMS annotation in Quality Control samples and using the software MS-Dial. Each compound is provided together with its MS and MSMS spectrum.

**Supplementary table 3.** Pearson's correlation coefficients considering both aerial parts and roots of the different *Limonium* species.
